# Supplementary material for: Investigating the deregulation of metabolic tasks via Minimum Network Enrichment Analysis (MiNEA) as applied to nonalcoholic fatty liver disease using mouse and human omics data
Source: PLoS Comput Biol. 2019 Apr 19;15(4):e1006760. doi: 10.1371/journal.pcbi.1006760 (PMC6493771; doi:10.1371/journal.pcbi.1006760)
Supplement: S4 Table — Description of the table heading is illustrated in ‘Symbol’ sheet of the excel file. Please see the Symbol sheet for the detail description for the tables: S5-S9. (XLSX) [file pcbi.1006760.s004.xlsx]

## Sheet: Symbol
h	Human
m	Mouse
N	Normal
S	Steatosis
NS	Nonalcoholic steatohepatitis
TaskID	Metabolic task ID for an alternative synthesis network of a given metabolite
#deregulated	Number of deregulated genes between a pair of comaprison
#total genes	Total number of genes in a synthesis network
percentage	Percentage of deregulated genes
pvalue	For statistical significance test
FDR	Flase discovery rate
entrezids	Genes IDs

## Sheet: NSh vs Sh
TaskID	Description	#deregulated	#total genes	percentage	pvalue	FDR	entrezids
chsterol_c_11	Cholesterol synthesis	56	131	0.427481	0.0204491	0	13121,22273,56421,319554,110446,14137,78894,67041,15486,20537,66194,20775,12715,114479,11636,11676,235293,27402,17855,13807,208715,15357,74754,171210,224530,11409,66171,15488,230163,78801,26458,246787,110208,13595,18194,241612,74419,14081,18642,109342,216019,15275,16987,110196,212032,68603,21881,12709,192156,78070,12183,13360,21351,57279,66445,67895
chsterol_c_22	Cholesterol synthesis	56	131	0.427481	0.0204491	0	13121,22273,56421,319554,110446,14137,78894,67041,15486,20537,66194,20775,12715,114479,11636,11676,235293,27402,17855,13807,208715,15357,74754,171210,224530,11409,66171,15488,230163,78801,26458,246787,110208,13595,18194,241612,74419,14081,18642,109342,216019,15275,16987,110196,212032,68603,21881,12709,192156,78070,12183,13360,21351,57279,66445,67895
chsterol_c_27	Cholesterol synthesis	56	131	0.427481	0.0204491	0	13121,22273,56421,319554,110446,14137,78894,67041,20537,66194,20775,12715,114479,11636,11676,235293,27402,17855,13807,208715,15357,74754,171210,224530,11409,66171,15490,15488,230163,78801,26458,246787,110208,13595,18194,241612,74419,14081,18642,109342,216019,15275,16987,110196,212032,68603,21881,12709,192156,78070,12183,13360,21351,57279,66445,67895
chsterol_c_36	Cholesterol synthesis	56	131	0.427481	0.0204491	0	13121,22273,56421,319554,110446,14137,78894,67041,15486,20537,66194,20775,12715,114479,11636,11676,235293,27402,17855,13807,208715,15357,74754,171210,224530,11409,66171,15488,230163,78801,26458,246787,110208,13595,18194,241612,74419,14081,18642,109342,216019,15275,16987,110196,212032,68603,21881,12709,192156,78070,12183,13360,21351,57279,66445,67895
chsterol_c_58	Cholesterol synthesis	56	131	0.427481	0.0204491	0	13121,22273,56421,319554,110446,14137,78894,67041,20537,66194,20775,12715,114479,11636,11676,235293,27402,17855,13807,208715,15357,74754,171210,224530,11409,66171,15490,15488,230163,78801,26458,246787,110208,13595,18194,241612,74419,14081,18642,109342,216019,15275,16987,110196,212032,68603,21881,12709,192156,78070,12183,13360,21351,57279,66445,67895
chsterol_c_2	Cholesterol synthesis	55	130	0.423077	0.0269835	0	13121,22273,56421,319554,110446,14137,78894,67041,20537,66194,20775,12715,11636,11676,235293,27402,17855,13807,208715,15357,74754,171210,224530,11409,66171,15490,15488,230163,78801,26458,246787,110208,13595,18194,241612,74419,14081,18642,109342,216019,15275,16987,110196,212032,68603,21881,12709,192156,78070,12183,13360,21351,57279,66445,67895
chsterol_c_25	Cholesterol synthesis	55	130	0.423077	0.0269835	0	13121,22273,56421,319554,110446,14137,78894,67041,15486,20537,66194,20775,12715,11636,11676,235293,27402,17855,13807,208715,15357,74754,171210,224530,11409,66171,15488,230163,78801,26458,246787,110208,13595,18194,241612,74419,14081,18642,109342,216019,15275,16987,110196,212032,68603,21881,12709,192156,78070,12183,13360,21351,57279,66445,67895
chsterol_c_26	Cholesterol synthesis	55	130	0.423077	0.0269835	0	13121,22273,56421,319554,110446,14137,78894,67041,20537,66194,20775,12715,11636,11676,235293,27402,17855,13807,208715,15357,74754,171210,224530,11409,66171,15490,15488,230163,78801,26458,246787,110208,13595,18194,241612,74419,14081,18642,109342,216019,15275,16987,110196,212032,68603,21881,12709,192156,78070,12183,13360,21351,57279,66445,67895
chsterol_c_33	Cholesterol synthesis	55	130	0.423077	0.0269835	0	13121,22273,56421,319554,110446,14137,78894,67041,15486,20537,66194,20775,12715,11636,11676,235293,27402,17855,13807,208715,15357,74754,171210,224530,11409,66171,15488,230163,78801,26458,246787,110208,13595,18194,241612,74419,14081,18642,109342,216019,15275,16987,110196,212032,68603,21881,12709,192156,78070,12183,13360,21351,57279,66445,67895
chsterol_c_34	Cholesterol synthesis	55	130	0.423077	0.0269835	0	13121,22273,56421,319554,110446,14137,78894,67041,15486,20537,66194,20775,12715,11636,11676,235293,27402,17855,13807,208715,15357,74754,171210,224530,11409,66171,15488,230163,78801,26458,246787,110208,13595,18194,241612,74419,14081,18642,109342,216019,15275,16987,110196,212032,68603,21881,12709,192156,78070,12183,13360,21351,57279,66445,67895
chsterol_c_55	Cholesterol synthesis	55	130	0.423077	0.0269835	0	13121,22273,56421,319554,110446,14137,78894,67041,20537,66194,20775,12715,11636,11676,235293,27402,17855,13807,208715,15357,74754,171210,224530,11409,66171,15490,15488,230163,78801,26458,246787,110208,13595,18194,241612,74419,14081,18642,109342,216019,15275,16987,110196,212032,68603,21881,12709,192156,78070,12183,13360,21351,57279,66445,67895
chsterol_c_59	Cholesterol synthesis	55	130	0.423077	0.0269835	0	13121,22273,56421,319554,110446,14137,78894,67041,20537,66194,20775,12715,11636,11676,235293,27402,17855,13807,208715,15357,74754,171210,224530,11409,66171,15490,15488,230163,78801,26458,246787,110208,13595,18194,241612,74419,14081,18642,109342,216019,15275,16987,110196,212032,68603,21881,12709,192156,78070,12183,13360,21351,57279,66445,67895
chsterol_c_60	Cholesterol synthesis	55	130	0.423077	0.0269835	0	13121,22273,56421,319554,110446,14137,78894,67041,15486,20537,66194,20775,12715,11636,11676,235293,27402,17855,13807,208715,15357,74754,171210,224530,11409,66171,15488,230163,78801,26458,246787,110208,13595,18194,241612,74419,14081,18642,109342,216019,15275,16987,110196,212032,68603,21881,12709,192156,78070,12183,13360,21351,57279,66445,67895
chsterol_c_51	Cholesterol synthesis	56	133	0.421053	0.0285114	0	13121,22273,56421,319554,110446,14137,78894,67041,20537,66194,20775,12715,114479,11636,11676,235293,27402,17855,13807,208715,15357,74754,171210,224530,11409,66171,15490,15488,230163,78801,26458,246787,110208,13595,18194,241612,74419,14081,18642,109342,216019,15275,16987,110196,212032,68603,21881,12709,192156,78070,12183,13360,21351,57279,66445,67895
chsterol_c_56	Cholesterol synthesis	56	133	0.421053	0.0285114	0	13121,22273,56421,319554,110446,14137,78894,67041,20537,66194,20775,12715,114479,11636,11676,235293,27402,17855,13807,208715,15357,74754,171210,224530,11409,66171,15490,15488,230163,78801,26458,246787,110208,13595,18194,241612,74419,14081,18642,109342,216019,15275,16987,110196,212032,68603,21881,12709,192156,78070,12183,13360,21351,57279,66445,67895
chsterol_c_1	Cholesterol synthesis	57	136	0.419118	0.0300598	0	13121,22273,56421,319554,110446,14137,78894,67041,20544,20537,66194,20775,12715,114479,11636,11676,235293,27402,17855,13807,208715,15357,74754,171210,224530,11409,66171,15490,15488,230163,78801,26458,246787,110208,13595,18194,241612,74419,14081,18642,109342,216019,15275,16987,110196,212032,68603,21881,12709,192156,78070,12183,13360,21351,57279,66445,67895
chsterol_c_38	Cholesterol synthesis	55	131	0.419847	0.0317124	0	13121,22273,56421,319554,110446,14137,78894,67041,20537,66194,20775,12715,11636,11676,235293,27402,17855,13807,208715,15357,74754,171210,224530,11409,66171,15490,15488,230163,78801,26458,246787,110208,13595,18194,241612,74419,14081,18642,109342,216019,15275,16987,110196,212032,68603,21881,12709,192156,78070,12183,13360,21351,57279,66445,67895
chsterol_c_46	Cholesterol synthesis	55	131	0.419847	0.0317124	0	13121,22273,56421,319554,110446,14137,78894,67041,20537,66194,20775,12715,11636,11676,235293,27402,17855,13807,208715,15357,74754,171210,224530,11409,66171,15490,15488,230163,78801,26458,246787,110208,13595,18194,241612,74419,14081,18642,109342,216019,15275,16987,110196,212032,68603,21881,12709,192156,78070,12183,13360,21351,57279,66445,67895
chsterol_c_44	Cholesterol synthesis	57	137	0.416058	0.0350947	0	13121,22273,56421,319554,17252,110446,14137,78894,67041,20537,66194,20775,12715,114479,11636,11676,235293,27402,17855,13807,208715,15357,74754,171210,224530,11409,66171,15490,15488,230163,78801,26458,246787,110208,13595,18194,241612,74419,14081,18642,109342,216019,15275,16987,110196,212032,68603,21881,12709,192156,78070,12183,13360,21351,57279,66445,67895
chsterol_c_52	Cholesterol synthesis	57	137	0.416058	0.0350947	0	13121,22273,56421,319554,17252,110446,14137,78894,67041,20537,66194,20775,12715,114479,11636,11676,235293,27402,17855,13807,208715,15357,74754,171210,224530,11409,66171,15490,15488,230163,78801,26458,246787,110208,13595,18194,241612,74419,14081,18642,109342,216019,15275,16987,110196,212032,68603,21881,12709,192156,78070,12183,13360,21351,57279,66445,67895
chsterol_c_7	Cholesterol synthesis	57	137	0.416058	0.0350947	0	13121,22273,56421,319554,17252,110446,14137,78894,67041,20537,66194,20775,12715,114479,11636,11676,235293,27402,17855,13807,208715,15357,74754,171210,224530,11409,66171,15490,15488,230163,78801,26458,246787,110208,13595,18194,241612,74419,14081,18642,109342,216019,15275,16987,110196,212032,68603,21881,12709,192156,78070,12183,13360,21351,57279,66445,67895
chsterol_c_24	Cholesterol synthesis	58	140	0.414286	0.0368107	0	13121,22273,56421,319554,17252,110446,14137,78894,67041,20537,66194,20775,12715,114479,11636,11676,235293,27402,17855,13807,208715,15357,74754,171210,224530,11409,66171,15490,15488,230163,107605,78801,26458,246787,110208,13595,18194,241612,74419,14081,18642,109342,216019,15275,16987,110196,212032,68603,21881,12709,192156,78070,12183,13360,21351,57279,66445,67895
chsterol_c_39	Cholesterol synthesis	55	132	0.416667	0.0370697	0	13121,22273,56421,319554,110446,14137,78894,67041,20537,66194,20775,12715,11636,11676,235293,27402,17855,13807,208715,15357,74754,171210,224530,11409,66171,15490,15488,230163,78801,26458,246787,110208,13595,18194,241612,74419,14081,18642,109342,216019,15275,16987,110196,212032,68603,21881,12709,192156,78070,12183,13360,21351,57279,66445,67895
chsterol_c_12	Cholesterol synthesis	56	135	0.414815	0.0389102	0	13121,22273,56421,319554,110446,14137,78894,67041,15486,20544,20537,66194,20775,12715,11636,11676,235293,27402,17855,13807,208715,15357,74754,171210,224530,11409,66171,15488,230163,78801,26458,246787,110208,13595,18194,241612,74419,14081,18642,109342,216019,15275,16987,110196,212032,68603,21881,12709,192156,78070,12183,13360,21351,57279,66445,67895
chsterol_c_15	Cholesterol synthesis	56	135	0.414815	0.0389102	0	13121,22273,56421,319554,110446,14137,78894,67041,20544,20537,66194,20775,12715,11636,11676,235293,27402,17855,13807,208715,15357,74754,171210,224530,11409,66171,15490,15488,230163,78801,26458,246787,110208,13595,18194,241612,74419,14081,18642,109342,216019,15275,16987,110196,212032,68603,21881,12709,192156,78070,12183,13360,21351,57279,66445,67895
chsterol_c_8	Cholesterol synthesis	56	135	0.414815	0.0389102	0	13121,22273,56421,319554,110446,14137,78894,67041,15486,20544,20537,66194,20775,12715,11636,11676,235293,27402,17855,13807,208715,15357,74754,171210,224530,11409,66171,15488,230163,78801,26458,246787,110208,13595,18194,241612,74419,14081,18642,109342,216019,15275,16987,110196,212032,68603,21881,12709,192156,78070,12183,13360,21351,57279,66445,67895
chsterol_c_17	Cholesterol synthesis	53	127	0.417323	0.03914	0	13121,22273,56421,319554,110446,14137,78894,67041,15486,20537,66194,20775,12715,114479,11636,11676,235293,27402,17855,13807,208715,15357,74754,171210,224530,11409,66171,15488,230163,78801,26458,110208,13595,18194,74419,14081,18642,216019,15275,16987,110196,212032,68603,21881,12709,192156,78070,12183,13360,21351,57279,66445,67895
chsterol_c_28	Cholesterol synthesis	53	127	0.417323	0.03914	0	13121,22273,56421,319554,110446,14137,78894,67041,15486,20537,66194,20775,12715,114479,11636,11676,235293,27402,17855,13807,208715,15357,74754,171210,224530,11409,66171,15488,230163,78801,26458,110208,13595,18194,74419,14081,18642,216019,15275,16987,110196,212032,68603,21881,12709,192156,78070,12183,13360,21351,57279,66445,67895
chsterol_c_18	Cholesterol synthesis	57	138	0.413043	0.0407651	0	13121,22273,56421,319554,17252,110446,14137,78894,67041,20537,66194,20775,12715,114479,11636,11676,235293,27402,17855,13807,208715,15357,74754,171210,224530,11409,66171,15490,15488,230163,78801,26458,246787,110208,13595,18194,241612,74419,14081,18642,109342,216019,15275,16987,110196,212032,68603,21881,12709,192156,78070,12183,13360,21351,57279,66445,67895
chsterol_c_19	Cholesterol synthesis	57	138	0.413043	0.0407651	0	13121,22273,56421,319554,17252,110446,14137,78894,67041,20537,66194,20775,12715,114479,11636,11676,235293,27402,17855,13807,208715,15357,74754,171210,224530,11409,66171,15490,15488,230163,78801,26458,246787,110208,13595,18194,241612,74419,14081,18642,109342,216019,15275,16987,110196,212032,68603,21881,12709,192156,78070,12183,13360,21351,57279,66445,67895
chsterol_c_21	Cholesterol synthesis	55	133	0.413534	0.0431043	0	13121,22273,56421,319554,110446,14137,78894,67041,15486,20544,20537,66194,20775,12715,114479,11636,11676,235293,27402,17855,13807,208715,15357,74754,171210,224530,11409,66171,15488,230163,78801,26458,246787,110208,13595,18194,74419,14081,18642,216019,15275,16987,110196,212032,68603,21881,12709,192156,78070,12183,13360,21351,57279,66445,67895
chsterol_c_41	Cholesterol synthesis	56	136	0.411765	0.0451055	0	13121,22273,56421,319554,110446,14137,78894,67041,20544,20537,66194,20775,12715,11636,11676,235293,27402,17855,13807,208715,15357,74754,171210,224530,11409,66171,15490,15488,230163,78801,26458,246787,110208,13595,18194,241612,74419,14081,18642,109342,216019,15275,16987,110196,212032,68603,21881,12709,192156,78070,12183,13360,21351,57279,66445,67895
chsterol_c_43	Cholesterol synthesis	56	136	0.411765	0.0451055	0	13121,22273,56421,319554,110446,14137,78894,67041,20544,20537,66194,20775,12715,11636,11676,235293,27402,17855,13807,208715,15357,74754,171210,224530,11409,66171,15490,15488,230163,78801,26458,246787,110208,13595,18194,241612,74419,14081,18642,109342,216019,15275,16987,110196,212032,68603,21881,12709,192156,78070,12183,13360,21351,57279,66445,67895
chsterol_c_45	Cholesterol synthesis	56	136	0.411765	0.0451055	0	13121,22273,56421,319554,17252,110446,14137,78894,67041,20537,66194,20775,12715,11636,11676,235293,27402,17855,13807,208715,15357,74754,171210,224530,11409,66171,15490,15488,230163,78801,26458,246787,110208,13595,18194,241612,74419,14081,18642,109342,216019,15275,16987,110196,212032,68603,21881,12709,192156,78070,12183,13360,21351,57279,66445,67895
chsterol_c_48	Cholesterol synthesis	56	136	0.411765	0.0451055	0	13121,22273,56421,319554,17252,110446,14137,78894,67041,20537,66194,20775,12715,11636,11676,235293,27402,17855,13807,208715,15357,74754,171210,224530,11409,66171,15490,15488,230163,78801,26458,246787,110208,13595,18194,241612,74419,14081,18642,109342,216019,15275,16987,110196,212032,68603,21881,12709,192156,78070,12183,13360,21351,57279,66445,67895
chsterol_c_10	Cholesterol synthesis	54	131	0.412214	0.0477094	0	13121,22273,56421,319554,110446,14137,78894,67041,20544,20537,66194,20775,12715,11636,11676,235293,27402,17855,13807,208715,15357,74754,171210,224530,11409,66171,15490,15488,230163,78801,26458,246787,110208,13595,18194,74419,14081,18642,216019,15275,16987,110196,212032,68603,21881,12709,192156,78070,12183,13360,21351,57279,66445,67895
chsterol_c_29	Cholesterol synthesis	54	131	0.412214	0.0477094	0	13121,22273,56421,319554,110446,14137,78894,67041,20544,20537,66194,20775,12715,11636,11676,235293,27402,17855,13807,208715,15357,74754,171210,224530,11409,66171,15490,15488,230163,78801,26458,246787,110208,13595,18194,74419,14081,18642,216019,15275,16987,110196,212032,68603,21881,12709,192156,78070,12183,13360,21351,57279,66445,67895
chsterol_c_57	Cholesterol synthesis	54	131	0.412214	0.0477094	0	13121,22273,56421,319554,110446,14137,78894,67041,15486,20544,20537,66194,20775,12715,11636,11676,235293,27402,17855,13807,208715,15357,74754,171210,224530,11409,66171,15488,230163,78801,26458,246787,110208,13595,18194,74419,14081,18642,216019,15275,16987,110196,212032,68603,21881,12709,192156,78070,12183,13360,21351,57279,66445,67895
chsterol_c_37	Cholesterol synthesis	58	142	0.408451	0.0491377	0	13121,22273,56421,319554,17252,110446,14137,78894,67041,20544,20537,66194,20775,12715,114479,11636,11676,235293,27402,17855,13807,208715,15357,74754,171210,224530,11409,66171,15490,15488,230163,78801,26458,246787,110208,13595,18194,241612,74419,14081,18642,109342,216019,15275,16987,110196,212032,68603,21881,12709,192156,78070,12183,13360,21351,57279,66445,67895
chsterol_c_47	Cholesterol synthesis	58	142	0.408451	0.0491377	0	13121,22273,56421,319554,17252,110446,14137,78894,67041,20544,20537,66194,20775,12715,114479,11636,11676,235293,27402,17855,13807,208715,15357,74754,171210,224530,11409,66171,15490,15488,230163,78801,26458,246787,110208,13595,18194,241612,74419,14081,18642,109342,216019,15275,16987,110196,212032,68603,21881,12709,192156,78070,12183,13360,21351,57279,66445,67895
chsterol_c_49	Cholesterol synthesis	55	134	0.410448	0.0498641	0	13121,22273,56421,319554,110446,14137,78894,67041,20544,20537,66194,20775,12715,114479,11636,11676,235293,27402,17855,13807,208715,15357,74754,171210,224530,11409,66171,15490,15488,230163,78801,26458,246787,110208,13595,18194,74419,14081,18642,216019,15275,16987,110196,212032,68603,21881,12709,192156,78070,12183,13360,21351,57279,66445,67895
chsterol_c_5	Cholesterol synthesis	55	134	0.410448	0.0498641	0	13121,22273,56421,319554,17252,110446,14137,78894,67041,20537,66194,20775,12715,114479,11636,11676,235293,27402,17855,13807,208715,15357,74754,171210,224530,11409,66171,15490,15488,230163,78801,26458,246787,110208,13595,18194,74419,14081,18642,216019,15275,16987,110196,212032,68603,21881,12709,192156,78070,12183,13360,21351,57279,66445,67895
xolest_hs_c_171	Cholesteryl esters synthesis	59	145	0.406897	0.0511657	0	13121,50799,22273,218756,56421,319554,100705,14137,54403,14194,20537,66194,20775,12715,11636,67863,11676,235293,27402,17855,13807,208715,15357,78830,74754,67680,171210,78920,224530,11428,11409,104112,15490,15488,230163,78801,26458,246787,17448,13595,18194,241612,14081,18642,109342,216019,15275,16987,110196,212032,68603,12709,192156,78070,12183,13360,57279,66445,67895
chsterol_c_35	Cholesterol synthesis	56	137	0.408759	0.0520266	0	13121,22273,56421,319554,17252,110446,14137,78894,67041,20537,66194,20775,12715,11636,11676,235293,27402,17855,13807,208715,15357,74754,171210,224530,11409,66171,15490,15488,230163,78801,26458,246787,110208,13595,18194,241612,74419,14081,18642,109342,216019,15275,16987,110196,212032,68603,21881,12709,192156,78070,12183,13360,21351,57279,66445,67895
chsterol_c_50	Cholesterol synthesis	56	137	0.408759	0.0520266	0	13121,22273,56421,319554,17252,110446,14137,78894,67041,20537,66194,20775,12715,11636,11676,235293,27402,17855,13807,208715,15357,74754,171210,224530,11409,66171,15490,15488,230163,78801,26458,246787,110208,13595,18194,241612,74419,14081,18642,109342,216019,15275,16987,110196,212032,68603,21881,12709,192156,78070,12183,13360,21351,57279,66445,67895
chsterol_c_54	Cholesterol synthesis	56	137	0.408759	0.0520266	0	13121,22273,56421,319554,17252,110446,14137,78894,67041,20537,66194,20775,12715,11636,11676,235293,27402,17855,13807,208715,15357,74754,171210,224530,11409,66171,15490,15488,230163,78801,26458,246787,110208,13595,18194,241612,74419,14081,18642,109342,216019,15275,16987,110196,212032,68603,21881,12709,192156,78070,12183,13360,21351,57279,66445,67895
chsterol_c_6	Cholesterol synthesis	56	137	0.408759	0.0520266	0	13121,22273,56421,319554,17252,110446,14137,78894,67041,20537,66194,20775,12715,11636,11676,235293,27402,17855,13807,208715,15357,74754,171210,224530,11409,66171,15490,15488,230163,78801,26458,246787,110208,13595,18194,241612,74419,14081,18642,109342,216019,15275,16987,110196,212032,68603,21881,12709,192156,78070,12183,13360,21351,57279,66445,67895
chsterol_c_9	Cholesterol synthesis	56	137	0.408759	0.0520266	0	13121,22273,56421,319554,17252,110446,14137,78894,67041,20537,66194,20775,12715,11636,11676,235293,27402,17855,13807,208715,15357,74754,171210,224530,11409,66171,15490,15488,230163,78801,26458,246787,110208,13595,18194,241612,74419,14081,18642,109342,216019,15275,16987,110196,212032,68603,21881,12709,192156,78070,12183,13360,21351,57279,66445,67895
chsterol_c_20	Cholesterol synthesis	54	132	0.409091	0.0550753	0	13121,22273,56421,319554,110446,14137,78894,67041,15486,20544,20537,66194,20775,12715,114479,11636,11676,235293,27402,17855,13807,208715,15357,74754,171210,224530,11409,66171,15488,230163,78801,26458,110208,13595,18194,74419,14081,18642,216019,15275,16987,110196,212032,68603,21881,12709,192156,78070,12183,13360,21351,57279,66445,67895
chsterol_c_42	Cholesterol synthesis	54	132	0.409091	0.0550753	0	13121,22273,56421,319554,110446,14137,78894,67041,20544,20537,66194,20775,12715,114479,11636,11676,235293,27402,17855,13807,208715,15357,74754,171210,224530,11409,66171,15490,15488,230163,78801,26458,110208,13595,18194,74419,14081,18642,216019,15275,16987,110196,212032,68603,21881,12709,192156,78070,12183,13360,21351,57279,66445,67895
chsterol_c_53	Cholesterol synthesis	58	143	0.405594	0.0563682	0	13121,22273,56421,319554,17252,110446,14137,78894,67041,20544,20537,66194,20775,12715,114479,11636,11676,235293,27402,17855,13807,208715,15357,74754,171210,224530,11409,66171,15490,15488,230163,78801,26458,246787,110208,13595,18194,241612,74419,14081,18642,109342,216019,15275,16987,110196,212032,68603,21881,12709,192156,78070,12183,13360,21351,57279,66445,67895
xolest_hs_c_139	Cholesteryl esters synthesis	62	154	0.402597	0.0572812	0	13121,50799,22273,218756,56421,319554,15929,76459,100705,14137,14194,20537,66194,20775,12715,114479,11636,67863,11676,235293,27402,17855,13807,208715,15357,78830,74754,67680,171210,78920,224530,11409,104112,15490,15488,230163,78801,26458,246787,17448,13595,18194,241612,14081,18642,109342,216019,15275,16987,110196,212032,68603,12709,12351,192156,78070,12183,13360,57279,66445,67895,71934
xolest_hs_c_72	Cholesteryl esters synthesis	59	146	0.40411	0.0585445	0	13121,50799,22273,56421,319554,15929,100705,14137,54403,14194,20537,66194,20775,12715,114479,11636,67863,11676,235293,27402,17855,13807,208715,15357,78830,74754,67680,171210,78920,224530,11409,104112,15490,15488,230163,78801,26458,246787,17448,13595,18194,241612,14081,18642,109342,216019,15275,16987,110196,212032,68603,12709,192156,78070,12183,13360,57279,66445,67895
xolest_hs_c_176	Cholesteryl esters synthesis	61	152	0.401316	0.062902	0	13121,50799,22273,218756,56421,319554,76459,100705,14137,14194,20537,66194,20775,12715,11636,67863,11676,235293,27402,17855,13807,208715,15357,78830,74754,67680,171210,78920,224530,11428,11409,104112,15490,15488,230163,78801,26458,246787,17448,13595,18194,241612,14081,18642,109342,216019,15275,16987,110196,212032,68603,12709,12351,192156,78070,12183,13360,57279,66445,67895,71934
chsterol_c_4	Cholesterol synthesis	54	133	0.406015	0.0632581	0	13121,22273,56421,319554,110446,14137,78894,67041,20544,20537,66194,20775,12715,11636,11676,235293,27402,17855,13807,208715,15357,74754,171210,224530,11409,66171,15490,15488,230163,78801,26458,246787,110208,13595,18194,74419,14081,18642,216019,15275,16987,110196,212032,68603,21881,12709,192156,78070,12183,13360,21351,57279,66445,67895
chsterol_c_40	Cholesterol synthesis	54	133	0.406015	0.0632581	0	13121,22273,56421,319554,110446,14137,78894,67041,20544,20537,66194,20775,12715,114479,11636,11676,235293,27402,17855,13807,208715,15357,74754,171210,224530,11409,66171,15490,15488,230163,78801,26458,110208,13595,18194,74419,14081,18642,216019,15275,16987,110196,212032,68603,21881,12709,192156,78070,12183,13360,21351,57279,66445,67895
chsterol_c_32	Cholesterol synthesis	58	144	0.402778	0.0643645	0	13121,22273,56421,319554,17252,110446,14137,78894,67041,20544,20537,66194,20775,12715,11636,11676,235293,27402,17855,13807,208715,15357,74754,171210,224530,11409,66171,15490,15488,230163,107605,78801,26458,246787,110208,13595,18194,241612,74419,14081,18642,109342,216019,15275,16987,110196,212032,68603,21881,12709,192156,78070,12183,13360,21351,57279,66445,67895
xolest_hs_c_13	Cholesteryl esters synthesis	58	144	0.402778	0.0643645	0	13121,50799,22273,56421,319554,100705,14137,54403,14194,20537,66194,20775,12715,11636,67863,11676,235293,27402,17855,13807,208715,15357,78830,74754,67680,171210,78920,224530,11428,11409,104112,15490,15488,230163,78801,26458,246787,17448,13595,18194,241612,14081,18642,109342,216019,15275,16987,110196,212032,68603,12709,192156,78070,12183,13360,57279,66445,67895
xolest_hs_c_123	Cholesteryl esters synthesis	62	155	0.4	0.0650809	0	13121,50799,22273,218756,56421,319554,15929,76459,100705,14137,54403,14194,20537,66194,20775,12715,11636,67863,11676,235293,27402,17855,13807,208715,15357,78830,74754,67680,171210,78920,224530,11409,104112,15490,15488,230163,78801,26458,246787,17448,13595,18194,241612,14081,18642,109342,216019,15275,16987,110196,212032,68603,12709,12351,192156,78070,12183,13360,57279,66445,67895,71934
xolest_hs_c_173	Cholesteryl esters synthesis	62	155	0.4	0.0650809	0	13121,50799,22273,56421,319554,15929,76459,100705,14137,54403,14194,20537,66194,20775,12715,114479,11636,67863,11676,235293,27402,17855,13807,208715,15357,78830,74754,67680,171210,78920,224530,11409,104112,15490,15488,230163,78801,26458,246787,17448,13595,18194,241612,14081,18642,109342,216019,15275,16987,110196,212032,68603,12709,12351,192156,78070,12183,13360,57279,66445,67895,71934
xolest_hs_c_92	Cholesteryl esters synthesis	62	155	0.4	0.0650809	0	13121,50799,22273,218756,56421,319554,76459,100705,14137,54403,14194,20537,66194,20775,12715,11636,67863,11676,235293,27402,17855,13807,208715,15357,78830,74754,67680,171210,78920,224530,11428,11409,104112,15490,15488,230163,78801,26458,246787,17448,13595,18194,241612,14081,18642,109342,216019,15275,16987,110196,212032,68603,12709,12351,192156,78070,12183,13360,57279,66445,67895,71934
xolest_hs_c_48	Cholesteryl esters synthesis	63	158	0.398734	0.0672586	0	13121,50799,22273,218756,56421,319554,76459,100705,14137,20544,14194,20537,66194,20775,12715,114479,11636,67863,11676,235293,27402,17855,13807,208715,15357,78830,74754,67680,171210,78920,224530,11428,11409,104112,15490,15488,230163,78801,26458,246787,17448,13595,18194,241612,14081,18642,109342,216019,15275,16987,110196,212032,68603,12709,12351,192156,78070,12183,13360,57279,66445,67895,71934
chsterol_c_23	Cholesterol synthesis	57	142	0.401408	0.0706937	0	13121,22273,56421,319554,17252,110446,14137,78894,67041,20544,20537,66194,20775,12715,11636,11676,235293,27402,17855,13807,208715,15357,74754,171210,224530,11409,66171,15490,15488,230163,78801,26458,246787,110208,13595,18194,241612,74419,14081,18642,109342,216019,15275,16987,110196,212032,68603,21881,12709,192156,78070,12183,13360,21351,57279,66445,67895
chsterol_c_3	Cholesterol synthesis	57	142	0.401408	0.0706937	0	13121,22273,56421,319554,17252,110446,14137,78894,67041,20544,20537,66194,20775,12715,11636,11676,235293,27402,17855,13807,208715,15357,74754,171210,224530,11409,66171,15490,15488,230163,78801,26458,246787,110208,13595,18194,241612,74419,14081,18642,109342,216019,15275,16987,110196,212032,68603,21881,12709,192156,78070,12183,13360,21351,57279,66445,67895
chsterol_c_31	Cholesterol synthesis	57	142	0.401408	0.0706937	0	13121,22273,56421,319554,17252,110446,14137,78894,67041,20544,20537,66194,20775,12715,11636,11676,235293,27402,17855,13807,208715,15357,74754,171210,224530,11409,66171,15490,15488,230163,78801,26458,246787,110208,13595,18194,241612,74419,14081,18642,109342,216019,15275,16987,110196,212032,68603,21881,12709,192156,78070,12183,13360,21351,57279,66445,67895
xolest_hs_c_16	Cholesteryl esters synthesis	57	142	0.401408	0.0706937	0	13121,50799,22273,218756,56421,319554,15929,100705,14137,14194,20537,66194,20775,12715,114479,11636,67863,11676,235293,27402,17855,13807,208715,15357,78830,74754,67680,171210,78920,224530,11409,104112,15490,15488,230163,78801,26458,246787,17448,13595,18194,14081,18642,216019,15275,16987,110196,212032,68603,12709,192156,78070,12183,13360,57279,66445,67895
xolest_hs_c_138	Cholesteryl esters synthesis	61	153	0.398693	0.0713228	0	13121,50799,22273,56421,319554,15929,76459,100705,14137,14194,20537,66194,20775,12715,114479,11636,67863,11676,235293,27402,17855,13807,208715,15357,78830,74754,67680,171210,78920,224530,11409,104112,15490,15488,230163,78801,26458,246787,17448,13595,18194,241612,14081,18642,109342,216019,15275,16987,110196,212032,68603,12709,12351,192156,78070,12183,13360,57279,66445,67895,71934
xolest_hs_c_181	Cholesteryl esters synthesis	61	153	0.398693	0.0713228	0	13121,50799,22273,56421,319554,15929,76459,100705,14137,14194,20537,66194,20775,12715,114479,11636,67863,11676,235293,27402,17855,13807,208715,15357,78830,74754,67680,171210,78920,224530,11409,104112,15490,15488,230163,78801,26458,246787,17448,13595,18194,241612,14081,18642,109342,216019,15275,16987,110196,212032,68603,12709,12351,192156,78070,12183,13360,57279,66445,67895,71934
chsterol_c_30	Cholesterol synthesis	54	134	0.402985	0.072299	0	13121,22273,56421,319554,17252,110446,14137,78894,67041,20537,66194,20775,12715,114479,11636,11676,235293,27402,17855,13807,208715,15357,74754,171210,224530,11409,66171,15490,15488,230163,78801,26458,110208,13595,18194,74419,14081,18642,216019,15275,16987,110196,212032,68603,21881,12709,192156,78070,12183,13360,21351,57279,66445,67895
xolest_hs_c_170	Cholesteryl esters synthesis	58	145	0.4	0.0731637	0	13121,50799,22273,56421,319554,100705,14137,54403,14194,20537,66194,20775,12715,11636,67863,11676,235293,27402,17855,13807,208715,15357,78830,74754,67680,171210,78920,224530,11428,11409,104112,15490,15488,230163,78801,26458,246787,17448,13595,18194,241612,14081,18642,109342,216019,15275,16987,110196,212032,68603,12709,192156,78070,12183,13360,57279,66445,67895
xolest_hs_c_193	Cholesteryl esters synthesis	58	145	0.4	0.0731637	0	13121,50799,22273,56421,319554,15929,100705,14137,54403,14194,20537,66194,20775,12715,11636,67863,11676,235293,27402,17855,13807,208715,15357,78830,74754,67680,171210,78920,224530,11409,104112,15490,15488,230163,78801,26458,246787,17448,13595,18194,241612,14081,18642,109342,216019,15275,16987,110196,212032,68603,12709,192156,78070,12183,13360,57279,66445,67895
xolest_hs_c_219	Cholesteryl esters synthesis	58	145	0.4	0.0731637	0	13121,50799,22273,56421,319554,15929,100705,14137,54403,14194,20537,66194,20775,12715,11636,67863,11676,235293,27402,17855,13807,208715,15357,78830,74754,67680,171210,78920,224530,11409,104112,15490,15488,230163,78801,26458,246787,17448,13595,18194,241612,14081,18642,109342,216019,15275,16987,110196,212032,68603,12709,192156,78070,12183,13360,57279,66445,67895
xolest_hs_c_200	Cholesteryl esters synthesis	62	156	0.397436	0.0736347	0	13121,50799,22273,218756,56421,319554,15929,76459,100705,14137,54403,14194,20537,66194,20775,12715,11636,67863,11676,235293,27402,17855,13807,208715,15357,78830,74754,67680,171210,78920,224530,11409,104112,15490,15488,230163,78801,26458,246787,17448,13595,18194,241612,14081,18642,109342,216019,15275,16987,110196,212032,68603,12709,12351,192156,78070,12183,13360,57279,66445,67895,71934
xolest_hs_c_60	Cholesteryl esters synthesis	62	156	0.397436	0.0736347	0	13121,50799,22273,218756,56421,319554,15929,76459,100705,14137,54403,14194,20537,66194,20775,12715,11636,67863,11676,235293,27402,17855,13807,208715,15357,78830,74754,67680,171210,78920,224530,11409,104112,15490,15488,230163,78801,26458,246787,17448,13595,18194,241612,14081,18642,109342,216019,15275,16987,110196,212032,68603,12709,12351,192156,78070,12183,13360,57279,66445,67895,71934
xolest_hs_c_93	Cholesteryl esters synthesis	62	156	0.397436	0.0736347	0	13121,50799,22273,218756,56421,319554,15929,76459,100705,14137,14194,20537,66194,20775,12715,114479,11636,67863,11676,235293,27402,17855,13807,208715,15357,78830,74754,67680,171210,78920,224530,11409,104112,15490,15488,230163,78801,26458,246787,17448,13595,18194,241612,14081,18642,109342,216019,15275,16987,110196,212032,68603,12709,12351,192156,78070,12183,13360,57279,66445,67895,71934
xolest_hs_c_203	Cholesteryl esters synthesis	59	148	0.398649	0.0756275	0	13121,50799,22273,56421,319554,15929,100705,14137,54403,14194,20537,66194,20775,12715,114479,11636,67863,11676,235293,27402,17855,13807,208715,15357,78830,74754,67680,171210,78920,224530,11409,104112,15490,15488,230163,78801,26458,246787,17448,13595,18194,241612,14081,18642,109342,216019,15275,16987,110196,212032,68603,12709,192156,78070,12183,13360,57279,66445,67895
xolest_hs_c_96	Cholesteryl esters synthesis	59	148	0.398649	0.0756275	0	13121,50799,22273,56421,319554,15929,100705,14137,54403,14194,20537,66194,20775,12715,114479,11636,67863,11676,235293,27402,17855,13807,208715,15357,78830,74754,67680,171210,78920,224530,11409,104112,15490,15488,230163,78801,26458,246787,17448,13595,18194,241612,14081,18642,109342,216019,15275,16987,110196,212032,68603,12709,192156,78070,12183,13360,57279,66445,67895
xolest_hs_c_59	Cholesteryl esters synthesis	63	159	0.396226	0.0759413	0	13121,50799,22273,56421,319554,76459,100705,14137,54403,20544,14194,20537,66194,20775,12715,114479,11636,67863,11676,235293,27402,17855,13807,208715,15357,78830,74754,67680,171210,78920,224530,11428,11409,104112,15490,15488,230163,78801,26458,246787,17448,13595,18194,241612,14081,18642,109342,216019,15275,16987,110196,212032,68603,12709,12351,192156,78070,12183,13360,57279,66445,67895,71934
xolest_hs_c_225	Cholesteryl esters synthesis	56	140	0.4	0.0775677	0	13121,50799,22273,218756,56421,319554,100705,14137,54403,14194,20537,66194,20775,12715,11636,67863,11676,235293,27402,17855,13807,208715,15357,78830,74754,67680,171210,78920,224530,11428,11409,104112,15490,15488,230163,78801,26458,17448,13595,18194,14081,18642,216019,15275,16987,110196,212032,68603,12709,192156,78070,12183,13360,57279,66445,67895
xolest_hs_c_10	Cholesteryl esters synthesis	60	151	0.397351	0.0780842	0	13121,50799,22273,56421,319554,76459,100705,14137,14194,20537,66194,20775,12715,11636,67863,11676,235293,27402,17855,13807,208715,15357,78830,74754,67680,171210,78920,224530,11428,11409,104112,15490,15488,230163,78801,26458,246787,17448,13595,18194,241612,14081,18642,109342,216019,15275,16987,110196,212032,68603,12709,12351,192156,78070,12183,13360,57279,66445,67895,71934
xolest_hs_c_115	Cholesteryl esters synthesis	60	151	0.397351	0.0780842	0	13121,50799,22273,56421,319554,100705,14137,54403,20544,14194,20537,66194,20775,12715,114479,11636,67863,11676,235293,27402,17855,13807,208715,15357,78830,74754,67680,171210,78920,224530,11428,11409,104112,15490,15488,230163,78801,26458,246787,17448,13595,18194,241612,14081,18642,109342,216019,15275,16987,110196,212032,68603,12709,192156,78070,12183,13360,57279,66445,67895
xolest_hs_c_204	Cholesteryl esters synthesis	60	151	0.397351	0.0780842	0	13121,50799,22273,56421,319554,76459,100705,14137,14194,20537,66194,20775,12715,11636,67863,11676,235293,27402,17855,13807,208715,15357,78830,74754,67680,171210,78920,224530,11428,11409,104112,15490,15488,230163,78801,26458,246787,17448,13595,18194,241612,14081,18642,109342,216019,15275,16987,110196,212032,68603,12709,12351,192156,78070,12183,13360,57279,66445,67895,71934
xolest_hs_c_223	Cholesteryl esters synthesis	60	151	0.397351	0.0780842	0	13121,50799,22273,56421,319554,76459,100705,14137,14194,20537,66194,20775,12715,11636,67863,11676,235293,27402,17855,13807,208715,15357,78830,74754,67680,171210,78920,224530,11428,11409,104112,15490,15488,230163,78801,26458,246787,17448,13595,18194,241612,14081,18642,109342,216019,15275,16987,110196,212032,68603,12709,12351,192156,78070,12183,13360,57279,66445,67895,71934
xolest_hs_c_231	Cholesteryl esters synthesis	60	151	0.397351	0.0780842	0	13121,50799,22273,56421,319554,17252,100705,14137,54403,14194,20537,66194,20775,12715,114479,11636,67863,11676,235293,27402,17855,13807,208715,15357,78830,74754,67680,171210,78920,224530,11428,11409,104112,15490,15488,230163,78801,26458,246787,17448,13595,18194,241612,14081,18642,109342,216019,15275,16987,110196,212032,68603,12709,192156,78070,12183,13360,57279,66445,67895
xolest_hs_c_107	Cholesteryl esters synthesis	61	154	0.396104	0.0805328	0	13121,50799,22273,56421,319554,15929,76459,100705,14137,54403,14194,20537,66194,20775,12715,11636,67863,11676,235293,27402,17855,13807,208715,15357,78830,74754,67680,171210,78920,224530,11409,104112,15490,15488,230163,78801,26458,246787,17448,13595,18194,241612,14081,18642,109342,216019,15275,16987,110196,212032,68603,12709,12351,192156,78070,12183,13360,57279,66445,67895,71934
xolest_hs_c_129	Cholesteryl esters synthesis	61	154	0.396104	0.0805328	0	13121,50799,22273,56421,319554,15929,76459,100705,14137,14194,20537,66194,20775,12715,114479,11636,67863,11676,235293,27402,17855,13807,208715,15357,78830,74754,67680,171210,78920,224530,11409,104112,15490,15488,230163,78801,26458,246787,17448,13595,18194,241612,14081,18642,109342,216019,15275,16987,110196,212032,68603,12709,12351,192156,78070,12183,13360,57279,66445,67895,71934
xolest_hs_c_190	Cholesteryl esters synthesis	61	154	0.396104	0.0805328	0	13121,50799,22273,56421,319554,15929,76459,100705,14137,54403,14194,20537,66194,20775,12715,11636,67863,11676,235293,27402,17855,13807,208715,15357,78830,74754,67680,171210,78920,224530,11409,104112,15490,15488,230163,78801,26458,246787,17448,13595,18194,241612,14081,18642,109342,216019,15275,16987,110196,212032,68603,12709,12351,192156,78070,12183,13360,57279,66445,67895,71934
xolest_hs_c_97	Cholesteryl esters synthesis	61	154	0.396104	0.0805328	0	13121,50799,22273,218756,56421,319554,15929,76459,100705,14137,14194,20537,66194,20775,12715,11636,67863,11676,235293,27402,17855,13807,208715,15357,78830,74754,67680,171210,78920,224530,11409,104112,15490,15488,230163,78801,26458,246787,17448,13595,18194,241612,14081,18642,109342,216019,15275,16987,110196,212032,68603,12709,12351,192156,78070,12183,13360,57279,66445,67895,71934
xolest_hs_c_151	Cholesteryl esters synthesis	58	146	0.39726	0.082799	0	13121,50799,22273,218756,56421,319554,100705,14137,14194,20537,66194,20775,12715,11636,67863,11676,235293,27402,17855,13807,208715,15357,78830,74754,67680,171210,78920,224530,11428,11409,104112,15490,15488,230163,78801,26458,246787,17448,13595,18194,241612,14081,18642,109342,216019,15275,16987,110196,212032,68603,12709,192156,78070,12183,13360,57279,66445,67895
xolest_hs_c_127	Cholesteryl esters synthesis	62	157	0.394904	0.0829727	0	13121,50799,22273,218756,56421,319554,15929,76459,100705,14137,14194,20537,66194,20775,12715,114479,11636,67863,11676,235293,27402,17855,13807,208715,15357,78830,74754,67680,171210,78920,224530,11409,104112,15490,15488,230163,78801,26458,246787,17448,13595,18194,241612,14081,18642,109342,216019,15275,16987,110196,212032,68603,12709,12351,192156,78070,12183,13360,57279,66445,67895,71934
xolest_hs_c_56	Cholesteryl esters synthesis	62	157	0.394904	0.0829727	0	13121,50799,22273,56421,319554,15929,76459,100705,14137,54403,14194,20537,66194,20775,12715,114479,11636,67863,11676,235293,27402,17855,13807,208715,15357,78830,74754,67680,171210,78920,224530,11409,104112,15490,15488,230163,78801,26458,246787,17448,13595,18194,241612,14081,18642,109342,216019,15275,16987,110196,212032,68603,12709,12351,192156,78070,12183,13360,57279,66445,67895,71934
xolest_hs_c_62	Cholesteryl esters synthesis	62	157	0.394904	0.0829727	0	13121,50799,22273,56421,319554,15929,76459,100705,14137,54403,14194,20537,66194,20775,12715,114479,11636,67863,11676,235293,27402,17855,13807,208715,15357,78830,74754,67680,171210,78920,224530,11409,104112,15490,15488,230163,78801,26458,246787,17448,13595,18194,241612,14081,18642,109342,216019,15275,16987,110196,212032,68603,12709,12351,192156,78070,12183,13360,57279,66445,67895,71934
chsterol_c_13	Cholesterol synthesis	55	138	0.398551	0.0850231	0	13121,22273,56421,319554,17252,110446,14137,78894,67041,20544,20537,66194,20775,12715,114479,11636,11676,235293,27402,17855,13807,208715,15357,74754,171210,224530,11409,66171,15490,15488,230163,78801,26458,110208,13595,18194,74419,14081,18642,216019,15275,16987,110196,212032,68603,21881,12709,192156,78070,12183,13360,21351,57279,66445,67895
chsterol_c_16	Cholesterol synthesis	55	138	0.398551	0.0850231	0	13121,22273,56421,319554,17252,110446,14137,78894,67041,20544,20537,66194,20775,12715,11636,11676,235293,27402,17855,13807,208715,15357,74754,171210,224530,11409,66171,15490,15488,230163,78801,26458,246787,110208,13595,18194,74419,14081,18642,216019,15275,16987,110196,212032,68603,21881,12709,192156,78070,12183,13360,21351,57279,66445,67895
xolest_hs_c_152	Cholesteryl esters synthesis	59	149	0.395973	0.0853983	0	13121,50799,22273,56421,319554,100705,14137,54403,20544,14194,20537,66194,20775,12715,11636,67863,11676,235293,27402,17855,13807,208715,15357,78830,74754,67680,171210,78920,224530,11428,11409,104112,15490,15488,230163,78801,26458,246787,17448,13595,18194,241612,14081,18642,109342,216019,15275,16987,110196,212032,68603,12709,192156,78070,12183,13360,57279,66445,67895
xolest_hs_c_80	Cholesteryl esters synthesis	59	149	0.395973	0.0853983	0	13121,50799,22273,56421,319554,15929,100705,14137,54403,14194,20537,66194,20775,12715,114479,11636,67863,11676,235293,27402,17855,13807,208715,15357,78830,74754,67680,171210,78920,224530,11409,104112,15490,15488,230163,78801,26458,246787,17448,13595,18194,241612,14081,18642,109342,216019,15275,16987,110196,212032,68603,12709,192156,78070,12183,13360,57279,66445,67895
xolest_hs_c_100	Cholesteryl esters synthesis	63	160	0.39375	0.0854031	0	13121,50799,22273,56421,319554,17252,76459,100705,14137,54403,14194,20537,66194,20775,12715,114479,11636,67863,11676,235293,27402,17855,13807,208715,15357,78830,74754,67680,171210,78920,224530,11428,11409,104112,15490,15488,230163,78801,26458,246787,17448,13595,18194,241612,14081,18642,109342,216019,15275,16987,110196,212032,68603,12709,12351,192156,78070,12183,13360,57279,66445,67895,71934
xolest_hs_c_114	Cholesteryl esters synthesis	56	141	0.397163	0.087797	0	13121,50799,22273,218756,56421,319554,100705,14137,54403,14194,20537,66194,20775,12715,11636,67863,11676,235293,27402,17855,13807,208715,15357,78830,74754,67680,171210,78920,224530,11428,11409,104112,15490,15488,230163,78801,26458,17448,13595,18194,14081,18642,216019,15275,16987,110196,212032,68603,12709,192156,78070,12183,13360,57279,66445,67895
xolest_hs_c_105	Cholesteryl esters synthesis	60	152	0.394737	0.0879855	0	13121,50799,22273,218756,56421,319554,15929,17252,100705,14137,54403,14194,20537,66194,20775,12715,11636,67863,11676,235293,27402,17855,13807,208715,15357,78830,74754,67680,171210,78920,224530,11409,104112,15490,15488,230163,78801,26458,246787,17448,13595,18194,241612,14081,18642,109342,216019,15275,16987,110196,212032,68603,12709,192156,78070,12183,13360,57279,66445,67895
xolest_hs_c_70	Cholesteryl esters synthesis	60	152	0.394737	0.0879855	0	13121,50799,22273,56421,319554,15929,17252,100705,14137,54403,14194,20537,66194,20775,12715,114479,11636,67863,11676,235293,27402,17855,13807,208715,15357,78830,74754,67680,171210,78920,224530,11409,104112,15490,15488,230163,78801,26458,246787,17448,13595,18194,241612,14081,18642,109342,216019,15275,16987,110196,212032,68603,12709,192156,78070,12183,13360,57279,66445,67895
xolest_hs_c_21	Cholesteryl esters synthesis	61	155	0.393548	0.0905601	0	13121,50799,22273,56421,319554,76459,100705,14137,54403,14194,20537,66194,20775,12715,11636,67863,11676,235293,27402,17855,13807,208715,15357,78830,74754,67680,171210,78920,224530,11428,11409,104112,15490,15488,230163,78801,26458,246787,17448,13595,18194,241612,14081,18642,109342,216019,15275,16987,110196,212032,68603,12709,12351,192156,78070,12183,13360,57279,66445,67895,71934
xolest_hs_c_218	Cholesteryl esters synthesis	61	155	0.393548	0.0905601	0	13121,50799,22273,56421,319554,76459,100705,14137,54403,14194,20537,66194,20775,12715,11636,67863,11676,235293,27402,17855,13807,208715,15357,78830,74754,67680,171210,78920,224530,11428,11409,104112,15490,15488,230163,78801,26458,246787,17448,13595,18194,241612,14081,18642,109342,216019,15275,16987,110196,212032,68603,12709,12351,192156,78070,12183,13360,57279,66445,67895,71934
xolest_hs_c_220	Cholesteryl esters synthesis	62	158	0.392405	0.0931214	0	13121,50799,22273,218756,56421,319554,17252,76459,100705,14137,14194,20537,66194,20775,12715,11636,67863,11676,235293,27402,17855,13807,208715,15357,78830,74754,67680,171210,78920,224530,11428,11409,104112,15490,15488,230163,78801,26458,246787,17448,13595,18194,241612,14081,18642,109342,216019,15275,16987,110196,212032,68603,12709,12351,192156,78070,12183,13360,57279,66445,67895,71934
xolest_hs_c_38	Cholesteryl esters synthesis	62	158	0.392405	0.0931214	0	13121,50799,22273,218756,56421,319554,17252,76459,100705,14137,14194,20537,66194,20775,12715,11636,67863,11676,235293,27402,17855,13807,208715,15357,78830,74754,67680,171210,78920,224530,11428,11409,104112,15490,15488,230163,78801,26458,246787,17448,13595,18194,241612,14081,18642,109342,216019,15275,16987,110196,212032,68603,12709,12351,192156,78070,12183,13360,57279,66445,67895,71934
xolest_hs_c_79	Cholesteryl esters synthesis	62	158	0.392405	0.0931214	0	13121,50799,22273,56421,319554,76459,100705,14137,20544,14194,20537,66194,20775,12715,114479,11636,67863,11676,235293,27402,17855,13807,208715,15357,78830,74754,67680,171210,78920,224530,11428,11409,104112,15490,15488,230163,78801,26458,246787,17448,13595,18194,241612,14081,18642,109342,216019,15275,16987,110196,212032,68603,12709,12351,192156,78070,12183,13360,57279,66445,67895,71934
xolest_hs_c_86	Cholesteryl esters synthesis	62	158	0.392405	0.0931214	0	13121,50799,22273,218756,56421,319554,76459,100705,14137,54403,20544,14194,66194,20775,12715,11636,67863,11676,235293,27402,17855,13807,208715,15357,78830,74754,67680,171210,78920,224530,11428,11409,104112,15490,15488,230163,78801,26458,246787,17448,13595,18194,241612,14081,18642,109342,216019,15275,16987,110196,212032,68603,12709,12351,192156,78070,12183,13360,57279,66445,67895,71934
xolest_hs_c_216	Cholesteryl esters synthesis	58	147	0.394558	0.0932991	0	13121,50799,22273,56421,319554,100705,14137,54403,14194,20537,66194,20775,12715,11636,67863,11676,235293,27402,17855,13807,208715,15357,78830,74754,67680,171210,78920,224530,11428,11409,104112,15490,15488,230163,78801,26458,246787,17448,13595,18194,241612,14081,18642,109342,216019,15275,16987,110196,212032,68603,12709,192156,78070,12183,13360,57279,66445,67895
xolest_hs_c_157	Cholesteryl esters synthesis	63	161	0.391304	0.0956688	0	13121,50799,22273,218756,56421,319554,17252,76459,100705,14137,54403,14194,20537,66194,20775,12715,11636,67863,11676,235293,27402,17855,13807,208715,15357,78830,74754,67680,171210,78920,224530,11428,11409,104112,15490,15488,230163,78801,26458,246787,17448,13595,18194,241612,14081,18642,109342,216019,15275,16987,110196,212032,68603,12709,12351,192156,78070,12183,13360,57279,66445,67895,71934
xolest_hs_c_42	Cholesteryl esters synthesis	63	161	0.391304	0.0956688	0	13121,50799,22273,56421,319554,17252,76459,100705,14137,54403,14194,20537,66194,20775,12715,114479,11636,67863,11676,235293,27402,17855,13807,208715,15357,78830,74754,67680,171210,78920,224530,11428,11409,104112,15490,15488,230163,78801,26458,246787,17448,13595,18194,241612,14081,18642,109342,216019,15275,16987,110196,212032,68603,12709,12351,192156,78070,12183,13360,57279,66445,67895,71934
xolest_hs_c_55	Cholesteryl esters synthesis	63	161	0.391304	0.0956688	0	13121,50799,22273,56421,319554,17252,76459,100705,14137,54403,14194,20537,66194,20775,12715,114479,11636,67863,11676,235293,27402,17855,13807,208715,15357,78830,74754,67680,171210,78920,224530,11428,11409,104112,15490,15488,230163,78801,26458,246787,17448,13595,18194,241612,14081,18642,109342,216019,15275,16987,110196,212032,68603,12709,12351,192156,78070,12183,13360,57279,66445,67895,71934
xolest_hs_c_67	Cholesteryl esters synthesis	63	161	0.391304	0.0956688	0	13121,50799,22273,218756,56421,319554,17252,76459,100705,14137,14194,20537,66194,20775,12715,11636,67863,11676,235293,27402,17855,13807,208715,15357,78830,74754,67680,171210,78920,224530,11428,11409,104112,15490,15488,230163,107605,78801,26458,246787,17448,13595,18194,241612,14081,18642,109342,216019,15275,16987,110196,212032,68603,12709,12351,192156,78070,12183,13360,57279,66445,67895,71934
xolest_hs_c_84	Cholesteryl esters synthesis	63	161	0.391304	0.0956688	0	13121,50799,22273,218756,56421,319554,15929,17252,76459,100705,14137,54403,14194,20537,66194,20775,12715,11636,67863,11676,235293,27402,17855,13807,208715,15357,78830,74754,67680,171210,78920,224530,11409,104112,15490,15488,230163,78801,26458,246787,17448,13595,18194,241612,14081,18642,109342,216019,15275,16987,110196,212032,68603,12709,12351,192156,78070,12183,13360,57279,66445,67895,71934
chsterol_c_14	Cholesterol synthesis	55	139	0.395683	0.096026	0	13121,22273,56421,319554,17252,110446,14137,78894,67041,20544,20537,66194,20775,12715,114479,11636,11676,235293,27402,17855,13807,208715,15357,74754,171210,224530,11409,66171,15490,15488,230163,78801,26458,110208,13595,18194,74419,14081,18642,216019,15275,16987,110196,212032,68603,21881,12709,192156,78070,12183,13360,21351,57279,66445,67895
xolest_hs_c_77	Cholesteryl esters synthesis	60	153	0.392157	0.0987357	0	13121,50799,22273,56421,319554,76459,100705,14137,14194,20537,66194,20775,12715,11636,67863,11676,235293,27402,17855,13807,208715,15357,78830,74754,67680,171210,78920,224530,11428,11409,104112,15490,15488,230163,78801,26458,246787,17448,13595,18194,241612,14081,18642,109342,216019,15275,16987,110196,212032,68603,12709,12351,192156,78070,12183,13360,57279,66445,67895,71934
xolest_hs_c_101	Cholesteryl esters synthesis	61	156	0.391026	0.101428	0	13121,50799,22273,218756,56421,319554,76459,100705,14137,54403,14194,66194,20775,12715,11636,67863,11676,235293,27402,17855,13807,208715,15357,78830,74754,67680,171210,78920,224530,11428,11409,104112,15490,15488,230163,78801,26458,246787,17448,13595,18194,241612,14081,18642,109342,216019,15275,16987,110196,212032,68603,12709,12351,192156,78070,12183,13360,57279,66445,67895,71934
xolest_hs_c_103	Cholesteryl esters synthesis	61	156	0.391026	0.101428	0	13121,50799,22273,56421,319554,76459,100705,14137,54403,14194,20537,66194,20775,12715,11636,67863,11676,235293,27402,17855,13807,208715,15357,78830,74754,67680,171210,78920,224530,11428,11409,104112,15490,15488,230163,78801,26458,246787,17448,13595,18194,241612,14081,18642,109342,216019,15275,16987,110196,212032,68603,12709,12351,192156,78070,12183,13360,57279,66445,67895,71934
xolest_hs_c_188	Cholesteryl esters synthesis	61	156	0.391026	0.101428	0	13121,50799,22273,56421,319554,76459,100705,14137,54403,14194,20537,66194,20775,12715,11636,67863,11676,235293,27402,17855,13807,208715,15357,78830,74754,67680,171210,78920,224530,11428,11409,104112,15490,15488,230163,78801,26458,246787,17448,13595,18194,241612,14081,18642,109342,216019,15275,16987,110196,212032,68603,12709,12351,192156,78070,12183,13360,57279,66445,67895,71934
xolest_hs_c_192	Cholesteryl esters synthesis	61	156	0.391026	0.101428	0	13121,50799,22273,56421,319554,76459,100705,14137,54403,14194,20537,66194,20775,12715,11636,67863,11676,235293,27402,17855,13807,208715,15357,78830,74754,67680,171210,78920,224530,11428,11409,104112,15490,15488,230163,78801,26458,246787,17448,13595,18194,241612,14081,18642,109342,216019,15275,16987,110196,212032,68603,12709,12351,192156,78070,12183,13360,57279,66445,67895,71934
xolest_hs_c_198	Cholesteryl esters synthesis	61	156	0.391026	0.101428	0	13121,50799,22273,56421,319554,15929,76459,100705,14137,54403,14194,20537,66194,20775,12715,11636,67863,11676,235293,27402,17855,13807,208715,15357,78830,74754,67680,171210,78920,224530,11409,104112,15490,15488,230163,78801,26458,246787,17448,13595,18194,241612,14081,18642,109342,216019,15275,16987,110196,212032,68603,12709,12351,192156,78070,12183,13360,57279,66445,67895,71934
xolest_hs_c_206	Cholesteryl esters synthesis	61	156	0.391026	0.101428	0	13121,50799,22273,56421,319554,76459,100705,14137,54403,14194,20537,66194,20775,12715,11636,67863,11676,235293,27402,17855,13807,208715,15357,78830,74754,67680,171210,78920,224530,11428,11409,104112,15490,15488,230163,78801,26458,246787,17448,13595,18194,241612,14081,18642,109342,216019,15275,16987,110196,212032,68603,12709,12351,192156,78070,12183,13360,57279,66445,67895,71934
xolest_hs_c_214	Cholesteryl esters synthesis	61	156	0.391026	0.101428	0	13121,50799,22273,218756,56421,319554,15929,76459,100705,14137,14194,20537,66194,20775,12715,11636,67863,11676,235293,27402,17855,13807,208715,15357,78830,74754,67680,171210,78920,224530,11409,104112,15490,15488,230163,78801,26458,246787,17448,13595,18194,241612,14081,18642,109342,216019,15275,16987,110196,212032,68603,12709,12351,192156,78070,12183,13360,57279,66445,67895,71934
xolest_hs_c_22	Cholesteryl esters synthesis	61	156	0.391026	0.101428	0	13121,50799,22273,56421,319554,76459,100705,14137,20544,14194,20537,66194,20775,12715,11636,67863,11676,235293,27402,17855,13807,208715,15357,78830,74754,67680,171210,78920,224530,11428,11409,104112,15490,15488,230163,78801,26458,246787,17448,13595,18194,241612,14081,18642,109342,216019,15275,16987,110196,212032,68603,12709,12351,192156,78070,12183,13360,57279,66445,67895,71934
xolest_hs_c_229	Cholesteryl esters synthesis	61	156	0.391026	0.101428	0	13121,50799,22273,56421,319554,76459,100705,14137,54403,14194,20537,66194,20775,12715,11636,67863,11676,235293,27402,17855,13807,208715,15357,78830,74754,67680,171210,78920,224530,11428,11409,104112,15490,15488,230163,78801,26458,246787,17448,13595,18194,241612,14081,18642,109342,216019,15275,16987,110196,212032,68603,12709,12351,192156,78070,12183,13360,57279,66445,67895,71934
xolest_hs_c_61	Cholesteryl esters synthesis	61	156	0.391026	0.101428	0	13121,50799,22273,218756,56421,319554,76459,100705,14137,54403,14194,66194,20775,12715,11636,67863,11676,235293,27402,17855,13807,208715,15357,78830,74754,67680,171210,78920,224530,11428,11409,104112,15490,15488,230163,78801,26458,246787,17448,13595,18194,241612,14081,18642,109342,216019,15275,16987,110196,212032,68603,12709,12351,192156,78070,12183,13360,57279,66445,67895,71934
xolest_hs_c_89	Cholesteryl esters synthesis	61	156	0.391026	0.101428	0	13121,50799,22273,56421,319554,76459,100705,14137,54403,14194,20537,66194,20775,12715,11636,67863,11676,235293,27402,17855,13807,208715,15357,78830,74754,67680,171210,78920,224530,11428,11409,104112,15490,15488,230163,78801,26458,246787,17448,13595,18194,241612,14081,18642,109342,216019,15275,16987,110196,212032,68603,12709,12351,192156,78070,12183,13360,57279,66445,67895,71934
xolest_hs_c_99	Cholesteryl esters synthesis	61	156	0.391026	0.101428	0	13121,50799,22273,56421,319554,76459,100705,14137,54403,14194,20537,66194,20775,12715,11636,67863,11676,235293,27402,17855,13807,208715,15357,78830,74754,67680,171210,78920,224530,11428,11409,104112,15490,15488,230163,78801,26458,246787,17448,13595,18194,241612,14081,18642,109342,216019,15275,16987,110196,212032,68603,12709,12351,192156,78070,12183,13360,57279,66445,67895,71934
xolest_hs_c_111	Cholesteryl esters synthesis	62	159	0.389937	0.104103	0	13121,50799,22273,218756,56421,319554,15929,17252,76459,100705,14137,14194,20537,66194,20775,12715,11636,67863,11676,235293,27402,17855,13807,208715,15357,78830,74754,67680,171210,78920,224530,11409,104112,15490,15488,230163,78801,26458,246787,17448,13595,18194,241612,14081,18642,109342,216019,15275,16987,110196,212032,68603,12709,12351,192156,78070,12183,13360,57279,66445,67895,71934
xolest_hs_c_178	Cholesteryl esters synthesis	62	159	0.389937	0.104103	0	13121,50799,22273,218756,56421,319554,15929,76459,100705,14137,54403,14194,20537,66194,20775,12715,11636,67863,11676,235293,27402,17855,13807,208715,15357,78830,74754,67680,171210,78920,224530,11409,104112,15490,15488,230163,78801,26458,246787,17448,13595,18194,241612,14081,18642,109342,216019,15275,16987,110196,212032,68603,12709,12351,192156,78070,12183,13360,57279,66445,67895,71934
xolest_hs_c_4	Cholesteryl esters synthesis	62	159	0.389937	0.104103	0	13121,50799,22273,218756,56421,319554,76459,100705,14137,20544,14194,20537,66194,20775,12715,11636,67863,11676,235293,27402,17855,13807,208715,15357,78830,74754,67680,171210,78920,224530,11428,11409,104112,15490,15488,230163,78801,26458,246787,17448,13595,18194,241612,14081,18642,109342,216019,15275,16987,110196,212032,68603,12709,12351,192156,78070,12183,13360,57279,66445,67895,71934
xolest_hs_c_184	Cholesteryl esters synthesis	58	148	0.391892	0.104688	0	13121,50799,22273,56421,319554,15929,100705,14137,54403,14194,20537,66194,20775,12715,11636,67863,11676,235293,27402,17855,13807,208715,15357,78830,74754,67680,171210,78920,224530,11409,104112,15490,15488,230163,78801,26458,246787,17448,13595,18194,241612,14081,18642,109342,216019,15275,16987,110196,212032,68603,12709,192156,78070,12183,13360,57279,66445,67895
xolest_hs_c_187	Cholesteryl esters synthesis	58	148	0.391892	0.104688	0	13121,50799,22273,56421,319554,15929,100705,14137,54403,14194,20537,66194,20775,12715,11636,67863,11676,235293,27402,17855,13807,208715,15357,78830,74754,67680,171210,78920,224530,11409,104112,15490,15488,230163,78801,26458,246787,17448,13595,18194,241612,14081,18642,109342,216019,15275,16987,110196,212032,68603,12709,192156,78070,12183,13360,57279,66445,67895
xolest_hs_c_226	Cholesteryl esters synthesis	58	148	0.391892	0.104688	0	13121,50799,22273,218756,56421,319554,100705,14137,14194,20537,66194,20775,12715,11636,67863,11676,235293,27402,17855,13807,208715,15357,78830,74754,67680,171210,78920,224530,11428,11409,104112,15490,15488,230163,78801,26458,246787,17448,13595,18194,241612,14081,18642,109342,216019,15275,16987,110196,212032,68603,12709,192156,78070,12183,13360,57279,66445,67895
xolest_hs_c_235	Cholesteryl esters synthesis	58	148	0.391892	0.104688	0	13121,50799,22273,56421,319554,15929,100705,14137,54403,14194,20537,66194,20775,12715,11636,67863,11676,235293,27402,17855,13807,208715,15357,78830,74754,67680,171210,78920,224530,11409,104112,15490,15488,230163,78801,26458,246787,17448,13595,18194,241612,14081,18642,109342,216019,15275,16987,110196,212032,68603,12709,192156,78070,12183,13360,57279,66445,67895
xolest_hs_c_141	Cholesteryl esters synthesis	63	162	0.388889	0.106759	0	13121,50799,22273,218756,56421,319554,15929,17252,76459,100705,14137,54403,14194,20537,66194,20775,12715,11636,67863,11676,235293,27402,17855,13807,208715,15357,78830,74754,67680,171210,78920,224530,11409,104112,15490,15488,230163,78801,26458,246787,17448,13595,18194,241612,14081,18642,109342,216019,15275,16987,110196,212032,68603,12709,12351,192156,78070,12183,13360,57279,66445,67895,71934
xolest_hs_c_39	Cholesteryl esters synthesis	63	162	0.388889	0.106759	0	13121,50799,22273,56421,319554,15929,17252,76459,100705,14137,14194,20537,66194,20775,12715,114479,11636,67863,11676,235293,27402,17855,13807,208715,15357,78830,74754,67680,171210,78920,224530,11409,104112,15490,15488,230163,107605,78801,26458,246787,17448,13595,18194,241612,14081,18642,109342,216019,15275,16987,110196,212032,68603,12709,12351,192156,78070,12183,13360,57279,66445,67895,71934
xolest_hs_c_47	Cholesteryl esters synthesis	63	162	0.388889	0.106759	0	13121,50799,22273,56421,319554,17252,76459,100705,14137,54403,14194,20537,66194,20775,12715,11636,67863,11676,235293,27402,17855,13807,208715,15357,78830,74754,67680,171210,78920,224530,11428,11409,104112,15490,15488,230163,107605,78801,26458,246787,17448,13595,18194,241612,14081,18642,109342,216019,15275,16987,110196,212032,68603,12709,12351,192156,78070,12183,13360,57279,66445,67895,71934
xolest_hs_c_102	Cholesteryl esters synthesis	59	151	0.390728	0.107532	0	13121,50799,22273,56421,319554,15929,76459,100705,14137,54403,14194,20537,66194,20775,12715,114479,11636,67863,11676,235293,27402,17855,13807,208715,15357,78830,74754,67680,171210,78920,224530,11409,104112,15490,15488,230163,78801,26458,17448,13595,18194,14081,18642,216019,15275,16987,110196,212032,68603,12709,12351,192156,78070,12183,13360,57279,66445,67895,71934
xolest_hs_c_180	Cholesteryl esters synthesis	59	151	0.390728	0.107532	0	13121,50799,22273,218756,56421,319554,15929,100705,14137,54403,14194,20537,66194,20775,12715,11636,67863,11676,235293,27402,17855,13807,208715,15357,78830,74754,67680,171210,78920,224530,11409,104112,15490,15488,230163,78801,26458,246787,17448,13595,18194,241612,14081,18642,109342,216019,15275,16987,110196,212032,68603,12709,192156,78070,12183,13360,57279,66445,67895
xolest_hs_c_183	Cholesteryl esters synthesis	59	151	0.390728	0.107532	0	13121,50799,22273,56421,319554,15929,17252,100705,14137,54403,14194,20537,66194,20775,12715,11636,67863,11676,235293,27402,17855,13807,208715,15357,78830,74754,67680,171210,78920,224530,11409,104112,15490,15488,230163,78801,26458,246787,17448,13595,18194,241612,14081,18642,109342,216019,15275,16987,110196,212032,68603,12709,192156,78070,12183,13360,57279,66445,67895
xolest_hs_c_228	Cholesteryl esters synthesis	59	151	0.390728	0.107532	0	13121,50799,22273,56421,319554,17252,100705,14137,54403,14194,20537,66194,20775,12715,11636,67863,11676,235293,27402,17855,13807,208715,15357,78830,74754,67680,171210,78920,224530,11428,11409,104112,15490,15488,230163,78801,26458,246787,17448,13595,18194,241612,14081,18642,109342,216019,15275,16987,110196,212032,68603,12709,192156,78070,12183,13360,57279,66445,67895
xolest_hs_c_130	Cholesteryl esters synthesis	60	154	0.38961	0.110355	0	13121,50799,22273,218756,56421,319554,76459,100705,14137,20544,14194,20537,66194,20775,12715,114479,11636,67863,11676,235293,27402,17855,13807,208715,15357,78830,74754,67680,171210,78920,224530,11428,11409,104112,15490,15488,230163,78801,26458,17448,13595,18194,14081,18642,216019,15275,16987,110196,212032,68603,12709,12351,192156,78070,12183,13360,57279,66445,67895,71934
xolest_hs_c_149	Cholesteryl esters synthesis	60	154	0.38961	0.110355	0	13121,50799,22273,56421,319554,76459,100705,14137,14194,20537,66194,20775,12715,11636,67863,11676,235293,27402,17855,13807,208715,15357,78830,74754,67680,171210,78920,224530,11428,11409,104112,15490,15488,230163,78801,26458,246787,17448,13595,18194,241612,14081,18642,109342,216019,15275,16987,110196,212032,68603,12709,12351,192156,78070,12183,13360,57279,66445,67895,71934
xolest_hs_c_163	Cholesteryl esters synthesis	60	154	0.38961	0.110355	0	13121,50799,22273,56421,319554,15929,76459,100705,14137,14194,20537,66194,20775,12715,11636,67863,11676,235293,27402,17855,13807,208715,15357,78830,74754,67680,171210,78920,224530,11409,104112,15490,15488,230163,78801,26458,246787,17448,13595,18194,241612,14081,18642,109342,216019,15275,16987,110196,212032,68603,12709,12351,192156,78070,12183,13360,57279,66445,67895,71934
xolest_hs_c_6	Cholesteryl esters synthesis	60	154	0.38961	0.110355	0	13121,50799,22273,56421,319554,15929,76459,100705,14137,14194,20537,66194,20775,12715,11636,67863,11676,235293,27402,17855,13807,208715,15357,78830,74754,67680,171210,78920,224530,11409,104112,15490,15488,230163,78801,26458,246787,17448,13595,18194,241612,14081,18642,109342,216019,15275,16987,110196,212032,68603,12709,12351,192156,78070,12183,13360,57279,66445,67895,71934
xolest_hs_c_106	Cholesteryl esters synthesis	61	157	0.388535	0.113155	0	13121,50799,22273,56421,319554,15929,76459,100705,14137,54403,14194,20537,66194,20775,12715,11636,67863,11676,235293,27402,17855,13807,208715,15357,78830,74754,67680,171210,78920,224530,11409,104112,15490,15488,230163,78801,26458,246787,17448,13595,18194,241612,14081,18642,109342,216019,15275,16987,110196,212032,68603,12709,12351,192156,78070,12183,13360,57279,66445,67895,71934
xolest_hs_c_177	Cholesteryl esters synthesis	61	157	0.388535	0.113155	0	13121,50799,22273,56421,319554,76459,100705,14137,54403,14194,20537,66194,20775,12715,11636,67863,11676,235293,27402,17855,13807,208715,15357,78830,74754,67680,171210,78920,224530,11428,11409,104112,15490,15488,230163,78801,26458,246787,17448,13595,18194,241612,14081,18642,109342,216019,15275,16987,110196,212032,68603,12709,12351,192156,78070,12183,13360,57279,66445,67895,71934
xolest_hs_c_20	Cholesteryl esters synthesis	61	157	0.388535	0.113155	0	13121,50799,22273,56421,319554,17252,76459,100705,14137,14194,20537,66194,20775,12715,11636,67863,11676,235293,27402,17855,13807,208715,15357,78830,74754,67680,171210,78920,224530,11428,11409,104112,15490,15488,230163,78801,26458,246787,17448,13595,18194,241612,14081,18642,109342,216019,15275,16987,110196,212032,68603,12709,12351,192156,78070,12183,13360,57279,66445,67895,71934
xolest_hs_c_215	Cholesteryl esters synthesis	61	157	0.388535	0.113155	0	13121,50799,22273,56421,319554,76459,100705,14137,54403,14194,20537,66194,20775,12715,11636,67863,11676,235293,27402,17855,13807,208715,15357,78830,74754,67680,171210,78920,224530,11428,11409,104112,15490,15488,230163,78801,26458,246787,17448,13595,18194,241612,14081,18642,109342,216019,15275,16987,110196,212032,68603,12709,12351,192156,78070,12183,13360,57279,66445,67895,71934
xolest_hs_c_217	Cholesteryl esters synthesis	61	157	0.388535	0.113155	0	13121,50799,22273,56421,319554,76459,100705,14137,54403,14194,20537,66194,20775,12715,11636,67863,11676,235293,27402,17855,13807,208715,15357,78830,74754,67680,171210,78920,224530,11428,11409,104112,15490,15488,230163,78801,26458,246787,17448,13595,18194,241612,14081,18642,109342,216019,15275,16987,110196,212032,68603,12709,12351,192156,78070,12183,13360,57279,66445,67895,71934
xolest_hs_c_9	Cholesteryl esters synthesis	61	157	0.388535	0.113155	0	13121,50799,22273,218756,56421,319554,15929,76459,100705,14137,54403,14194,66194,20775,12715,11636,67863,11676,235293,27402,17855,13807,208715,15357,78830,74754,67680,171210,78920,224530,11409,104112,15490,15488,230163,78801,26458,246787,17448,13595,18194,241612,14081,18642,109342,216019,15275,16987,110196,212032,68603,12709,12351,192156,78070,12183,13360,57279,66445,67895,71934
xolest_hs_c_28	Cholesteryl esters synthesis	57	146	0.390411	0.114004	0	13121,50799,22273,56421,319554,100705,14137,54403,14194,66194,20775,12715,11636,67863,11676,235293,27402,17855,13807,208715,15357,78830,74754,67680,171210,78920,224530,11428,11409,104112,15490,15488,230163,78801,26458,246787,17448,13595,18194,241612,14081,18642,109342,216019,15275,16987,110196,212032,68603,12709,192156,78070,12183,13360,57279,66445,67895
xolest_hs_c_133	Cholesteryl esters synthesis	62	160	0.3875	0.115933	0	13121,50799,22273,56421,319554,15929,17252,76459,100705,14137,14194,20537,66194,20775,12715,114479,11636,67863,11676,235293,27402,17855,13807,208715,15357,78830,74754,67680,171210,78920,224530,11409,104112,15490,15488,230163,78801,26458,246787,17448,13595,18194,241612,14081,18642,109342,216019,15275,16987,110196,212032,68603,12709,12351,192156,78070,12183,13360,57279,66445,67895,71934
xolest_hs_c_135	Cholesteryl esters synthesis	62	160	0.3875	0.115933	0	13121,50799,22273,56421,319554,17252,76459,100705,14137,54403,14194,20537,66194,20775,12715,11636,67863,11676,235293,27402,17855,13807,208715,15357,78830,74754,67680,171210,78920,224530,11428,11409,104112,15490,15488,230163,78801,26458,246787,17448,13595,18194,241612,14081,18642,109342,216019,15275,16987,110196,212032,68603,12709,12351,192156,78070,12183,13360,57279,66445,67895,71934
xolest_hs_c_17	Cholesteryl esters synthesis	62	160	0.3875	0.115933	0	13121,50799,22273,56421,319554,15929,17252,76459,100705,14137,14194,20537,66194,20775,12715,114479,11636,67863,11676,235293,27402,17855,13807,208715,15357,78830,74754,67680,171210,78920,224530,11409,104112,15490,15488,230163,78801,26458,246787,17448,13595,18194,241612,14081,18642,109342,216019,15275,16987,110196,212032,68603,12709,12351,192156,78070,12183,13360,57279,66445,67895,71934
xolest_hs_c_2	Cholesteryl esters synthesis	62	160	0.3875	0.115933	0	13121,50799,22273,56421,319554,15929,17252,76459,100705,14137,14194,20537,66194,20775,12715,114479,11636,67863,11676,235293,27402,17855,13807,208715,15357,78830,74754,67680,171210,78920,224530,11409,104112,15490,15488,230163,78801,26458,246787,17448,13595,18194,241612,14081,18642,109342,216019,15275,16987,110196,212032,68603,12709,12351,192156,78070,12183,13360,57279,66445,67895,71934
xolest_hs_c_140	Cholesteryl esters synthesis	58	149	0.389262	0.116982	0	13121,50799,22273,56421,319554,15929,76459,100705,14137,14194,20537,66194,20775,12715,114479,11636,67863,11676,235293,27402,17855,13807,208715,15357,78830,74754,67680,171210,78920,224530,11409,104112,15490,15488,230163,78801,26458,17448,13595,18194,14081,18642,216019,15275,16987,110196,212032,68603,12709,12351,192156,78070,12183,13360,57279,66445,67895,71934
xolest_hs_c_179	Cholesteryl esters synthesis	58	149	0.389262	0.116982	0	13121,50799,22273,56421,319554,15929,17252,100705,14137,54403,14194,20537,66194,20775,12715,114479,11636,67863,11676,235293,27402,17855,13807,208715,15357,78830,74754,67680,171210,78920,224530,11409,104112,15490,15488,230163,78801,26458,246787,17448,13595,18194,14081,18642,216019,15275,16987,110196,212032,68603,12709,192156,78070,12183,13360,57279,66445,67895
xolest_hs_c_37	Cholesteryl esters synthesis	58	149	0.389262	0.116982	0	13121,50799,22273,218756,56421,319554,17252,100705,14137,54403,14194,20537,66194,20775,12715,11636,67863,11676,235293,27402,17855,13807,208715,15357,78830,74754,67680,171210,78920,224530,11428,11409,104112,15490,15488,230163,107605,78801,26458,17448,13595,18194,14081,18642,216019,15275,16987,110196,212032,68603,12709,192156,78070,12183,13360,57279,66445,67895
xolest_hs_c_81	Cholesteryl esters synthesis	58	149	0.389262	0.116982	0	13121,50799,22273,218756,56421,319554,15929,100705,14137,14194,20537,66194,20775,12715,11636,67863,11676,235293,27402,17855,13807,208715,15357,78830,74754,67680,171210,78920,224530,11409,104112,15490,15488,230163,78801,26458,246787,17448,13595,18194,241612,14081,18642,109342,216019,15275,16987,110196,212032,68603,12709,192156,78070,12183,13360,57279,66445,67895
xolest_hs_c_41	Cholesteryl esters synthesis	63	163	0.386503	0.118688	0	13121,50799,22273,56421,319554,17252,76459,100705,14137,54403,14194,20537,66194,20775,12715,114479,11636,67863,11676,235293,27402,17855,13807,208715,15357,78830,74754,67680,171210,78920,224530,11428,11409,104112,15490,15488,230163,78801,26458,246787,17448,13595,18194,241612,14081,18642,109342,216019,15275,16987,110196,212032,68603,12709,12351,192156,78070,12183,13360,57279,66445,67895,71934
xolest_hs_c_209	Cholesteryl esters synthesis	59	152	0.388158	0.119932	0	13121,50799,22273,56421,319554,15929,17252,100705,14137,54403,14194,20537,66194,20775,12715,11636,67863,11676,235293,27402,17855,13807,208715,15357,78830,74754,67680,171210,78920,224530,11409,104112,15490,15488,230163,78801,26458,246787,17448,13595,18194,241612,14081,18642,109342,216019,15275,16987,110196,212032,68603,12709,192156,78070,12183,13360,57279,66445,67895
xolest_hs_c_46	Cholesteryl esters synthesis	59	152	0.388158	0.119932	0	13121,50799,22273,218756,56421,319554,100705,14137,54403,20544,14194,66194,20775,12715,11636,67863,11676,235293,27402,17855,13807,208715,15357,78830,74754,67680,171210,78920,224530,11428,11409,104112,15490,15488,230163,78801,26458,246787,17448,13595,18194,241612,14081,18642,109342,216019,15275,16987,110196,212032,68603,12709,192156,78070,12183,13360,57279,66445,67895
xolest_hs_c_94	Cholesteryl esters synthesis	59	152	0.388158	0.119932	0	13121,50799,22273,56421,319554,76459,100705,14137,20544,14194,20537,66194,20775,12715,11636,67863,11676,235293,27402,17855,13807,208715,15357,78830,74754,67680,171210,78920,224530,11428,11409,104112,15490,15488,230163,78801,26458,246787,17448,13595,18194,14081,18642,216019,15275,16987,110196,212032,68603,12709,12351,192156,78070,12183,13360,57279,66445,67895,71934
xolest_hs_c_189	Cholesteryl esters synthesis	64	166	0.385542	0.121421	0	13121,50799,22273,218756,56421,319554,17252,76459,100705,14137,54403,14194,20537,66194,20775,12715,11636,67863,11676,235293,27402,17855,13807,208715,15357,78830,74754,67680,171210,78920,224530,11428,11409,104112,15490,15488,230163,107605,78801,26458,246787,17448,13595,18194,241612,14081,18642,109342,216019,15275,16987,110196,212032,68603,12709,12351,192156,78070,12183,13360,57279,66445,67895,71934
xolest_hs_c_144	Cholesteryl esters synthesis	60	155	0.387097	0.122856	0	13121,50799,22273,218756,56421,319554,15929,17252,100705,14137,54403,14194,20537,66194,20775,12715,11636,67863,11676,235293,27402,17855,13807,208715,15357,78830,74754,67680,171210,78920,224530,11409,104112,15490,15488,230163,78801,26458,246787,17448,13595,18194,241612,14081,18642,109342,216019,15275,16987,110196,212032,68603,12709,192156,78070,12183,13360,57279,66445,67895
xolest_hs_c_145	Cholesteryl esters synthesis	60	155	0.387097	0.122856	0	13121,50799,22273,56421,319554,76459,100705,14137,54403,14194,66194,20775,12715,11636,67863,11676,235293,27402,17855,13807,208715,15357,78830,74754,67680,171210,78920,224530,11428,11409,104112,15490,15488,230163,78801,26458,246787,17448,13595,18194,241612,14081,18642,109342,216019,15275,16987,110196,212032,68603,12709,12351,192156,78070,12183,13360,57279,66445,67895,71934
xolest_hs_c_161	Cholesteryl esters synthesis	60	155	0.387097	0.122856	0	13121,50799,22273,56421,319554,15929,76459,100705,14137,14194,20537,66194,20775,12715,11636,67863,11676,235293,27402,17855,13807,208715,15357,78830,74754,67680,171210,78920,224530,11409,104112,15490,15488,230163,78801,26458,246787,17448,13595,18194,241612,14081,18642,109342,216019,15275,16987,110196,212032,68603,12709,12351,192156,78070,12183,13360,57279,66445,67895,71934
xolest_hs_c_172	Cholesteryl esters synthesis	60	155	0.387097	0.122856	0	13121,50799,22273,56421,319554,15929,76459,100705,14137,14194,20537,66194,20775,12715,11636,67863,11676,235293,27402,17855,13807,208715,15357,78830,74754,67680,171210,78920,224530,11409,104112,15490,15488,230163,78801,26458,246787,17448,13595,18194,241612,14081,18642,109342,216019,15275,16987,110196,212032,68603,12709,12351,192156,78070,12183,13360,57279,66445,67895,71934
xolest_hs_c_230	Cholesteryl esters synthesis	60	155	0.387097	0.122856	0	13121,50799,22273,56421,319554,76459,100705,14137,54403,14194,66194,20775,12715,11636,67863,11676,235293,27402,17855,13807,208715,15357,78830,74754,67680,171210,78920,224530,11428,11409,104112,15490,15488,230163,78801,26458,246787,17448,13595,18194,241612,14081,18642,109342,216019,15275,16987,110196,212032,68603,12709,12351,192156,78070,12183,13360,57279,66445,67895,71934
xolest_hs_c_233	Cholesteryl esters synthesis	60	155	0.387097	0.122856	0	13121,50799,22273,56421,319554,76459,100705,14137,14194,20537,66194,20775,12715,11636,67863,11676,235293,27402,17855,13807,208715,15357,78830,74754,67680,171210,78920,224530,11428,11409,104112,15490,15488,230163,78801,26458,246787,17448,13595,18194,241612,14081,18642,109342,216019,15275,16987,110196,212032,68603,12709,12351,192156,78070,12183,13360,57279,66445,67895,71934
xolest_hs_c_236	Cholesteryl esters synthesis	60	155	0.387097	0.122856	0	13121,50799,22273,218756,56421,319554,15929,76459,100705,14137,14194,66194,20775,12715,11636,67863,11676,235293,27402,17855,13807,208715,15357,78830,74754,67680,171210,78920,224530,11409,104112,15490,15488,230163,78801,26458,246787,17448,13595,18194,241612,14081,18642,109342,216019,15275,16987,110196,212032,68603,12709,12351,192156,78070,12183,13360,57279,66445,67895,71934
xolest_hs_c_31	Cholesteryl esters synthesis	60	155	0.387097	0.122856	0	13121,50799,22273,218756,56421,319554,15929,76459,100705,14137,14194,66194,20775,12715,11636,67863,11676,235293,27402,17855,13807,208715,15357,78830,74754,67680,171210,78920,224530,11409,104112,15490,15488,230163,78801,26458,246787,17448,13595,18194,241612,14081,18642,109342,216019,15275,16987,110196,212032,68603,12709,12351,192156,78070,12183,13360,57279,66445,67895,71934
xolest_hs_c_33	Cholesteryl esters synthesis	60	155	0.387097	0.122856	0	13121,50799,22273,56421,319554,76459,100705,14137,14194,20537,66194,20775,12715,11636,67863,11676,235293,27402,17855,13807,208715,15357,78830,74754,67680,171210,78920,224530,11428,11409,104112,15490,15488,230163,78801,26458,246787,17448,13595,18194,241612,14081,18642,109342,216019,15275,16987,110196,212032,68603,12709,12351,192156,78070,12183,13360,57279,66445,67895,71934
xolest_hs_c_40	Cholesteryl esters synthesis	60	155	0.387097	0.122856	0	13121,50799,22273,56421,319554,76459,100705,14137,14194,20537,66194,20775,12715,11636,67863,11676,235293,27402,17855,13807,208715,15357,78830,74754,67680,171210,78920,224530,11428,11409,104112,15490,15488,230163,78801,26458,246787,17448,13595,18194,241612,14081,18642,109342,216019,15275,16987,110196,212032,68603,12709,12351,192156,78070,12183,13360,57279,66445,67895,71934
xolest_hs_c_158	Cholesteryl esters synthesis	61	158	0.386076	0.125753	0	13121,50799,22273,56421,319554,76459,100705,14137,54403,14194,20537,66194,20775,12715,11636,67863,11676,235293,27402,17855,13807,208715,15357,78830,74754,67680,171210,78920,224530,11428,11409,104112,15490,15488,230163,78801,26458,246787,17448,13595,18194,241612,14081,18642,109342,216019,15275,16987,110196,212032,68603,12709,12351,192156,78070,12183,13360,57279,66445,67895,71934
xolest_hs_c_18	Cholesteryl esters synthesis	61	158	0.386076	0.125753	0	13121,50799,22273,56421,319554,17252,76459,100705,14137,14194,20537,66194,20775,12715,11636,67863,11676,235293,27402,17855,13807,208715,15357,78830,74754,67680,171210,78920,224530,11428,11409,104112,15490,15488,230163,78801,26458,246787,17448,13595,18194,241612,14081,18642,109342,216019,15275,16987,110196,212032,68603,12709,12351,192156,78070,12183,13360,57279,66445,67895,71934
xolest_hs_c_51	Cholesteryl esters synthesis	61	158	0.386076	0.125753	0	13121,50799,22273,56421,319554,17252,76459,100705,14137,14194,20537,66194,20775,12715,11636,67863,11676,235293,27402,17855,13807,208715,15357,78830,74754,67680,171210,78920,224530,11428,11409,104112,15490,15488,230163,78801,26458,246787,17448,13595,18194,241612,14081,18642,109342,216019,15275,16987,110196,212032,68603,12709,12351,192156,78070,12183,13360,57279,66445,67895,71934
xolest_hs_c_58	Cholesteryl esters synthesis	61	158	0.386076	0.125753	0	13121,50799,22273,56421,319554,17252,76459,100705,14137,14194,20537,66194,20775,12715,11636,67863,11676,235293,27402,17855,13807,208715,15357,78830,74754,67680,171210,78920,224530,11428,11409,104112,15490,15488,230163,78801,26458,246787,17448,13595,18194,241612,14081,18642,109342,216019,15275,16987,110196,212032,68603,12709,12351,192156,78070,12183,13360,57279,66445,67895,71934
xolest_hs_c_75	Cholesteryl esters synthesis	61	158	0.386076	0.125753	0	13121,50799,22273,56421,319554,15929,17252,76459,100705,14137,14194,20537,66194,20775,12715,11636,67863,11676,235293,27402,17855,13807,208715,15357,78830,74754,67680,171210,78920,224530,11409,104112,15490,15488,230163,78801,26458,246787,17448,13595,18194,241612,14081,18642,109342,216019,15275,16987,110196,212032,68603,12709,12351,192156,78070,12183,13360,57279,66445,67895,71934
xolest_hs_c_90	Cholesteryl esters synthesis	61	158	0.386076	0.125753	0	13121,50799,22273,56421,319554,76459,100705,14137,54403,14194,20537,66194,20775,12715,11636,67863,11676,235293,27402,17855,13807,208715,15357,78830,74754,67680,171210,78920,224530,11428,11409,104112,15490,15488,230163,78801,26458,246787,17448,13595,18194,241612,14081,18642,109342,216019,15275,16987,110196,212032,68603,12709,12351,192156,78070,12183,13360,57279,66445,67895,71934
xolest_hs_c_224	Cholesteryl esters synthesis	57	147	0.387755	0.127118	0	13121,50799,22273,56421,319554,15929,100705,14137,54403,14194,66194,20775,12715,11636,67863,11676,235293,27402,17855,13807,208715,15357,78830,74754,67680,171210,78920,224530,11409,104112,15490,15488,230163,78801,26458,246787,17448,13595,18194,241612,14081,18642,109342,216019,15275,16987,110196,212032,68603,12709,192156,78070,12183,13360,57279,66445,67895
xolest_hs_c_124	Cholesteryl esters synthesis	62	161	0.385093	0.128623	0	13121,50799,22273,218756,56421,319554,17252,76459,100705,14137,14194,20537,66194,20775,12715,11636,67863,11676,235293,27402,17855,13807,208715,15357,78830,74754,67680,171210,78920,224530,11428,11409,104112,15490,15488,230163,78801,26458,246787,17448,13595,18194,241612,14081,18642,109342,216019,15275,16987,110196,212032,68603,12709,12351,192156,78070,12183,13360,57279,66445,67895,71934
xolest_hs_c_7	Cholesteryl esters synthesis	62	161	0.385093	0.128623	0	13121,50799,22273,56421,319554,15929,17252,76459,100705,14137,54403,14194,20537,66194,20775,12715,11636,67863,11676,235293,27402,17855,13807,208715,15357,78830,74754,67680,171210,78920,224530,11409,104112,15490,15488,230163,78801,26458,246787,17448,13595,18194,241612,14081,18642,109342,216019,15275,16987,110196,212032,68603,12709,12351,192156,78070,12183,13360,57279,66445,67895,71934
xolest_hs_c_156	Cholesteryl esters synthesis	58	150	0.386667	0.130193	0	13121,50799,22273,218756,56421,319554,76459,100705,14137,14194,20537,66194,20775,12715,11636,67863,11676,235293,27402,17855,13807,208715,15357,78830,74754,67680,171210,78920,224530,11428,11409,104112,15490,15488,230163,78801,26458,17448,13595,18194,14081,18642,216019,15275,16987,110196,212032,68603,12709,12351,192156,78070,12183,13360,57279,66445,67895,71934
xolest_hs_c_160	Cholesteryl esters synthesis	58	150	0.386667	0.130193	0	13121,50799,22273,56421,319554,15929,100705,14137,54403,14194,20537,66194,20775,12715,11636,67863,11676,235293,27402,17855,13807,208715,15357,78830,74754,67680,171210,78920,224530,11409,104112,15490,15488,230163,78801,26458,246787,17448,13595,18194,241612,14081,18642,109342,216019,15275,16987,110196,212032,68603,12709,192156,78070,12183,13360,57279,66445,67895
xolest_hs_c_191	Cholesteryl esters synthesis	58	150	0.386667	0.130193	0	13121,50799,22273,56421,319554,15929,100705,14137,54403,14194,20537,66194,20775,12715,11636,67863,11676,235293,27402,17855,13807,208715,15357,78830,74754,67680,171210,78920,224530,11409,104112,15490,15488,230163,78801,26458,246787,17448,13595,18194,241612,14081,18642,109342,216019,15275,16987,110196,212032,68603,12709,192156,78070,12183,13360,57279,66445,67895
xolest_hs_c_197	Cholesteryl esters synthesis	58	150	0.386667	0.130193	0	13121,50799,22273,56421,319554,15929,100705,14137,54403,14194,20537,66194,20775,12715,11636,67863,11676,235293,27402,17855,13807,208715,15357,78830,74754,67680,171210,78920,224530,11409,104112,15490,15488,230163,78801,26458,246787,17448,13595,18194,241612,14081,18642,109342,216019,15275,16987,110196,212032,68603,12709,192156,78070,12183,13360,57279,66445,67895
xolest_hs_c_210	Cholesteryl esters synthesis	58	150	0.386667	0.130193	0	13121,50799,22273,56421,319554,15929,100705,14137,54403,14194,20537,66194,20775,12715,11636,67863,11676,235293,27402,17855,13807,208715,15357,78830,74754,67680,171210,78920,224530,11409,104112,15490,15488,230163,78801,26458,246787,17448,13595,18194,241612,14081,18642,109342,216019,15275,16987,110196,212032,68603,12709,192156,78070,12183,13360,57279,66445,67895
xolest_hs_c_53	Cholesteryl esters synthesis	58	150	0.386667	0.130193	0	13121,50799,22273,56421,319554,15929,100705,14137,54403,14194,20537,66194,20775,12715,11636,67863,11676,235293,27402,17855,13807,208715,15357,78830,74754,67680,171210,78920,224530,11409,104112,15490,15488,230163,78801,26458,246787,17448,13595,18194,241612,14081,18642,109342,216019,15275,16987,110196,212032,68603,12709,192156,78070,12183,13360,57279,66445,67895
xolest_hs_c_195	Cholesteryl esters synthesis	63	164	0.384146	0.131467	0	13121,50799,22273,56421,319554,15929,17252,76459,100705,14137,20544,14194,20537,66194,20775,12715,114479,11636,67863,11676,235293,27402,17855,13807,208715,15357,78830,74754,67680,171210,78920,224530,11409,104112,15490,15488,230163,78801,26458,246787,17448,13595,18194,241612,14081,18642,109342,216019,15275,16987,110196,212032,68603,12709,12351,192156,78070,12183,13360,57279,66445,67895,71934
xolest_hs_c_32	Cholesteryl esters synthesis	63	164	0.384146	0.131467	0	13121,50799,22273,218756,56421,319554,17252,76459,100705,14137,14194,20537,66194,20775,12715,11636,67863,11676,235293,27402,17855,13807,208715,15357,78830,74754,67680,171210,78920,224530,11428,11409,104112,15490,15488,230163,107605,78801,26458,246787,17448,13595,18194,241612,14081,18642,109342,216019,15275,16987,110196,212032,68603,12709,12351,192156,78070,12183,13360,57279,66445,67895,71934
xolest_hs_c_5	Cholesteryl esters synthesis	63	164	0.384146	0.131467	0	13121,50799,22273,56421,319554,17252,76459,100705,14137,20544,14194,20537,66194,20775,12715,114479,11636,67863,11676,235293,27402,17855,13807,208715,15357,78830,74754,67680,171210,78920,224530,11428,11409,104112,15490,15488,230163,78801,26458,246787,17448,13595,18194,241612,14081,18642,109342,216019,15275,16987,110196,212032,68603,12709,12351,192156,78070,12183,13360,57279,66445,67895,71934
xolest_hs_c_95	Cholesteryl esters synthesis	63	164	0.384146	0.131467	0	13121,50799,22273,56421,319554,15929,17252,76459,100705,14137,54403,14194,20537,66194,20775,12715,114479,11636,67863,11676,235293,27402,17855,13807,208715,15357,78830,74754,67680,171210,78920,224530,11409,104112,15490,15488,230163,78801,26458,246787,17448,13595,18194,241612,14081,18642,109342,216019,15275,16987,110196,212032,68603,12709,12351,192156,78070,12183,13360,57279,66445,67895,71934
xolest_hs_c_212	Cholesteryl esters synthesis	64	167	0.383234	0.134283	0	13121,50799,22273,56421,319554,15929,17252,76459,100705,14137,20544,14194,20537,66194,20775,12715,114479,11636,67863,11676,235293,27402,17855,13807,208715,15357,78830,74754,67680,171210,78920,224530,11409,104112,15490,15488,230163,107605,78801,26458,246787,17448,13595,18194,241612,14081,18642,109342,216019,15275,16987,110196,212032,68603,12709,12351,192156,78070,12183,13360,57279,66445,67895,71934
xolest_hs_c_112	Cholesteryl esters synthesis	60	156	0.384615	0.136249	0	13121,50799,22273,56421,319554,15929,76459,100705,14137,54403,14194,66194,20775,12715,11636,67863,11676,235293,27402,17855,13807,208715,15357,78830,74754,67680,171210,78920,224530,11409,104112,15490,15488,230163,78801,26458,246787,17448,13595,18194,241612,14081,18642,109342,216019,15275,16987,110196,212032,68603,12709,12351,192156,78070,12183,13360,57279,66445,67895,71934
xolest_hs_c_147	Cholesteryl esters synthesis	60	156	0.384615	0.136249	0	13121,50799,22273,218756,56421,319554,15929,76459,100705,14137,54403,20544,14194,66194,20775,12715,11636,67863,11676,235293,27402,17855,13807,208715,15357,78830,74754,67680,171210,78920,224530,11409,104112,15490,15488,230163,78801,26458,246787,17448,13595,18194,14081,18642,216019,15275,16987,110196,212032,68603,12709,12351,192156,78070,12183,13360,57279,66445,67895,71934
xolest_hs_c_15	Cholesteryl esters synthesis	60	156	0.384615	0.136249	0	13121,50799,22273,56421,319554,17252,100705,14137,54403,20544,14194,20537,66194,20775,12715,11636,67863,11676,235293,27402,17855,13807,208715,15357,78830,74754,67680,171210,78920,224530,11428,11409,104112,15490,15488,230163,78801,26458,246787,17448,13595,18194,241612,14081,18642,109342,216019,15275,16987,110196,212032,68603,12709,192156,78070,12183,13360,57279,66445,67895
xolest_hs_c_159	Cholesteryl esters synthesis	60	156	0.384615	0.136249	0	13121,50799,22273,218756,56421,319554,15929,17252,76459,100705,14137,14194,20537,66194,20775,12715,114479,11636,67863,11676,235293,27402,17855,13807,208715,15357,78830,74754,67680,171210,78920,224530,11409,104112,15490,15488,230163,78801,26458,17448,13595,18194,14081,18642,216019,15275,16987,110196,212032,68603,12709,12351,192156,78070,12183,13360,57279,66445,67895,71934
xolest_hs_c_169	Cholesteryl esters synthesis	60	156	0.384615	0.136249	0	13121,50799,22273,218756,56421,319554,15929,76459,100705,14137,14194,66194,20775,12715,11636,67863,11676,235293,27402,17855,13807,208715,15357,78830,74754,67680,171210,78920,224530,11409,104112,15490,15488,230163,78801,26458,246787,17448,13595,18194,241612,14081,18642,109342,216019,15275,16987,110196,212032,68603,12709,12351,192156,78070,12183,13360,57279,66445,67895,71934
xolest_hs_c_25	Cholesteryl esters synthesis	60	156	0.384615	0.136249	0	13121,50799,22273,56421,319554,15929,76459,100705,14137,14194,20537,66194,20775,12715,11636,67863,11676,235293,27402,17855,13807,208715,15357,78830,74754,67680,171210,78920,224530,11409,104112,15490,15488,230163,78801,26458,246787,17448,13595,18194,241612,14081,18642,109342,216019,15275,16987,110196,212032,68603,12709,12351,192156,78070,12183,13360,57279,66445,67895,71934
xolest_hs_c_74	Cholesteryl esters synthesis	60	156	0.384615	0.136249	0	13121,50799,22273,56421,319554,17252,76459,100705,14137,54403,14194,20537,66194,20775,12715,114479,11636,67863,11676,235293,27402,17855,13807,208715,15357,78830,74754,67680,171210,78920,224530,11428,11409,104112,15490,15488,230163,78801,26458,17448,13595,18194,14081,18642,216019,15275,16987,110196,212032,68603,12709,12351,192156,78070,12183,13360,57279,66445,67895,71934
xolest_hs_c_85	Cholesteryl esters synthesis	60	156	0.384615	0.136249	0	13121,50799,22273,56421,319554,15929,76459,100705,14137,54403,14194,66194,20775,12715,11636,67863,11676,235293,27402,17855,13807,208715,15357,78830,74754,67680,171210,78920,224530,11409,104112,15490,15488,230163,78801,26458,246787,17448,13595,18194,241612,14081,18642,109342,216019,15275,16987,110196,212032,68603,12709,12351,192156,78070,12183,13360,57279,66445,67895,71934
xolest_hs_c_11	Cholesteryl esters synthesis	61	159	0.383648	0.13923	0	13121,50799,22273,56421,319554,15929,76459,100705,14137,54403,14194,20537,66194,20775,12715,11636,67863,11676,235293,27402,17855,13807,208715,15357,78830,74754,67680,171210,78920,224530,11409,104112,15490,15488,230163,78801,26458,246787,17448,13595,18194,241612,14081,18642,109342,216019,15275,16987,110196,212032,68603,12709,12351,192156,78070,12183,13360,57279,66445,67895,71934
xolest_hs_c_132	Cholesteryl esters synthesis	61	159	0.383648	0.13923	0	13121,50799,22273,56421,319554,15929,17252,76459,100705,14137,14194,20537,66194,20775,12715,11636,67863,11676,235293,27402,17855,13807,208715,15357,78830,74754,67680,171210,78920,224530,11409,104112,15490,15488,230163,78801,26458,246787,17448,13595,18194,241612,14081,18642,109342,216019,15275,16987,110196,212032,68603,12709,12351,192156,78070,12183,13360,57279,66445,67895,71934
xolest_hs_c_185	Cholesteryl esters synthesis	61	159	0.383648	0.13923	0	13121,50799,22273,56421,319554,15929,17252,76459,100705,14137,14194,20537,66194,20775,12715,11636,67863,11676,235293,27402,17855,13807,208715,15357,78830,74754,67680,171210,78920,224530,11409,104112,15490,15488,230163,78801,26458,246787,17448,13595,18194,241612,14081,18642,109342,216019,15275,16987,110196,212032,68603,12709,12351,192156,78070,12183,13360,57279,66445,67895,71934
xolest_hs_c_232	Cholesteryl esters synthesis	61	159	0.383648	0.13923	0	13121,50799,22273,56421,319554,15929,76459,100705,14137,54403,14194,20537,66194,20775,12715,11636,67863,11676,235293,27402,17855,13807,208715,15357,78830,74754,67680,171210,78920,224530,11409,104112,15490,15488,230163,78801,26458,246787,17448,13595,18194,241612,14081,18642,109342,216019,15275,16987,110196,212032,68603,12709,12351,192156,78070,12183,13360,57279,66445,67895,71934
xolest_hs_c_45	Cholesteryl esters synthesis	61	159	0.383648	0.13923	0	13121,50799,22273,56421,319554,15929,76459,100705,14137,20544,14194,20537,66194,20775,12715,11636,67863,11676,235293,27402,17855,13807,208715,15357,78830,74754,67680,171210,78920,224530,11409,104112,15490,15488,230163,78801,26458,246787,17448,13595,18194,241612,14081,18642,109342,216019,15275,16987,110196,212032,68603,12709,12351,192156,78070,12183,13360,57279,66445,67895,71934
xolest_hs_c_63	Cholesteryl esters synthesis	61	159	0.383648	0.13923	0	13121,50799,22273,56421,319554,15929,76459,100705,14137,54403,14194,20537,66194,20775,12715,11636,67863,11676,235293,27402,17855,13807,208715,15357,78830,74754,67680,171210,78920,224530,11409,104112,15490,15488,230163,78801,26458,246787,17448,13595,18194,241612,14081,18642,109342,216019,15275,16987,110196,212032,68603,12709,12351,192156,78070,12183,13360,57279,66445,67895,71934
xolest_hs_c_71	Cholesteryl esters synthesis	61	159	0.383648	0.13923	0	13121,50799,22273,218756,56421,319554,15929,76459,100705,14137,54403,14194,66194,20775,12715,11636,67863,11676,235293,27402,17855,13807,208715,15357,78830,74754,67680,171210,78920,224530,11409,104112,15490,15488,230163,78801,26458,246787,17448,13595,18194,241612,14081,18642,109342,216019,15275,16987,110196,212032,68603,12709,12351,192156,78070,12183,13360,57279,66445,67895,71934
xolest_hs_c_146	Cholesteryl esters synthesis	57	148	0.385135	0.141167	0	13121,50799,22273,56421,319554,15929,100705,14137,54403,20544,14194,20537,66194,20775,12715,11636,67863,11676,235293,27402,17855,13807,208715,15357,78830,74754,67680,171210,78920,224530,11409,104112,15490,15488,230163,78801,26458,246787,17448,13595,18194,14081,18642,216019,15275,16987,110196,212032,68603,12709,192156,78070,12183,13360,57279,66445,67895
xolest_hs_c_126	Cholesteryl esters synthesis	62	162	0.382716	0.142179	0	13121,50799,22273,56421,319554,17252,76459,100705,14137,54403,14194,20537,66194,20775,12715,11636,67863,11676,235293,27402,17855,13807,208715,15357,78830,74754,67680,171210,78920,224530,11428,11409,104112,15490,15488,230163,78801,26458,246787,17448,13595,18194,241612,14081,18642,109342,216019,15275,16987,110196,212032,68603,12709,12351,192156,78070,12183,13360,57279,66445,67895,71934
xolest_hs_c_166	Cholesteryl esters synthesis	62	162	0.382716	0.142179	0	13121,50799,22273,218756,56421,319554,15929,17252,76459,100705,14137,14194,20537,66194,20775,12715,11636,67863,11676,235293,27402,17855,13807,208715,15357,78830,74754,67680,171210,78920,224530,11409,104112,15490,15488,230163,78801,26458,246787,17448,13595,18194,241612,14081,18642,109342,216019,15275,16987,110196,212032,68603,12709,12351,192156,78070,12183,13360,57279,66445,67895,71934
xolest_hs_c_167	Cholesteryl esters synthesis	62	162	0.382716	0.142179	0	13121,50799,22273,56421,319554,17252,76459,100705,14137,54403,14194,20537,66194,20775,12715,11636,67863,11676,235293,27402,17855,13807,208715,15357,78830,74754,67680,171210,78920,224530,11428,11409,104112,15490,15488,230163,78801,26458,246787,17448,13595,18194,241612,14081,18642,109342,216019,15275,16987,110196,212032,68603,12709,12351,192156,78070,12183,13360,57279,66445,67895,71934
xolest_hs_c_222	Cholesteryl esters synthesis	62	162	0.382716	0.142179	0	13121,50799,22273,218756,56421,319554,15929,17252,76459,100705,14137,14194,20537,66194,20775,12715,11636,67863,11676,235293,27402,17855,13807,208715,15357,78830,74754,67680,171210,78920,224530,11409,104112,15490,15488,230163,78801,26458,246787,17448,13595,18194,241612,14081,18642,109342,216019,15275,16987,110196,212032,68603,12709,12351,192156,78070,12183,13360,57279,66445,67895,71934
xolest_hs_c_26	Cholesteryl esters synthesis	62	162	0.382716	0.142179	0	13121,50799,22273,218756,56421,319554,17252,76459,100705,14137,14194,20537,66194,20775,12715,11636,67863,11676,235293,27402,17855,13807,208715,15357,78830,74754,67680,171210,78920,224530,11428,11409,104112,15490,15488,230163,78801,26458,246787,17448,13595,18194,241612,14081,18642,109342,216019,15275,16987,110196,212032,68603,12709,12351,192156,78070,12183,13360,57279,66445,67895,71934
xolest_hs_c_65	Cholesteryl esters synthesis	62	162	0.382716	0.142179	0	13121,50799,22273,56421,319554,17252,76459,100705,14137,54403,14194,20537,66194,20775,12715,11636,67863,11676,235293,27402,17855,13807,208715,15357,78830,74754,67680,171210,78920,224530,11428,11409,104112,15490,15488,230163,78801,26458,246787,17448,13595,18194,241612,14081,18642,109342,216019,15275,16987,110196,212032,68603,12709,12351,192156,78070,12183,13360,57279,66445,67895,71934
xolest_hs_c_137	Cholesteryl esters synthesis	58	151	0.384106	0.144326	0	13121,50799,22273,56421,319554,76459,100705,14137,14194,20537,66194,20775,12715,114479,11636,67863,11676,235293,27402,17855,13807,208715,15357,78830,74754,67680,171210,78920,224530,11428,11409,104112,15490,15488,230163,78801,26458,17448,13595,18194,14081,18642,216019,15275,16987,110196,212032,68603,12709,12351,192156,78070,12183,13360,57279,66445,67895,71934
xolest_hs_c_234	Cholesteryl esters synthesis	58	151	0.384106	0.144326	0	13121,50799,22273,56421,319554,76459,100705,14137,14194,20537,66194,20775,12715,11636,67863,11676,235293,27402,17855,13807,208715,15357,78830,74754,67680,171210,78920,224530,11428,11409,104112,15490,15488,230163,78801,26458,246787,17448,13595,18194,14081,18642,216019,15275,16987,110196,212032,68603,12709,12351,192156,78070,12183,13360,57279,66445,67895,71934
xolest_hs_c_110	Cholesteryl esters synthesis	63	165	0.381818	0.145098	0	13121,50799,22273,56421,319554,15929,17252,76459,100705,14137,54403,14194,20537,66194,20775,12715,114479,11636,67863,11676,235293,27402,17855,13807,208715,15357,78830,74754,67680,171210,78920,224530,11409,104112,15490,15488,230163,78801,26458,246787,17448,13595,18194,241612,14081,18642,109342,216019,15275,16987,110196,212032,68603,12709,12351,192156,78070,12183,13360,57279,66445,67895,71934
xolest_hs_c_69	Cholesteryl esters synthesis	63	165	0.381818	0.145098	0	13121,50799,22273,218756,56421,319554,17252,76459,100705,14137,54403,14194,66194,20775,12715,11636,67863,11676,235293,27402,17855,13807,208715,15357,78830,74754,67680,171210,78920,224530,11428,11409,104112,15490,15488,230163,107605,78801,26458,246787,17448,13595,18194,241612,14081,18642,109342,216019,15275,16987,110196,212032,68603,12709,12351,192156,78070,12183,13360,57279,66445,67895,71934
xolest_hs_c_155	Cholesteryl esters synthesis	59	154	0.383117	0.147448	0	13121,50799,22273,56421,319554,15929,17252,100705,14137,54403,14194,20537,66194,20775,12715,11636,67863,11676,235293,27402,17855,13807,208715,15357,78830,74754,67680,171210,78920,224530,11409,104112,15490,15488,230163,78801,26458,246787,17448,13595,18194,241612,14081,18642,109342,216019,15275,16987,110196,212032,68603,12709,192156,78070,12183,13360,57279,66445,67895
xolest_hs_c_186	Cholesteryl esters synthesis	59	154	0.383117	0.147448	0	13121,50799,22273,56421,319554,15929,17252,100705,14137,54403,20544,14194,20537,66194,20775,12715,114479,11636,67863,11676,235293,27402,17855,13807,208715,15357,78830,74754,67680,171210,78920,224530,11409,104112,15490,15488,230163,78801,26458,246787,17448,13595,18194,14081,18642,216019,15275,16987,110196,212032,68603,12709,192156,78070,12183,13360,57279,66445,67895
xolest_hs_c_227	Cholesteryl esters synthesis	59	154	0.383117	0.147448	0	13121,50799,22273,56421,319554,17252,100705,14137,54403,14194,20537,66194,20775,12715,11636,67863,11676,235293,27402,17855,13807,208715,15357,78830,74754,67680,171210,78920,224530,11428,11409,104112,15490,15488,230163,78801,26458,246787,17448,13595,18194,241612,14081,18642,109342,216019,15275,16987,110196,212032,68603,12709,192156,78070,12183,13360,57279,66445,67895
xolest_hs_c_29	Cholesteryl esters synthesis	59	154	0.383117	0.147448	0	13121,50799,22273,56421,319554,15929,76459,100705,14137,14194,66194,20775,12715,11636,67863,11676,235293,27402,17855,13807,208715,15357,78830,74754,67680,171210,78920,224530,11409,104112,15490,15488,230163,78801,26458,246787,17448,13595,18194,241612,14081,18642,109342,216019,15275,16987,110196,212032,68603,12709,12351,192156,78070,12183,13360,57279,66445,67895,71934
xolest_hs_c_68	Cholesteryl esters synthesis	59	154	0.383117	0.147448	0	13121,50799,22273,56421,319554,76459,100705,14137,14194,66194,20775,12715,11636,67863,11676,235293,27402,17855,13807,208715,15357,78830,74754,67680,171210,78920,224530,11428,11409,104112,15490,15488,230163,78801,26458,246787,17448,13595,18194,241612,14081,18642,109342,216019,15275,16987,110196,212032,68603,12709,12351,192156,78070,12183,13360,57279,66445,67895,71934
xolest_hs_c_116	Cholesteryl esters synthesis	60	157	0.382166	0.150534	0	13121,50799,22273,56421,319554,15929,76459,100705,14137,54403,14194,66194,20775,12715,11636,67863,11676,235293,27402,17855,13807,208715,15357,78830,74754,67680,171210,78920,224530,11409,104112,15490,15488,230163,78801,26458,246787,17448,13595,18194,241612,14081,18642,109342,216019,15275,16987,110196,212032,68603,12709,12351,192156,78070,12183,13360,57279,66445,67895,71934
xolest_hs_c_164	Cholesteryl esters synthesis	60	157	0.382166	0.150534	0	13121,50799,22273,218756,56421,319554,76459,100705,14137,20544,14194,20537,66194,20775,12715,114479,11636,67863,11676,235293,27402,17855,13807,208715,15357,78830,74754,67680,171210,78920,224530,11428,11409,104112,15490,15488,230163,78801,26458,17448,13595,18194,14081,18642,216019,15275,16987,110196,212032,68603,12709,12351,192156,78070,12183,13360,57279,66445,67895,71934
xolest_hs_c_175	Cholesteryl esters synthesis	60	157	0.382166	0.150534	0	13121,50799,22273,56421,319554,76459,100705,14137,54403,14194,66194,20775,12715,11636,67863,11676,235293,27402,17855,13807,208715,15357,78830,74754,67680,171210,78920,224530,11428,11409,104112,15490,15488,230163,78801,26458,246787,17448,13595,18194,241612,14081,18642,109342,216019,15275,16987,110196,212032,68603,12709,12351,192156,78070,12183,13360,57279,66445,67895,71934
xolest_hs_c_19	Cholesteryl esters synthesis	60	157	0.382166	0.150534	0	13121,50799,22273,56421,319554,15929,76459,100705,14137,14194,20537,66194,20775,12715,11636,67863,11676,235293,27402,17855,13807,208715,15357,78830,74754,67680,171210,78920,224530,11409,104112,15490,15488,230163,78801,26458,246787,17448,13595,18194,241612,14081,18642,109342,216019,15275,16987,110196,212032,68603,12709,12351,192156,78070,12183,13360,57279,66445,67895,71934
xolest_hs_c_109	Cholesteryl esters synthesis	57	149	0.38255	0.156152	0	13121,50799,22273,56421,319554,76459,100705,14137,14194,20537,66194,20775,12715,11636,67863,11676,235293,27402,17855,13807,208715,15357,78830,74754,67680,171210,78920,224530,11428,11409,104112,15490,15488,230163,78801,26458,17448,13595,18194,14081,18642,216019,15275,16987,110196,212032,68603,12709,12351,192156,78070,12183,13360,57279,66445,67895,71934
xolest_hs_c_125	Cholesteryl esters synthesis	57	149	0.38255	0.156152	0	13121,50799,22273,56421,319554,76459,100705,14137,14194,20537,66194,20775,12715,11636,67863,11676,235293,27402,17855,13807,208715,15357,78830,74754,67680,171210,78920,224530,11428,11409,104112,15490,15488,230163,78801,26458,17448,13595,18194,14081,18642,216019,15275,16987,110196,212032,68603,12709,12351,192156,78070,12183,13360,57279,66445,67895,71934
xolest_hs_c_199	Cholesteryl esters synthesis	57	149	0.38255	0.156152	0	13121,50799,22273,56421,319554,76459,100705,14137,14194,20537,66194,20775,12715,11636,67863,11676,235293,27402,17855,13807,208715,15357,78830,74754,67680,171210,78920,224530,11428,11409,104112,15490,15488,230163,78801,26458,17448,13595,18194,14081,18642,216019,15275,16987,110196,212032,68603,12709,12351,192156,78070,12183,13360,57279,66445,67895,71934
xolest_hs_c_205	Cholesteryl esters synthesis	57	149	0.38255	0.156152	0	13121,50799,22273,56421,319554,76459,100705,14137,14194,20537,66194,20775,12715,11636,67863,11676,235293,27402,17855,13807,208715,15357,78830,74754,67680,171210,78920,224530,11428,11409,104112,15490,15488,230163,78801,26458,17448,13595,18194,14081,18642,216019,15275,16987,110196,212032,68603,12709,12351,192156,78070,12183,13360,57279,66445,67895,71934
xolest_hs_c_52	Cholesteryl esters synthesis	57	149	0.38255	0.156152	0	13121,50799,22273,56421,319554,15929,17252,100705,14137,54403,14194,20537,66194,20775,12715,114479,11636,67863,11676,235293,27402,17855,13807,208715,15357,78830,74754,67680,171210,78920,224530,11409,104112,15490,15488,230163,78801,26458,17448,13595,18194,14081,18642,216019,15275,16987,110196,212032,68603,12709,192156,78070,12183,13360,57279,66445,67895
xolest_hs_c_108	Cholesteryl esters synthesis	62	163	0.380368	0.1566	0	13121,50799,22273,218756,56421,319554,15929,76459,100705,14137,20544,14194,20537,66194,20775,12715,11636,67863,11676,235293,27402,17855,13807,208715,15357,78830,74754,67680,171210,78920,224530,11409,104112,15490,15488,230163,78801,26458,246787,17448,13595,18194,241612,14081,18642,109342,216019,15275,16987,110196,212032,68603,12709,12351,192156,78070,12183,13360,57279,66445,67895,71934
xolest_hs_c_30	Cholesteryl esters synthesis	62	163	0.380368	0.1566	0	13121,50799,22273,56421,319554,15929,17252,76459,100705,14137,54403,20544,14194,20537,66194,20775,12715,114479,11636,67863,11676,235293,27402,17855,13807,208715,15357,78830,74754,67680,171210,78920,224530,11409,104112,15490,15488,230163,78801,26458,246787,17448,13595,18194,14081,18642,216019,15275,16987,110196,212032,68603,12709,12351,192156,78070,12183,13360,57279,66445,67895,71934
xolest_hs_c_35	Cholesteryl esters synthesis	62	163	0.380368	0.1566	0	13121,50799,22273,218756,56421,319554,15929,17252,76459,100705,14137,54403,14194,66194,20775,12715,11636,67863,11676,235293,27402,17855,13807,208715,15357,78830,74754,67680,171210,78920,224530,11409,104112,15490,15488,230163,78801,26458,246787,17448,13595,18194,241612,14081,18642,109342,216019,15275,16987,110196,212032,68603,12709,12351,192156,78070,12183,13360,57279,66445,67895,71934
xolest_hs_c_64	Cholesteryl esters synthesis	62	163	0.380368	0.1566	0	13121,50799,22273,218756,56421,319554,17252,76459,100705,14137,14194,66194,20775,12715,11636,67863,11676,235293,27402,17855,13807,208715,15357,78830,74754,67680,171210,78920,224530,11428,11409,104112,15490,15488,230163,107605,78801,26458,246787,17448,13595,18194,241612,14081,18642,109342,216019,15275,16987,110196,212032,68603,12709,12351,192156,78070,12183,13360,57279,66445,67895,71934
xolest_hs_c_91	Cholesteryl esters synthesis	62	163	0.380368	0.1566	0	13121,50799,22273,56421,319554,15929,17252,76459,100705,14137,54403,14194,20537,66194,20775,12715,11636,67863,11676,235293,27402,17855,13807,208715,15357,78830,74754,67680,171210,78920,224530,11409,104112,15490,15488,230163,78801,26458,246787,17448,13595,18194,241612,14081,18642,109342,216019,15275,16987,110196,212032,68603,12709,12351,192156,78070,12183,13360,57279,66445,67895,71934
xolest_hs_c_168	Cholesteryl esters synthesis	58	152	0.381579	0.159377	0	13121,50799,22273,56421,319554,15929,76459,100705,14137,54403,14194,20537,66194,20775,12715,11636,67863,11676,235293,27402,17855,13807,208715,15357,78830,74754,67680,171210,78920,224530,11409,104112,15490,15488,230163,78801,26458,17448,13595,18194,14081,18642,216019,15275,16987,110196,212032,68603,12709,12351,192156,78070,12183,13360,57279,66445,67895,71934
xolest_hs_c_196	Cholesteryl esters synthesis	58	152	0.381579	0.159377	0	13121,50799,22273,218756,56421,319554,17252,100705,14137,54403,20544,14194,20537,66194,20775,12715,11636,67863,11676,235293,27402,17855,13807,208715,15357,78830,74754,67680,171210,78920,224530,11428,11409,104112,15490,15488,230163,78801,26458,17448,13595,18194,14081,18642,216019,15275,16987,110196,212032,68603,12709,192156,78070,12183,13360,57279,66445,67895
xolest_hs_c_165	Cholesteryl esters synthesis	55	144	0.381944	0.165374	0	13121,50799,22273,56421,319554,15929,100705,14137,54403,14194,20537,66194,20775,12715,11636,67863,11676,235293,27402,17855,13807,208715,15357,78830,74754,67680,171210,78920,224530,11409,104112,15490,15488,230163,78801,26458,17448,13595,18194,14081,18642,216019,15275,16987,110196,212032,68603,12709,192156,78070,12183,13360,57279,66445,67895
xolest_hs_c_104	Cholesteryl esters synthesis	60	158	0.379747	0.165706	0	13121,50799,22273,56421,319554,15929,17252,76459,100705,14137,54403,14194,20537,66194,20775,12715,11636,67863,11676,235293,27402,17855,13807,208715,15357,78830,74754,67680,171210,78920,224530,11409,104112,15490,15488,230163,107605,78801,26458,17448,13595,18194,14081,18642,216019,15275,16987,110196,212032,68603,12709,12351,192156,78070,12183,13360,57279,66445,67895,71934
xolest_hs_c_153	Cholesteryl esters synthesis	60	158	0.379747	0.165706	0	13121,50799,22273,56421,319554,76459,100705,14137,20544,14194,66194,20775,12715,11636,67863,11676,235293,27402,17855,13807,208715,15357,78830,74754,67680,171210,78920,224530,11428,11409,104112,15490,15488,230163,78801,26458,246787,17448,13595,18194,241612,14081,18642,109342,216019,15275,16987,110196,212032,68603,12709,12351,192156,78070,12183,13360,57279,66445,67895,71934
xolest_hs_c_162	Cholesteryl esters synthesis	60	158	0.379747	0.165706	0	13121,50799,22273,56421,319554,15929,76459,100705,14137,54403,14194,66194,20775,12715,11636,67863,11676,235293,27402,17855,13807,208715,15357,78830,74754,67680,171210,78920,224530,11409,104112,15490,15488,230163,78801,26458,246787,17448,13595,18194,241612,14081,18642,109342,216019,15275,16987,110196,212032,68603,12709,12351,192156,78070,12183,13360,57279,66445,67895,71934
xolest_hs_c_78	Cholesteryl esters synthesis	60	158	0.379747	0.165706	0	13121,50799,22273,56421,319554,76459,100705,14137,20544,14194,66194,20775,12715,11636,67863,11676,235293,27402,17855,13807,208715,15357,78830,74754,67680,171210,78920,224530,11428,11409,104112,15490,15488,230163,78801,26458,246787,17448,13595,18194,241612,14081,18642,109342,216019,15275,16987,110196,212032,68603,12709,12351,192156,78070,12183,13360,57279,66445,67895,71934
xolest_hs_c_148	Cholesteryl esters synthesis	61	161	0.378882	0.168811	0	13121,50799,22273,56421,319554,15929,17252,76459,100705,14137,14194,20537,66194,20775,12715,11636,67863,11676,235293,27402,17855,13807,208715,15357,78830,74754,67680,171210,78920,224530,11409,104112,15490,15488,230163,78801,26458,246787,17448,13595,18194,241612,14081,18642,109342,216019,15275,16987,110196,212032,68603,12709,12351,192156,78070,12183,13360,57279,66445,67895,71934
xolest_hs_c_201	Cholesteryl esters synthesis	61	161	0.378882	0.168811	0	13121,50799,22273,218756,56421,319554,17252,100705,14137,54403,20544,14194,66194,20775,12715,11636,67863,11676,235293,27402,17855,13807,208715,15357,78830,74754,67680,171210,78920,224530,11428,11409,104112,15490,15488,230163,107605,78801,26458,246787,17448,13595,18194,241612,14081,18642,109342,216019,15275,16987,110196,212032,68603,12709,192156,78070,12183,13360,57279,66445,67895
xolest_hs_c_208	Cholesteryl esters synthesis	61	161	0.378882	0.168811	0	13121,50799,22273,56421,319554,15929,17252,76459,100705,14137,14194,20537,66194,20775,12715,11636,67863,11676,235293,27402,17855,13807,208715,15357,78830,74754,67680,171210,78920,224530,11409,104112,15490,15488,230163,78801,26458,246787,17448,13595,18194,241612,14081,18642,109342,216019,15275,16987,110196,212032,68603,12709,12351,192156,78070,12183,13360,57279,66445,67895,71934
xolest_hs_c_213	Cholesteryl esters synthesis	61	161	0.378882	0.168811	0	13121,50799,22273,56421,319554,17252,76459,100705,14137,54403,14194,66194,20775,12715,11636,67863,11676,235293,27402,17855,13807,208715,15357,78830,74754,67680,171210,78920,224530,11428,11409,104112,15490,15488,230163,78801,26458,246787,17448,13595,18194,241612,14081,18642,109342,216019,15275,16987,110196,212032,68603,12709,12351,192156,78070,12183,13360,57279,66445,67895,71934
xolest_hs_c_34	Cholesteryl esters synthesis	61	161	0.378882	0.168811	0	13121,50799,22273,56421,319554,17252,76459,100705,14137,20544,14194,20537,66194,20775,12715,114479,11636,67863,11676,235293,27402,17855,13807,208715,15357,78830,74754,67680,171210,78920,224530,11428,11409,104112,15490,15488,230163,78801,26458,246787,17448,13595,18194,14081,18642,216019,15275,16987,110196,212032,68603,12709,12351,192156,78070,12183,13360,57279,66445,67895,71934
xolest_hs_c_50	Cholesteryl esters synthesis	61	161	0.378882	0.168811	0	13121,50799,22273,56421,319554,17252,76459,100705,14137,20544,14194,20537,66194,20775,12715,114479,11636,67863,11676,235293,27402,17855,13807,208715,15357,78830,74754,67680,171210,78920,224530,11428,11409,104112,15490,15488,230163,78801,26458,246787,17448,13595,18194,14081,18642,216019,15275,16987,110196,212032,68603,12709,12351,192156,78070,12183,13360,57279,66445,67895,71934
xolest_hs_c_134	Cholesteryl esters synthesis	62	164	0.378049	0.171877	0	13121,50799,22273,56421,319554,15929,17252,76459,100705,14137,54403,14194,20537,66194,20775,12715,11636,67863,11676,235293,27402,17855,13807,208715,15357,78830,74754,67680,171210,78920,224530,11409,104112,15490,15488,230163,78801,26458,246787,17448,13595,18194,241612,14081,18642,109342,216019,15275,16987,110196,212032,68603,12709,12351,192156,78070,12183,13360,57279,66445,67895,71934
xolest_hs_c_87	Cholesteryl esters synthesis	62	164	0.378049	0.171877	0	13121,50799,22273,56421,319554,15929,17252,76459,100705,14137,14194,20537,66194,20775,12715,11636,67863,11676,235293,27402,17855,13807,208715,15357,78830,74754,67680,171210,78920,224530,11409,104112,15490,15488,230163,107605,78801,26458,246787,17448,13595,18194,241612,14081,18642,109342,216019,15275,16987,110196,212032,68603,12709,12351,192156,78070,12183,13360,57279,66445,67895,71934
xolest_hs_c_119	Cholesteryl esters synthesis	57	150	0.38	0.172062	0	13121,50799,22273,56421,319554,15929,76459,100705,14137,14194,20537,66194,20775,12715,11636,67863,11676,235293,27402,17855,13807,208715,15357,78830,74754,67680,171210,78920,224530,11409,104112,15490,15488,230163,78801,26458,17448,13595,18194,14081,18642,216019,15275,16987,110196,212032,68603,12709,12351,192156,78070,12183,13360,57279,66445,67895,71934
xolest_hs_c_131	Cholesteryl esters synthesis	57	150	0.38	0.172062	0	13121,50799,22273,218756,56421,319554,15929,100705,14137,54403,20544,14194,20537,66194,20775,12715,11636,67863,11676,235293,27402,17855,13807,208715,15357,78830,74754,67680,171210,78920,224530,11409,104112,15490,15488,230163,78801,26458,17448,13595,18194,14081,18642,216019,15275,16987,110196,212032,68603,12709,192156,78070,12183,13360,57279,66445,67895
xolest_hs_c_150	Cholesteryl esters synthesis	57	150	0.38	0.172062	0	13121,50799,22273,56421,319554,76459,100705,14137,14194,20537,66194,20775,12715,11636,67863,11676,235293,27402,17855,13807,208715,15357,78830,74754,67680,171210,78920,224530,11428,11409,104112,15490,15488,230163,78801,26458,17448,13595,18194,14081,18642,216019,15275,16987,110196,212032,68603,12709,12351,192156,78070,12183,13360,57279,66445,67895,71934
xolest_hs_c_24	Cholesteryl esters synthesis	57	150	0.38	0.172062	0	13121,50799,22273,56421,319554,17252,100705,14137,54403,14194,20537,66194,20775,12715,11636,67863,11676,235293,27402,17855,13807,208715,15357,78830,74754,67680,171210,78920,224530,11428,11409,104112,15490,15488,230163,78801,26458,246787,17448,13595,18194,14081,18642,216019,15275,16987,110196,212032,68603,12709,192156,78070,12183,13360,57279,66445,67895
xolest_hs_c_194	Cholesteryl esters synthesis	58	153	0.379085	0.175337	0	13121,50799,22273,56421,319554,15929,100705,14137,54403,20544,14194,66194,20775,12715,11636,67863,11676,235293,27402,17855,13807,208715,15357,78830,74754,67680,171210,78920,224530,11409,104112,15490,15488,230163,78801,26458,246787,17448,13595,18194,241612,14081,18642,109342,216019,15275,16987,110196,212032,68603,12709,192156,78070,12183,13360,57279,66445,67895
xolest_hs_c_211	Cholesteryl esters synthesis	58	153	0.379085	0.175337	0	13121,50799,22273,56421,319554,17252,100705,14137,54403,14194,66194,20775,12715,11636,67863,11676,235293,27402,17855,13807,208715,15357,78830,74754,67680,171210,78920,224530,11428,11409,104112,15490,15488,230163,78801,26458,246787,17448,13595,18194,241612,14081,18642,109342,216019,15275,16987,110196,212032,68603,12709,192156,78070,12183,13360,57279,66445,67895
xolest_hs_c_221	Cholesteryl esters synthesis	58	153	0.379085	0.175337	0	13121,50799,22273,56421,319554,17252,100705,14137,54403,14194,66194,20775,12715,11636,67863,11676,235293,27402,17855,13807,208715,15357,78830,74754,67680,171210,78920,224530,11428,11409,104112,15490,15488,230163,78801,26458,246787,17448,13595,18194,241612,14081,18642,109342,216019,15275,16987,110196,212032,68603,12709,192156,78070,12183,13360,57279,66445,67895
xolest_hs_c_23	Cholesteryl esters synthesis	59	156	0.378205	0.178566	0	13121,50799,22273,56421,319554,76459,100705,14137,54403,20544,14194,20537,66194,20775,12715,11636,67863,11676,235293,27402,17855,13807,208715,15357,78830,74754,67680,171210,78920,224530,11428,11409,104112,15490,15488,230163,78801,26458,17448,13595,18194,14081,18642,216019,15275,16987,110196,212032,68603,12709,12351,192156,78070,12183,13360,57279,66445,67895,71934
xolest_hs_c_49	Cholesteryl esters synthesis	59	156	0.378205	0.178566	0	13121,50799,22273,56421,319554,15929,76459,100705,14137,54403,14194,20537,66194,20775,12715,114479,11636,67863,11676,235293,27402,17855,13807,208715,15357,78830,74754,67680,171210,78920,224530,11409,104112,15490,15488,230163,78801,26458,17448,13595,18194,14081,18642,216019,15275,16987,110196,212032,68603,12709,12351,192156,78070,12183,13360,57279,66445,67895,71934
xolest_hs_c_88	Cholesteryl esters synthesis	59	156	0.378205	0.178566	0	13121,50799,22273,56421,319554,76459,100705,14137,20544,14194,20537,66194,20775,12715,114479,11636,67863,11676,235293,27402,17855,13807,208715,15357,78830,74754,67680,171210,78920,224530,11428,11409,104112,15490,15488,230163,78801,26458,17448,13595,18194,14081,18642,216019,15275,16987,110196,212032,68603,12709,12351,192156,78070,12183,13360,57279,66445,67895,71934
xolest_hs_c_14	Cholesteryl esters synthesis	60	159	0.377358	0.181752	0	13121,50799,22273,56421,319554,17252,76459,100705,14137,14194,66194,20775,12715,11636,67863,11676,235293,27402,17855,13807,208715,15357,78830,74754,67680,171210,78920,224530,11428,11409,104112,15490,15488,230163,78801,26458,246787,17448,13595,18194,241612,14081,18642,109342,216019,15275,16987,110196,212032,68603,12709,12351,192156,78070,12183,13360,57279,66445,67895,71934
xolest_hs_c_174	Cholesteryl esters synthesis	60	159	0.377358	0.181752	0	13121,50799,22273,218756,56421,319554,15929,76459,100705,14137,20544,14194,20537,66194,20775,12715,11636,67863,11676,235293,27402,17855,13807,208715,15357,78830,74754,67680,171210,78920,224530,11409,104112,15490,15488,230163,78801,26458,246787,17448,13595,18194,14081,18642,216019,15275,16987,110196,212032,68603,12709,12351,192156,78070,12183,13360,57279,66445,67895,71934
xolest_hs_c_118	Cholesteryl esters synthesis	61	162	0.376543	0.184895	0	13121,50799,22273,56421,319554,15929,76459,100705,14137,20544,14194,20537,66194,20775,12715,11636,67863,11676,235293,27402,17855,13807,208715,15357,78830,74754,67680,171210,78920,224530,11409,104112,15490,15488,230163,78801,26458,246787,17448,13595,18194,241612,14081,18642,109342,216019,15275,16987,110196,212032,68603,12709,12351,192156,78070,12183,13360,57279,66445,67895,71934
xolest_hs_c_237	Cholesteryl esters synthesis	61	162	0.376543	0.184895	0	13121,50799,22273,56421,319554,15929,17252,76459,100705,14137,14194,20537,66194,20775,12715,11636,67863,11676,235293,27402,17855,13807,208715,15357,78830,74754,67680,171210,78920,224530,11409,104112,15490,15488,230163,78801,26458,246787,17448,13595,18194,241612,14081,18642,109342,216019,15275,16987,110196,212032,68603,12709,12351,192156,78070,12183,13360,57279,66445,67895,71934
xolest_hs_c_76	Cholesteryl esters synthesis	61	162	0.376543	0.184895	0	13121,50799,22273,56421,319554,15929,17252,76459,100705,14137,54403,14194,66194,20775,12715,11636,67863,11676,235293,27402,17855,13807,208715,15357,78830,74754,67680,171210,78920,224530,11409,104112,15490,15488,230163,78801,26458,246787,17448,13595,18194,241612,14081,18642,109342,216019,15275,16987,110196,212032,68603,12709,12351,192156,78070,12183,13360,57279,66445,67895,71934
xolest_hs_c_98	Cholesteryl esters synthesis	61	162	0.376543	0.184895	0	13121,50799,22273,56421,319554,15929,17252,76459,100705,14137,54403,14194,66194,20775,12715,11636,67863,11676,235293,27402,17855,13807,208715,15357,78830,74754,67680,171210,78920,224530,11409,104112,15490,15488,230163,78801,26458,246787,17448,13595,18194,241612,14081,18642,109342,216019,15275,16987,110196,212032,68603,12709,12351,192156,78070,12183,13360,57279,66445,67895,71934
xolest_hs_c_113	Cholesteryl esters synthesis	56	148	0.378378	0.185526	0	13121,50799,22273,56421,319554,15929,100705,14137,54403,20544,14194,20537,66194,20775,12715,11636,67863,11676,235293,27402,17855,13807,208715,15357,78830,74754,67680,171210,78920,224530,11409,104112,15490,15488,230163,78801,26458,17448,13595,18194,14081,18642,216019,15275,16987,110196,212032,68603,12709,192156,78070,12183,13360,57279,66445,67895
xolest_hs_c_142	Cholesteryl esters synthesis	56	148	0.378378	0.185526	0	13121,50799,22273,218756,56421,319554,15929,17252,100705,14137,14194,20537,66194,20775,12715,11636,67863,11676,235293,27402,17855,13807,208715,15357,78830,74754,67680,171210,78920,224530,11409,104112,15490,15488,230163,78801,26458,17448,13595,18194,14081,18642,216019,15275,16987,110196,212032,68603,12709,192156,78070,12183,13360,57279,66445,67895
xolest_hs_c_120	Cholesteryl esters synthesis	62	165	0.375758	0.187996	0	13121,50799,22273,218756,56421,319554,17252,76459,100705,14137,20544,14194,66194,20775,12715,11636,67863,11676,235293,27402,17855,13807,208715,15357,78830,74754,67680,171210,78920,224530,11428,11409,104112,15490,15488,230163,78801,26458,246787,17448,13595,18194,241612,14081,18642,109342,216019,15275,16987,110196,212032,68603,12709,12351,192156,78070,12183,13360,57279,66445,67895,71934
xolest_hs_c_121	Cholesteryl esters synthesis	63	168	0.375	0.191055	0	13121,50799,22273,56421,319554,17252,76459,100705,14137,20544,14194,20537,66194,20775,12715,11636,67863,11676,235293,27402,17855,13807,208715,15357,78830,74754,67680,171210,78920,224530,11428,11409,104112,15490,15488,230163,107605,78801,26458,246787,17448,13595,18194,241612,14081,18642,109342,216019,15275,16987,110196,212032,68603,12709,12351,192156,78070,12183,13360,57279,66445,67895,71934
xolest_hs_c_182	Cholesteryl esters synthesis	63	168	0.375	0.191055	0	13121,50799,22273,218756,56421,319554,17252,76459,100705,14137,54403,20544,14194,66194,20775,12715,11636,67863,11676,235293,27402,17855,13807,208715,15357,78830,74754,67680,171210,78920,224530,11428,11409,104112,15490,15488,230163,78801,26458,246787,17448,13595,18194,241612,14081,18642,109342,216019,15275,16987,110196,212032,68603,12709,12351,192156,78070,12183,13360,57279,66445,67895,71934
xolest_hs_c_27	Cholesteryl esters synthesis	58	154	0.376623	0.192186	0	13121,50799,22273,56421,319554,76459,100705,14137,20544,14194,20537,66194,20775,12715,11636,67863,11676,235293,27402,17855,13807,208715,15357,78830,74754,67680,171210,78920,224530,11428,11409,104112,15490,15488,230163,78801,26458,17448,13595,18194,14081,18642,216019,15275,16987,110196,212032,68603,12709,12351,192156,78070,12183,13360,57279,66445,67895,71934
xolest_hs_c_117	Cholesteryl esters synthesis	59	157	0.375796	0.195443	0	13121,50799,22273,56421,319554,17252,76459,100705,14137,14194,20537,66194,20775,12715,11636,67863,11676,235293,27402,17855,13807,208715,15357,78830,74754,67680,171210,78920,224530,11428,11409,104112,15490,15488,230163,78801,26458,246787,17448,13595,18194,14081,18642,216019,15275,16987,110196,212032,68603,12709,12351,192156,78070,12183,13360,57279,66445,67895,71934
xolest_hs_c_43	Cholesteryl esters synthesis	59	157	0.375796	0.195443	0	13121,50799,22273,56421,319554,15929,76459,100705,14137,54403,20544,14194,66194,20775,12715,11636,67863,11676,235293,27402,17855,13807,208715,15357,78830,74754,67680,171210,78920,224530,11409,104112,15490,15488,230163,78801,26458,246787,17448,13595,18194,14081,18642,216019,15275,16987,110196,212032,68603,12709,12351,192156,78070,12183,13360,57279,66445,67895,71934
xolest_hs_c_57	Cholesteryl esters synthesis	59	157	0.375796	0.195443	0	13121,50799,22273,56421,319554,17252,76459,100705,14137,54403,14194,20537,66194,20775,12715,11636,67863,11676,235293,27402,17855,13807,208715,15357,78830,74754,67680,171210,78920,224530,11428,11409,104112,15490,15488,230163,78801,26458,17448,13595,18194,14081,18642,216019,15275,16987,110196,212032,68603,12709,12351,192156,78070,12183,13360,57279,66445,67895,71934
xolest_hs_c_73	Cholesteryl esters synthesis	59	157	0.375796	0.195443	0	13121,50799,22273,56421,319554,15929,76459,100705,14137,20544,14194,20537,66194,20775,12715,114479,11636,67863,11676,235293,27402,17855,13807,208715,15357,78830,74754,67680,171210,78920,224530,11409,104112,15490,15488,230163,78801,26458,17448,13595,18194,14081,18642,216019,15275,16987,110196,212032,68603,12709,12351,192156,78070,12183,13360,57279,66445,67895,71934
xolest_hs_c_202	Cholesteryl esters synthesis	60	160	0.375	0.198653	0	13121,50799,22273,56421,319554,76459,100705,14137,20544,14194,66194,20775,12715,11636,67863,11676,235293,27402,17855,13807,208715,15357,78830,74754,67680,171210,78920,224530,11428,11409,104112,15490,15488,230163,78801,26458,246787,17448,13595,18194,241612,14081,18642,109342,216019,15275,16987,110196,212032,68603,12709,12351,192156,78070,12183,13360,57279,66445,67895,71934
xolest_hs_c_8	Cholesteryl esters synthesis	61	163	0.374233	0.201817	0	13121,50799,22273,56421,319554,15929,17252,76459,100705,14137,54403,20544,14194,20537,66194,20775,12715,114479,11636,67863,11676,235293,27402,17855,13807,208715,15357,78830,74754,67680,171210,78920,224530,11409,104112,15490,15488,230163,78801,26458,17448,13595,18194,14081,18642,216019,15275,16987,110196,212032,68603,12709,12351,192156,78070,12183,13360,57279,66445,67895,71934
xolest_hs_c_83	Cholesteryl esters synthesis	56	149	0.375839	0.203213	0	13121,50799,22273,56421,319554,100705,14137,54403,20544,14194,66194,20775,12715,11636,67863,11676,235293,27402,17855,13807,208715,15357,78830,74754,67680,171210,78920,224530,11428,11409,104112,15490,15488,230163,78801,26458,246787,17448,13595,18194,14081,18642,216019,15275,16987,110196,212032,68603,12709,192156,78070,12183,13360,57279,66445,67895
xolest_hs_c_1	Cholesteryl esters synthesis	57	152	0.375	0.206582	0	13121,50799,22273,218756,56421,319554,17252,100705,14137,20544,14194,20537,66194,20775,12715,11636,67863,11676,235293,27402,17855,13807,208715,15357,78830,74754,67680,171210,78920,224530,11428,11409,104112,15490,15488,230163,78801,26458,17448,13595,18194,14081,18642,216019,15275,16987,110196,212032,68603,12709,192156,78070,12183,13360,57279,66445,67895
xolest_hs_c_128	Cholesteryl esters synthesis	63	169	0.372781	0.208011	0	13121,50799,22273,56421,319554,15929,17252,76459,100705,14137,20544,14194,20537,66194,20775,12715,11636,67863,11676,235293,27402,17855,13807,208715,15357,78830,74754,67680,171210,78920,224530,11409,104112,15490,15488,230163,107605,78801,26458,246787,17448,13595,18194,241612,14081,18642,109342,216019,15275,16987,110196,212032,68603,12709,12351,192156,78070,12183,13360,57279,66445,67895,71934
xolest_hs_c_122	Cholesteryl esters synthesis	58	155	0.374194	0.209899	0	13121,50799,22273,56421,319554,15929,76459,100705,14137,20544,14194,66194,20775,12715,11636,67863,11676,235293,27402,17855,13807,208715,15357,78830,74754,67680,171210,78920,224530,11409,104112,15490,15488,230163,78801,26458,246787,17448,13595,18194,14081,18642,216019,15275,16987,110196,212032,68603,12709,12351,192156,78070,12183,13360,57279,66445,67895,71934
xolest_hs_c_207	Cholesteryl esters synthesis	58	155	0.374194	0.209899	0	13121,50799,22273,56421,319554,15929,76459,100705,14137,20544,14194,20537,66194,20775,12715,11636,67863,11676,235293,27402,17855,13807,208715,15357,78830,74754,67680,171210,78920,224530,11409,104112,15490,15488,230163,78801,26458,17448,13595,18194,14081,18642,216019,15275,16987,110196,212032,68603,12709,12351,192156,78070,12183,13360,57279,66445,67895,71934
xolest_hs_c_136	Cholesteryl esters synthesis	59	158	0.373418	0.213165	0	13121,50799,22273,56421,319554,15929,76459,100705,14137,54403,20544,14194,66194,20775,12715,11636,67863,11676,235293,27402,17855,13807,208715,15357,78830,74754,67680,171210,78920,224530,11409,104112,15490,15488,230163,78801,26458,246787,17448,13595,18194,14081,18642,216019,15275,16987,110196,212032,68603,12709,12351,192156,78070,12183,13360,57279,66445,67895,71934
xolest_hs_c_154	Cholesteryl esters synthesis	59	158	0.373418	0.213165	0	13121,50799,22273,56421,319554,76459,100705,14137,54403,20544,14194,66194,20775,12715,11636,67863,11676,235293,27402,17855,13807,208715,15357,78830,74754,67680,171210,78920,224530,11428,11409,104112,15490,15488,230163,78801,26458,246787,17448,13595,18194,14081,18642,216019,15275,16987,110196,212032,68603,12709,12351,192156,78070,12183,13360,57279,66445,67895,71934
xolest_hs_c_143	Cholesteryl esters synthesis	62	167	0.371257	0.222668	0	13121,50799,22273,56421,319554,17252,76459,100705,14137,54403,20544,14194,66194,20775,12715,11636,67863,11676,235293,27402,17855,13807,208715,15357,78830,74754,67680,171210,78920,224530,11428,11409,104112,15490,15488,230163,78801,26458,246787,17448,13595,18194,241612,14081,18642,109342,216019,15275,16987,110196,212032,68603,12709,12351,192156,78070,12183,13360,57279,66445,67895,71934
h2o2_m_13	Hydrogen peroxide synthesis	23	58	0.396552	0.224294	0	218756,76459,20537,114479,11676,13807,66171,14120,230163,246787,110208,241612,74419,109342,216019,15275,212032,21881,52815,12351,12183,21351,71934
h2o2_m_5	Hydrogen peroxide synthesis	23	58	0.396552	0.224294	0	218756,76459,20537,114479,11676,13807,66171,14120,230163,246787,110208,241612,74419,109342,216019,15275,212032,21881,52815,12351,12183,21351,71934
xolest_hs_c_66	Cholesteryl esters synthesis	58	156	0.371795	0.228443	0	13121,50799,22273,56421,319554,17252,76459,100705,14137,14194,20537,66194,20775,12715,11636,67863,11676,235293,27402,17855,13807,208715,15357,78830,74754,67680,171210,78920,224530,11428,11409,104112,15490,15488,230163,78801,26458,17448,13595,18194,14081,18642,216019,15275,16987,110196,212032,68603,12709,12351,192156,78070,12183,13360,57279,66445,67895,71934
xolest_hs_c_12	Cholesteryl esters synthesis	59	159	0.371069	0.231698	0	13121,50799,22273,56421,319554,15929,17252,100705,14137,54403,20544,14194,20537,66194,20775,12715,114479,11636,67863,11676,235293,27402,17855,13807,208715,15357,78830,74754,67680,171210,78920,224530,11409,104112,15490,15488,230163,107605,78801,26458,17448,13595,18194,14081,18642,216019,15275,16987,110196,212032,68603,12709,192156,78070,12183,13360,57279,66445,67895
xolest_hs_c_44	Cholesteryl esters synthesis	59	159	0.371069	0.231698	0	13121,50799,22273,56421,319554,15929,17252,76459,100705,14137,14194,20537,66194,20775,12715,114479,11636,67863,11676,235293,27402,17855,13807,208715,15357,78830,74754,67680,171210,78920,224530,11409,104112,15490,15488,230163,78801,26458,17448,13595,18194,14081,18642,216019,15275,16987,110196,212032,68603,12709,12351,192156,78070,12183,13360,57279,66445,67895,71934
xolest_hs_c_3	Cholesteryl esters synthesis	60	162	0.37037	0.234902	0	13121,50799,22273,56421,319554,17252,76459,100705,14137,54403,20544,14194,20537,66194,20775,12715,11636,67863,11676,235293,27402,17855,13807,208715,15357,78830,74754,67680,171210,78920,224530,11428,11409,104112,15490,15488,230163,78801,26458,17448,13595,18194,14081,18642,216019,15275,16987,110196,212032,68603,12709,12351,192156,78070,12183,13360,57279,66445,67895,71934
xolest_hs_c_54	Cholesteryl esters synthesis	58	157	0.369427	0.247777	0	13121,50799,22273,56421,319554,15929,76459,100705,14137,20544,14194,20537,66194,20775,12715,11636,67863,11676,235293,27402,17855,13807,208715,15357,78830,74754,67680,171210,78920,224530,11409,104112,15490,15488,230163,78801,26458,17448,13595,18194,14081,18642,216019,15275,16987,110196,212032,68603,12709,12351,192156,78070,12183,13360,57279,66445,67895,71934
xolest_hs_c_82	Cholesteryl esters synthesis	60	163	0.368098	0.254175	0	13121,50799,22273,56421,319554,15929,17252,76459,100705,14137,20544,14194,20537,66194,20775,12715,114479,11636,67863,11676,235293,27402,17855,13807,208715,15357,78830,74754,67680,171210,78920,224530,11409,104112,15490,15488,230163,78801,26458,17448,13595,18194,14081,18642,216019,15275,16987,110196,212032,68603,12709,12351,192156,78070,12183,13360,57279,66445,67895,71934
h2o2_m_106	Hydrogen peroxide synthesis	23	59	0.389831	0.255417	0	76459,54403,20537,114479,11676,13807,66171,14120,230163,246787,110208,241612,74419,109342,216019,15275,212032,21881,52815,12351,12183,21351,71934
h2o2_m_108	Hydrogen peroxide synthesis	23	59	0.389831	0.255417	0	76459,54403,20537,114479,11676,13807,66171,14120,230163,246787,110208,241612,74419,109342,216019,15275,212032,21881,52815,12351,12183,21351,71934
h2o2_m_119	Hydrogen peroxide synthesis	23	59	0.389831	0.255417	0	76459,54403,20537,114479,11676,13807,66171,14120,230163,246787,110208,241612,74419,109342,216019,15275,212032,21881,52815,12351,12183,21351,71934
h2o2_m_23	Hydrogen peroxide synthesis	23	59	0.389831	0.255417	0	76459,54403,20537,114479,11676,13807,66171,14120,230163,246787,110208,241612,74419,109342,216019,15275,212032,21881,52815,12351,12183,21351,71934
h2o2_m_33	Hydrogen peroxide synthesis	23	59	0.389831	0.255417	0	76459,54403,20537,114479,11676,13807,66171,14120,230163,246787,110208,241612,74419,109342,216019,15275,212032,21881,52815,12351,12183,21351,71934
h2o2_m_52	Hydrogen peroxide synthesis	23	59	0.389831	0.255417	0	218756,76459,54403,20537,11676,13807,66171,14120,230163,246787,110208,241612,74419,109342,216019,15275,212032,21881,52815,12351,12183,21351,71934
h2o2_m_63	Hydrogen peroxide synthesis	23	59	0.389831	0.255417	0	218756,76459,54403,20537,11676,13807,66171,14120,230163,246787,110208,241612,74419,109342,216019,15275,212032,21881,52815,12351,12183,21351,71934
h2o2_m_64	Hydrogen peroxide synthesis	23	59	0.389831	0.255417	0	76459,54403,20537,114479,11676,13807,66171,14120,230163,246787,110208,241612,74419,109342,216019,15275,212032,21881,52815,12351,12183,21351,71934
h2o2_m_72	Hydrogen peroxide synthesis	23	59	0.389831	0.255417	0	76459,54403,20537,114479,11676,13807,66171,14120,230163,246787,110208,241612,74419,109342,216019,15275,212032,21881,52815,12351,12183,21351,71934
h2o2_m_88	Hydrogen peroxide synthesis	23	59	0.389831	0.255417	0	218756,76459,54403,20537,11676,13807,66171,14120,230163,246787,110208,241612,74419,109342,216019,15275,212032,21881,52815,12351,12183,21351,71934
h2o2_m_94	Hydrogen peroxide synthesis	23	59	0.389831	0.255417	0	76459,54403,20537,114479,11676,13807,66171,14120,230163,246787,110208,241612,74419,109342,216019,15275,212032,21881,52815,12351,12183,21351,71934
xolest_hs_c_36	Cholesteryl esters synthesis	59	161	0.36646	0.271029	0	13121,50799,22273,56421,319554,17252,76459,100705,14137,20544,14194,66194,20775,12715,11636,67863,11676,235293,27402,17855,13807,208715,15357,78830,74754,67680,171210,78920,224530,11428,11409,104112,15490,15488,230163,78801,26458,246787,17448,13595,18194,14081,18642,216019,15275,16987,110196,212032,68603,12709,12351,192156,78070,12183,13360,57279,66445,67895,71934
h2o2_m_102	Hydrogen peroxide synthesis	22	57	0.385965	0.281036	0	218756,76459,20537,11676,13807,66171,14120,230163,246787,110208,241612,74419,109342,216019,15275,212032,21881,52815,12351,12183,21351,71934
h2o2_m_104	Hydrogen peroxide synthesis	22	57	0.385965	0.281036	0	218756,76459,20537,11676,13807,66171,14120,230163,246787,110208,241612,74419,109342,216019,15275,212032,21881,52815,12351,12183,21351,71934
h2o2_m_109	Hydrogen peroxide synthesis	22	57	0.385965	0.281036	0	218756,76459,20537,11676,13807,66171,14120,230163,246787,110208,241612,74419,109342,216019,15275,212032,21881,52815,12351,12183,21351,71934
h2o2_m_17	Hydrogen peroxide synthesis	22	57	0.385965	0.281036	0	218756,76459,20537,11676,13807,66171,14120,230163,246787,110208,241612,74419,109342,216019,15275,212032,21881,52815,12351,12183,21351,71934
h2o2_m_22	Hydrogen peroxide synthesis	22	57	0.385965	0.281036	0	218756,76459,20537,11676,13807,66171,14120,230163,246787,110208,241612,74419,109342,216019,15275,212032,21881,52815,12351,12183,21351,71934
h2o2_m_91	Hydrogen peroxide synthesis	22	57	0.385965	0.281036	0	218756,76459,20537,11676,13807,66171,14120,230163,246787,110208,241612,74419,109342,216019,15275,212032,21881,52815,12351,12183,21351,71934
h2o2_m_1	Hydrogen peroxide synthesis	24	63	0.380952	0.294941	0	218756,76459,20544,20537,114479,11676,13807,66171,14120,230163,246787,110208,241612,74419,109342,216019,15275,212032,21881,52815,12351,12183,21351,71934
tag_hs_c_64	Triacylglycerol synthesis	43	117	0.367521	0.304638	0	50799,22273,68262,218756,67800,17768,56421,100705,54403,14194,12715,11636,67863,11676,27402,13807,14571,78830,67680,78920,14732,104112,230163,78801,246787,50784,17448,241612,14081,18642,109342,216019,15275,28169,212032,12709,67512,12183,16956,66445,67895,269951,13350
h2o2_m_100	Hydrogen peroxide synthesis	21	55	0.381818	0.308735	0	218756,76459,54403,20537,11676,13807,66171,14120,230163,246787,110208,74419,216019,15275,212032,21881,52815,12351,12183,21351,71934
h2o2_m_37	Hydrogen peroxide synthesis	21	55	0.381818	0.308735	0	218756,76459,20537,114479,11676,13807,66171,14120,230163,246787,110208,74419,216019,15275,212032,21881,52815,12351,12183,21351,71934
h2o2_m_42	Hydrogen peroxide synthesis	21	55	0.381818	0.308735	0	218756,76459,54403,20537,11676,13807,66171,14120,230163,246787,110208,74419,216019,15275,212032,21881,52815,12351,12183,21351,71934
h2o2_m_61	Hydrogen peroxide synthesis	21	55	0.381818	0.308735	0	218756,76459,54403,20537,11676,13807,66171,14120,230163,246787,110208,74419,216019,15275,212032,21881,52815,12351,12183,21351,71934
h2o2_m_80	Hydrogen peroxide synthesis	21	55	0.381818	0.308735	0	218756,76459,54403,20537,11676,13807,66171,14120,230163,246787,110208,74419,216019,15275,212032,21881,52815,12351,12183,21351,71934
h2o2_m_90	Hydrogen peroxide synthesis	21	55	0.381818	0.308735	0	218756,76459,54403,20537,11676,13807,66171,14120,230163,246787,110208,74419,216019,15275,212032,21881,52815,12351,12183,21351,71934
pa_hs_c_61	Phosphatidic acid synthesis	45	123	0.365854	0.312291	0	50799,22273,68262,218756,17768,56421,76459,100705,54403,14194,20537,12715,11636,67863,11676,27402,13807,14571,78830,67680,78920,14732,20505,104112,230163,78801,246787,17448,241612,14081,18642,109342,216019,15275,20531,28169,212032,12709,12351,67512,12183,66445,67895,269951,71934
h2o2_m_103	Hydrogen peroxide synthesis	22	58	0.37931	0.315712	0	218756,76459,54403,11676,13807,66171,14120,230163,246787,110208,241612,74419,109342,216019,15275,212032,21881,52815,12351,12183,21351,71934
h2o2_m_11	Hydrogen peroxide synthesis	22	58	0.37931	0.315712	0	76459,54403,20537,11676,13807,66171,14120,230163,246787,110208,241612,74419,109342,216019,15275,212032,21881,52815,12351,12183,21351,71934
h2o2_m_114	Hydrogen peroxide synthesis	22	58	0.37931	0.315712	0	76459,54403,20537,11676,13807,66171,14120,230163,246787,110208,241612,74419,109342,216019,15275,212032,21881,52815,12351,12183,21351,71934
h2o2_m_115	Hydrogen peroxide synthesis	22	58	0.37931	0.315712	0	76459,54403,20537,11676,13807,66171,14120,230163,246787,110208,241612,74419,109342,216019,15275,212032,21881,52815,12351,12183,21351,71934
h2o2_m_118	Hydrogen peroxide synthesis	22	58	0.37931	0.315712	0	218756,76459,54403,11676,13807,66171,14120,230163,246787,110208,241612,74419,109342,216019,15275,212032,21881,52815,12351,12183,21351,71934
h2o2_m_12	Hydrogen peroxide synthesis	22	58	0.37931	0.315712	0	76459,54403,20537,11676,13807,66171,14120,230163,246787,110208,241612,74419,109342,216019,15275,212032,21881,52815,12351,12183,21351,71934
h2o2_m_120	Hydrogen peroxide synthesis	22	58	0.37931	0.315712	0	218756,76459,54403,11676,13807,66171,14120,230163,246787,110208,241612,74419,109342,216019,15275,212032,21881,52815,12351,12183,21351,71934
h2o2_m_27	Hydrogen peroxide synthesis	22	58	0.37931	0.315712	0	218756,76459,54403,11676,13807,66171,14120,230163,246787,110208,241612,74419,109342,216019,15275,212032,21881,52815,12351,12183,21351,71934
h2o2_m_30	Hydrogen peroxide synthesis	22	58	0.37931	0.315712	0	76459,54403,20537,11676,13807,66171,14120,230163,246787,110208,241612,74419,109342,216019,15275,212032,21881,52815,12351,12183,21351,71934
h2o2_m_38	Hydrogen peroxide synthesis	22	58	0.37931	0.315712	0	76459,54403,20537,11676,13807,66171,14120,230163,246787,110208,241612,74419,109342,216019,15275,212032,21881,52815,12351,12183,21351,71934
h2o2_m_45	Hydrogen peroxide synthesis	22	58	0.37931	0.315712	0	76459,54403,20537,11676,13807,66171,14120,230163,246787,110208,241612,74419,109342,216019,15275,212032,21881,52815,12351,12183,21351,71934
h2o2_m_55	Hydrogen peroxide synthesis	22	58	0.37931	0.315712	0	218756,76459,54403,11676,13807,66171,14120,230163,246787,110208,241612,74419,109342,216019,15275,212032,21881,52815,12351,12183,21351,71934
h2o2_m_6	Hydrogen peroxide synthesis	22	58	0.37931	0.315712	0	76459,54403,20537,11676,13807,66171,14120,230163,246787,110208,241612,74419,109342,216019,15275,212032,21881,52815,12351,12183,21351,71934
h2o2_m_7	Hydrogen peroxide synthesis	22	58	0.37931	0.315712	0	76459,54403,20537,11676,13807,66171,14120,230163,246787,110208,241612,74419,109342,216019,15275,212032,21881,52815,12351,12183,21351,71934
h2o2_m_79	Hydrogen peroxide synthesis	22	58	0.37931	0.315712	0	76459,54403,20537,11676,13807,66171,14120,230163,246787,110208,241612,74419,109342,216019,15275,212032,21881,52815,12351,12183,21351,71934
h2o2_m_8	Hydrogen peroxide synthesis	22	58	0.37931	0.315712	0	76459,54403,20537,11676,13807,66171,14120,230163,246787,110208,241612,74419,109342,216019,15275,212032,21881,52815,12351,12183,21351,71934
h2o2_m_82	Hydrogen peroxide synthesis	22	58	0.37931	0.315712	0	76459,54403,20537,11676,13807,66171,14120,230163,246787,110208,241612,74419,109342,216019,15275,212032,21881,52815,12351,12183,21351,71934
h2o2_m_83	Hydrogen peroxide synthesis	22	58	0.37931	0.315712	0	76459,54403,20537,11676,13807,66171,14120,230163,246787,110208,241612,74419,109342,216019,15275,212032,21881,52815,12351,12183,21351,71934
h2o2_m_85	Hydrogen peroxide synthesis	22	58	0.37931	0.315712	0	218756,76459,54403,11676,13807,66171,14120,230163,246787,110208,241612,74419,109342,216019,15275,212032,21881,52815,12351,12183,21351,71934
h2o2_m_97	Hydrogen peroxide synthesis	22	58	0.37931	0.315712	0	76459,54403,20537,11676,13807,66171,14120,230163,246787,110208,241612,74419,109342,216019,15275,212032,21881,52815,12351,12183,21351,71934
h2o2_m_39	Hydrogen peroxide synthesis	24	64	0.375	0.328539	0	76459,54403,20544,20537,114479,11676,13807,66171,14120,230163,246787,110208,241612,74419,109342,216019,15275,212032,21881,52815,12351,12183,21351,71934
h2o2_m_56	Hydrogen peroxide synthesis	24	64	0.375	0.328539	0	76459,54403,20544,20537,114479,11676,13807,66171,14120,230163,246787,110208,241612,74419,109342,216019,15275,212032,21881,52815,12351,12183,21351,71934
tag_hs_c_217	Triacylglycerol synthesis	43	118	0.364407	0.329823	0	50799,22273,68262,218756,67800,17768,56421,100705,54403,14194,12715,11636,67863,11676,27402,13807,14571,78830,67680,78920,14732,104112,230163,78801,246787,50784,17448,241612,14081,18642,109342,216019,15275,28169,212032,12709,67512,12183,16956,66445,67895,269951,13350
h2o2_m_116	Hydrogen peroxide synthesis	20	53	0.377358	0.338587	0	218756,76459,20537,11676,13807,66171,14120,230163,246787,110208,74419,216019,15275,212032,21881,52815,12351,12183,21351,71934
h2o2_m_16	Hydrogen peroxide synthesis	20	53	0.377358	0.338587	0	218756,76459,20537,11676,13807,66171,14120,230163,246787,110208,74419,216019,15275,212032,21881,52815,12351,12183,21351,71934
h2o2_m_78	Hydrogen peroxide synthesis	20	53	0.377358	0.338587	0	218756,76459,20537,11676,13807,66171,14120,230163,246787,110208,74419,216019,15275,212032,21881,52815,12351,12183,21351,71934
h2o2_m_101	Hydrogen peroxide synthesis	21	56	0.375	0.345271	0	56421,76459,54403,20537,11676,13807,66171,14120,230163,110208,74419,18642,216019,15275,212032,21881,52815,12351,12183,21351,71934
h2o2_m_44	Hydrogen peroxide synthesis	21	56	0.375	0.345271	0	56421,76459,54403,20537,11676,13807,66171,14120,230163,110208,74419,18642,216019,15275,212032,21881,52815,12351,12183,21351,71934
h2o2_m_57	Hydrogen peroxide synthesis	21	56	0.375	0.345271	0	76459,54403,20537,114479,11676,13807,66171,14120,230163,246787,110208,74419,216019,15275,212032,21881,52815,12351,12183,21351,71934
h2o2_m_59	Hydrogen peroxide synthesis	21	56	0.375	0.345271	0	76459,54403,20537,114479,11676,13807,66171,14120,230163,246787,110208,74419,216019,15275,212032,21881,52815,12351,12183,21351,71934
h2o2_m_89	Hydrogen peroxide synthesis	21	56	0.375	0.345271	0	56421,76459,54403,20537,11676,13807,66171,14120,230163,110208,74419,18642,216019,15275,212032,21881,52815,12351,12183,21351,71934
tag_hs_c_230	Triacylglycerol synthesis	43	119	0.361345	0.355631	0	50799,22273,68262,67800,17768,56421,15929,100705,54403,14194,20537,12715,11636,67863,11676,27402,13807,14571,78830,67680,78920,14732,104112,230163,78801,246787,50784,17448,241612,14081,18642,109342,216019,15275,28169,212032,12709,67512,12183,16956,66445,67895,13350
h2o2_m_15	Hydrogen peroxide synthesis	23	62	0.370968	0.357502	0	218756,76459,20544,20537,11676,13807,66171,14120,230163,246787,110208,241612,74419,109342,216019,15275,212032,21881,52815,12351,12183,21351,71934
h2o2_m_75	Hydrogen peroxide synthesis	23	62	0.370968	0.357502	0	218756,76459,20544,20537,11676,13807,66171,14120,230163,246787,110208,241612,74419,109342,216019,15275,212032,21881,52815,12351,12183,21351,71934
tag_hs_c_201	Triacylglycerol synthesis	45	125	0.36	0.362522	0	50799,22273,68262,67800,17768,56421,76459,100705,14194,20537,12715,11636,67863,11676,27402,13807,14571,78830,67680,78920,14732,104112,230163,78801,246787,50784,17448,241612,14081,18642,109342,216019,15275,28169,212032,12709,12351,67512,12183,16956,66445,67895,269951,13350,71934
tag_hs_c_203	Triacylglycerol synthesis	45	125	0.36	0.362522	0	50799,22273,68262,67800,17768,56421,76459,100705,14194,20537,12715,114479,11636,67863,11676,27402,13807,14571,78830,67680,78920,14732,11428,104112,230163,78801,246787,50784,17448,241612,14081,18642,109342,216019,15275,28169,212032,12709,12351,67512,12183,66445,67895,13350,71934
tag_hs_c_40	Triacylglycerol synthesis	45	125	0.36	0.362522	0	50799,22273,68262,218756,67800,17768,56421,76459,100705,54403,14194,12715,11636,67863,11676,27402,13807,14571,78830,67680,78920,14732,104112,230163,78801,246787,50784,17448,241612,14081,18642,109342,216019,15275,28169,212032,12709,12351,67512,12183,66445,67895,269951,13350,71934
tag_hs_c_82	Triacylglycerol synthesis	45	125	0.36	0.362522	0	50799,22273,68262,67800,17768,56421,76459,100705,14194,20537,12715,114479,11636,67863,11676,27402,13807,14571,78830,67680,78920,14732,11428,104112,230163,78801,246787,50784,17448,241612,14081,18642,109342,216019,15275,28169,212032,12709,12351,67512,12183,66445,67895,13350,71934
pail_hs_c_197	Phosphatidylinositol synthesis	46	128	0.359375	0.365839	0	50799,22273,68262,17768,56421,110446,100705,54403,78894,67041,14194,20537,12715,11636,67863,11676,27402,13807,14571,78830,67680,78920,14732,224530,20505,230163,78801,246787,114663,20515,17448,241612,14081,18642,109342,216019,15275,20531,28169,212032,12709,67512,12183,66445,67895,269951
tag_hs_c_44	Triacylglycerol synthesis	46	128	0.359375	0.365839	0	50799,22273,68262,67800,17768,56421,76459,100705,14194,20537,12715,114479,11636,67863,11676,27402,13807,14571,78830,67680,78920,14732,104112,230163,78801,246787,50784,17448,241612,14081,18642,109342,216019,15275,28169,212032,12709,12351,67512,12183,16956,66445,67895,269951,13350,71934
tag_hs_c_48	Triacylglycerol synthesis	46	128	0.359375	0.365839	0	50799,22273,68262,67800,17768,56421,15929,76459,100705,54403,14194,20537,12715,114479,11636,67863,11676,27402,13807,14571,78830,67680,78920,14732,104112,230163,78801,246787,50784,17448,241612,14081,18642,109342,216019,15275,28169,212032,12709,12351,67512,12183,66445,67895,13350,71934
tag_hs_c_91	Triacylglycerol synthesis	46	128	0.359375	0.365839	0	50799,22273,68262,67800,17768,56421,15929,76459,100705,54403,14194,20537,12715,114479,11636,67863,11676,27402,13807,14571,78830,67680,78920,14732,104112,230163,78801,246787,50784,17448,241612,14081,18642,109342,216019,15275,28169,212032,12709,12351,67512,12183,66445,67895,13350,71934
pa_hs_c_168	Phosphatidic acid synthesis	41	114	0.359649	0.375162	0	50799,22273,68262,218756,17768,56421,100705,14194,20537,12715,114479,11636,67863,11676,27402,13807,14571,78830,67680,78920,14732,104112,230163,78801,246787,319848,17448,241612,14081,18642,109342,216019,15275,28169,212032,12709,67512,12183,66445,67895,269951
pa_hs_c_65	Phosphatidic acid synthesis	41	114	0.359649	0.375162	0	50799,22273,68262,17768,56421,100705,54403,14194,20537,12715,11636,67863,11676,27402,13807,14571,78830,67680,78920,14732,11428,20505,104112,230163,78801,246787,17448,241612,14081,18642,109342,216019,15275,20531,28169,212032,12709,67512,12183,66445,67895
h2o2_m_111	Hydrogen peroxide synthesis	20	54	0.37037	0.376882	0	218756,76459,54403,20537,11676,13807,66171,14120,230163,110208,74419,216019,15275,212032,21881,52815,12351,12183,21351,71934
h2o2_m_113	Hydrogen peroxide synthesis	20	54	0.37037	0.376882	0	218756,76459,54403,20537,11676,13807,66171,14120,230163,110208,74419,216019,15275,212032,21881,52815,12351,12183,21351,71934
h2o2_m_121	Hydrogen peroxide synthesis	20	54	0.37037	0.376882	0	218756,76459,20537,114479,11676,13807,66171,14120,230163,110208,74419,216019,15275,212032,21881,52815,12351,12183,21351,71934
h2o2_m_122	Hydrogen peroxide synthesis	20	54	0.37037	0.376882	0	218756,76459,54403,20537,11676,13807,66171,14120,230163,110208,74419,216019,15275,212032,21881,52815,12351,12183,21351,71934
h2o2_m_123	Hydrogen peroxide synthesis	20	54	0.37037	0.376882	0	218756,76459,54403,20537,11676,13807,66171,14120,230163,110208,74419,216019,15275,212032,21881,52815,12351,12183,21351,71934
h2o2_m_124	Hydrogen peroxide synthesis	20	54	0.37037	0.376882	0	218756,76459,54403,20537,11676,13807,66171,14120,230163,110208,74419,216019,15275,212032,21881,52815,12351,12183,21351,71934
h2o2_m_18	Hydrogen peroxide synthesis	20	54	0.37037	0.376882	0	218756,76459,54403,20537,11676,13807,66171,14120,230163,110208,74419,216019,15275,212032,21881,52815,12351,12183,21351,71934
h2o2_m_2	Hydrogen peroxide synthesis	20	54	0.37037	0.376882	0	218756,76459,20537,114479,11676,13807,66171,14120,230163,110208,74419,216019,15275,212032,21881,52815,12351,12183,21351,71934
h2o2_m_3	Hydrogen peroxide synthesis	20	54	0.37037	0.376882	0	218756,76459,54403,20537,11676,13807,66171,14120,230163,110208,74419,216019,15275,212032,21881,52815,12351,12183,21351,71934
h2o2_m_77	Hydrogen peroxide synthesis	20	54	0.37037	0.376882	0	218756,76459,54403,20537,11676,13807,66171,14120,230163,110208,74419,216019,15275,212032,21881,52815,12351,12183,21351,71934
h2o2_m_95	Hydrogen peroxide synthesis	20	54	0.37037	0.376882	0	218756,76459,54403,20537,11676,13807,66171,14120,230163,110208,74419,216019,15275,212032,21881,52815,12351,12183,21351,71934
h2o2_m_99	Hydrogen peroxide synthesis	20	54	0.37037	0.376882	0	218756,76459,54403,20537,11676,13807,66171,14120,230163,110208,74419,216019,15275,212032,21881,52815,12351,12183,21351,71934
h2o2_m_68	Hydrogen peroxide synthesis	21	57	0.368421	0.382742	0	76459,54403,11676,13807,66171,14120,230163,246787,110208,241612,74419,109342,216019,15275,212032,21881,52815,12351,12183,21351,71934
pa_hs_c_164	Phosphatidic acid synthesis	44	123	0.357724	0.385203	0	50799,22273,68262,17768,56421,76459,100705,54403,14194,20537,12715,11636,67863,11676,27402,13807,14571,78830,67680,78920,14732,11428,20505,104112,230163,78801,246787,17448,241612,14081,18642,109342,216019,15275,20531,28169,212032,12709,12351,67512,12183,66445,67895,71934
pa_hs_c_169	Phosphatidic acid synthesis	44	123	0.357724	0.385203	0	50799,22273,68262,218756,17768,56421,76459,100705,14194,20537,12715,114479,11636,67863,11676,27402,13807,14571,78830,67680,78920,14732,104112,230163,78801,246787,319848,17448,241612,14081,18642,109342,216019,15275,28169,212032,12709,12351,67512,12183,66445,67895,269951,71934
tag_hs_c_200	Triacylglycerol synthesis	44	123	0.357724	0.385203	0	50799,22273,68262,67800,17768,56421,76459,100705,14194,20537,12715,11636,67863,11676,27402,13807,14571,78830,67680,78920,14732,104112,230163,78801,246787,50784,17448,241612,14081,18642,109342,216019,15275,28169,212032,12709,12351,67512,12183,66445,67895,269951,13350,71934
h2o2_m_32	Hydrogen peroxide synthesis	22	60	0.366667	0.38826	0	218756,76459,20544,20537,114479,11676,13807,66171,14120,230163,246787,110208,74419,216019,15275,212032,21881,52815,12351,12183,21351,71934
pa_hs_c_173	Phosphatidic acid synthesis	45	126	0.357143	0.38838	0	50799,22273,68262,218756,17768,56421,76459,100705,14194,20537,12715,11636,67863,11676,27402,13807,14571,78830,67680,78920,14732,11428,20505,104112,230163,78801,246787,20515,17448,241612,14081,18642,109342,216019,15275,20531,28169,212032,12709,12351,67512,12183,66445,67895,71934
tag_hs_c_145	Triacylglycerol synthesis	45	126	0.357143	0.38838	0	50799,22273,68262,218756,67800,17768,56421,76459,100705,14194,20537,12715,11636,67863,11676,27402,13807,14571,78830,67680,78920,14732,11428,104112,230163,78801,246787,50784,17448,241612,14081,18642,109342,216019,15275,28169,212032,12709,12351,67512,12183,66445,67895,13350,71934
tag_hs_c_16	Triacylglycerol synthesis	45	126	0.357143	0.38838	0	50799,22273,68262,67800,17768,56421,76459,100705,54403,14194,20537,12715,11636,67863,11676,27402,13807,14571,78830,67680,78920,14732,11428,104112,230163,78801,246787,50784,17448,241612,14081,18642,109342,216019,15275,28169,212032,12709,12351,67512,12183,66445,67895,13350,71934
tag_hs_c_174	Triacylglycerol synthesis	45	126	0.357143	0.38838	0	50799,22273,68262,67800,17768,56421,15929,76459,100705,14194,20537,12715,11636,67863,11676,27402,13807,14571,78830,67680,78920,14732,104112,230163,78801,246787,50784,17448,241612,14081,18642,109342,216019,15275,28169,212032,12709,12351,67512,12183,16956,66445,67895,13350,71934
tag_hs_c_23	Triacylglycerol synthesis	45	126	0.357143	0.38838	0	50799,22273,68262,67800,17768,56421,76459,100705,14194,20537,12715,11636,67863,11676,27402,13807,14571,78830,67680,78920,14732,11428,104112,230163,78801,246787,50784,17448,241612,14081,18642,109342,216019,15275,28169,212032,12709,12351,67512,12183,16956,66445,67895,13350,71934
tag_hs_c_15	Triacylglycerol synthesis	46	129	0.356589	0.39148	0	50799,22273,68262,67800,17768,56421,76459,100705,54403,14194,20537,12715,114479,11636,67863,11676,27402,13807,14571,78830,67680,78920,14732,104112,230163,78801,246787,50784,17448,241612,14081,18642,109342,216019,15275,28169,212032,12709,12351,67512,12183,66445,67895,269951,13350,71934
h2o2_m_117	Hydrogen peroxide synthesis	23	63	0.365079	0.393475	0	76459,54403,20544,20537,11676,13807,66171,14120,230163,246787,110208,241612,74419,109342,216019,15275,212032,21881,52815,12351,12183,21351,71934
h2o2_m_125	Hydrogen peroxide synthesis	23	63	0.365079	0.393475	0	76459,54403,20544,20537,11676,13807,66171,14120,230163,246787,110208,241612,74419,109342,216019,15275,212032,21881,52815,12351,12183,21351,71934
h2o2_m_126	Hydrogen peroxide synthesis	23	63	0.365079	0.393475	0	218756,76459,54403,20544,11676,13807,66171,14120,230163,246787,110208,241612,74419,109342,216019,15275,212032,21881,52815,12351,12183,21351,71934
h2o2_m_28	Hydrogen peroxide synthesis	23	63	0.365079	0.393475	0	76459,54403,20544,20537,11676,13807,66171,14120,230163,246787,110208,241612,74419,109342,216019,15275,212032,21881,52815,12351,12183,21351,71934
h2o2_m_35	Hydrogen peroxide synthesis	23	63	0.365079	0.393475	0	76459,54403,20544,20537,11676,13807,66171,14120,230163,246787,110208,241612,74419,109342,216019,15275,212032,21881,52815,12351,12183,21351,71934
h2o2_m_36	Hydrogen peroxide synthesis	23	63	0.365079	0.393475	0	218756,76459,54403,20544,11676,13807,66171,14120,230163,246787,110208,241612,74419,109342,216019,15275,212032,21881,52815,12351,12183,21351,71934
h2o2_m_40	Hydrogen peroxide synthesis	23	63	0.365079	0.393475	0	76459,54403,20544,20537,11676,13807,66171,14120,230163,246787,110208,241612,74419,109342,216019,15275,212032,21881,52815,12351,12183,21351,71934
h2o2_m_41	Hydrogen peroxide synthesis	23	63	0.365079	0.393475	0	218756,76459,54403,20544,11676,13807,66171,14120,230163,246787,110208,241612,74419,109342,216019,15275,212032,21881,52815,12351,12183,21351,71934
h2o2_m_62	Hydrogen peroxide synthesis	23	63	0.365079	0.393475	0	76459,54403,20544,20537,11676,13807,66171,14120,230163,246787,110208,241612,74419,109342,216019,15275,212032,21881,52815,12351,12183,21351,71934
tag_hs_c_139	Triacylglycerol synthesis	47	132	0.356061	0.394506	0	50799,22273,68262,67800,17768,56421,17252,76459,100705,54403,14194,20537,12715,114479,11636,67863,11676,27402,13807,14571,78830,67680,78920,14732,104112,230163,78801,246787,50784,17448,241612,14081,18642,109342,216019,15275,28169,212032,12709,12351,67512,12183,66445,67895,269951,13350,71934
tag_hs_c_198	Triacylglycerol synthesis	47	132	0.356061	0.394506	0	50799,22273,68262,218756,67800,17768,56421,17252,76459,100705,14194,20537,12715,114479,11636,67863,11676,27402,13807,14571,78830,67680,78920,14732,11428,104112,230163,78801,246787,50784,17448,241612,14081,18642,109342,216019,15275,28169,212032,12709,12351,67512,12183,66445,67895,13350,71934
pa_hs_c_213	Phosphatidic acid synthesis	41	115	0.356522	0.402385	0	50799,22273,68262,218756,17768,56421,15929,100705,14194,20537,12715,11636,67863,11676,27402,13807,14571,78830,67680,78920,14732,20505,104112,230163,78801,246787,17448,241612,14081,18642,109342,216019,15275,20531,28169,212032,12709,67512,12183,66445,67895
pa_hs_c_241	Phosphatidic acid synthesis	41	115	0.356522	0.402385	0	50799,22273,68262,218756,17768,56421,100705,14194,20537,12715,11636,67863,11676,27402,13807,14571,78830,67680,78920,14732,20505,104112,230163,78801,246787,17448,241612,14081,18642,109342,216019,15275,20531,28169,212032,12709,67512,12183,66445,67895,269951
pa_hs_c_188	Phosphatidic acid synthesis	42	118	0.355932	0.405554	0	50799,22273,68262,17768,56421,100705,54403,14194,20537,12715,11636,67863,11676,27402,13807,14571,78830,67680,78920,14732,20505,104112,230163,78801,246787,20515,17448,241612,14081,18642,109342,216019,15275,20531,28169,212032,12709,67512,12183,66445,67895,269951
pa_hs_c_211	Phosphatidic acid synthesis	42	118	0.355932	0.405554	0	50799,22273,68262,17768,56421,76459,100705,14194,20537,12715,11636,67863,11676,27402,13807,14571,78830,67680,78920,14732,20505,104112,230163,78801,246787,20515,17448,14081,18642,216019,15275,20531,28169,212032,12709,12351,67512,12183,66445,67895,269951,71934
tag_hs_c_251	Triacylglycerol synthesis	42	118	0.355932	0.405554	0	50799,22273,68262,67800,17768,56421,100705,54403,14194,20537,12715,11636,67863,11676,27402,13807,14571,78830,67680,78920,14732,104112,230163,78801,246787,50784,17448,241612,14081,18642,109342,216019,15275,28169,212032,12709,67512,12183,66445,67895,269951,13350
tag_hs_c_32	Triacylglycerol synthesis	42	118	0.355932	0.405554	0	50799,22273,68262,67800,17768,56421,100705,54403,14194,20537,12715,11636,67863,11676,27402,13807,14571,78830,67680,78920,14732,104112,230163,78801,246787,50784,17448,241612,14081,18642,109342,216019,15275,28169,212032,12709,67512,12183,66445,67895,269951,13350
tag_hs_c_88	Triacylglycerol synthesis	42	118	0.355932	0.405554	0	50799,22273,68262,218756,67800,17768,56421,100705,14194,20537,12715,11636,67863,11676,27402,13807,14571,78830,67680,78920,14732,11428,104112,230163,78801,246787,50784,17448,241612,14081,18642,109342,216019,15275,28169,212032,12709,67512,12183,66445,67895,13350
tag_hs_c_25	Triacylglycerol synthesis	43	121	0.355372	0.408641	0	50799,22273,68262,67800,17768,56421,76459,100705,14194,20537,12715,114479,11636,67863,11676,27402,13807,14571,78830,67680,78920,14732,104112,230163,78801,246787,50784,17448,14081,18642,216019,15275,28169,212032,12709,12351,67512,12183,66445,67895,269951,13350,71934
tag_hs_c_253	Triacylglycerol synthesis	43	121	0.355372	0.408641	0	50799,22273,68262,218756,67800,17768,56421,100705,14194,20537,12715,114479,11636,67863,11676,27402,13807,14571,78830,67680,78920,14732,104112,230163,78801,246787,50784,17448,241612,14081,18642,109342,216019,15275,28169,212032,12709,67512,12183,66445,67895,269951,13350
dag_hs_c_127	Diacylglycerol synthesis	44	124	0.354839	0.411648	0	50799,22273,68262,17768,56421,76459,100705,54403,14194,20537,12715,114479,11636,67863,11676,27402,13807,14571,78830,67680,78920,14732,104112,230163,78801,246787,50784,17448,241612,14081,18642,109342,216019,15275,28169,212032,12709,12351,67512,12183,66445,67895,269951,71934
dag_hs_c_49	Diacylglycerol synthesis	44	124	0.354839	0.411648	0	50799,22273,68262,17768,56421,76459,100705,54403,14194,20537,12715,114479,11636,67863,11676,27402,13807,14571,78830,67680,78920,14732,104112,230163,78801,246787,50784,17448,241612,14081,18642,109342,216019,15275,28169,212032,12709,12351,67512,12183,66445,67895,269951,71934
pa_hs_c_187	Phosphatidic acid synthesis	44	124	0.354839	0.411648	0	50799,22273,68262,218756,17768,56421,76459,100705,54403,14194,20537,12715,11636,67863,11676,27402,13807,14571,78830,67680,78920,14732,104112,230163,78801,246787,319848,17448,241612,14081,18642,109342,216019,15275,28169,212032,12709,12351,67512,12183,66445,67895,269951,71934
pa_hs_c_25	Phosphatidic acid synthesis	44	124	0.354839	0.411648	0	50799,22273,68262,218756,17768,56421,76459,100705,14194,20537,12715,11636,67863,11676,27402,13807,14571,78830,67680,78920,14732,20505,104112,230163,78801,246787,17448,241612,14081,18642,109342,216019,15275,20531,28169,212032,12709,12351,67512,12183,66445,67895,269951,71934
pa_hs_c_54	Phosphatidic acid synthesis	44	124	0.354839	0.411648	0	50799,22273,68262,17768,56421,76459,100705,54403,14194,12715,11636,67863,11676,27402,13807,14571,78830,67680,78920,14732,20505,104112,230163,78801,246787,20515,17448,241612,14081,18642,109342,216019,15275,20531,28169,212032,12709,12351,67512,12183,66445,67895,269951,71934
pa_hs_c_81	Phosphatidic acid synthesis	44	124	0.354839	0.411648	0	50799,22273,68262,17768,56421,76459,100705,54403,14194,20537,12715,114479,11636,67863,11676,27402,13807,14571,78830,67680,78920,14732,11428,104112,230163,78801,246787,20515,17448,241612,14081,18642,109342,216019,15275,28169,212032,12709,12351,67512,12183,66445,67895,71934
tag_hs_c_214	Triacylglycerol synthesis	44	124	0.354839	0.411648	0	50799,22273,68262,67800,17768,56421,17252,100705,54403,14194,20537,12715,11636,67863,11676,27402,13807,14571,78830,67680,78920,14732,104112,230163,78801,246787,50784,17448,241612,14081,18642,109342,216019,15275,28169,212032,12709,67512,12183,16956,66445,67895,269951,13350
tag_hs_c_94	Triacylglycerol synthesis	44	124	0.354839	0.411648	0	50799,22273,68262,67800,17768,56421,76459,100705,14194,20537,12715,11636,67863,11676,27402,13807,14571,78830,67680,78920,14732,104112,230163,78801,246787,50784,17448,241612,14081,18642,109342,216019,15275,28169,212032,12709,12351,67512,12183,66445,67895,269951,13350,71934
tag_hs_c_135	Triacylglycerol synthesis	45	127	0.354331	0.414582	0	50799,22273,68262,67800,17768,56421,15929,76459,100705,54403,14194,20537,12715,11636,67863,11676,27402,13807,14571,78830,67680,78920,14732,104112,230163,78801,246787,50784,17448,241612,14081,18642,109342,216019,15275,28169,212032,12709,12351,67512,12183,66445,67895,13350,71934
h2o2_m_107	Hydrogen peroxide synthesis	20	55	0.363636	0.415822	0	76459,54403,20537,114479,11676,13807,66171,14120,230163,110208,74419,216019,15275,212032,21881,52815,12351,12183,21351,71934
h2o2_m_20	Hydrogen peroxide synthesis	20	55	0.363636	0.415822	0	76459,54403,20537,114479,11676,13807,66171,14120,230163,110208,74419,216019,15275,212032,21881,52815,12351,12183,21351,71934
h2o2_m_47	Hydrogen peroxide synthesis	20	55	0.363636	0.415822	0	76459,54403,20537,114479,11676,13807,66171,14120,230163,110208,74419,216019,15275,212032,21881,52815,12351,12183,21351,71934
h2o2_m_76	Hydrogen peroxide synthesis	20	55	0.363636	0.415822	0	76459,54403,20537,114479,11676,13807,66171,14120,230163,110208,74419,216019,15275,212032,21881,52815,12351,12183,21351,71934
h2o2_m_86	Hydrogen peroxide synthesis	20	55	0.363636	0.415822	0	76459,54403,20537,114479,11676,13807,66171,14120,230163,110208,74419,216019,15275,212032,21881,52815,12351,12183,21351,71934
pa_hs_c_37	Phosphatidic acid synthesis	46	130	0.353846	0.417445	0	50799,22273,68262,218756,17768,56421,15929,17252,76459,100705,14194,20537,12715,114479,11636,67863,11676,27402,13807,14571,78830,67680,78920,14732,20505,104112,230163,78801,246787,17448,241612,14081,18642,109342,216019,15275,20531,28169,212032,12709,12351,67512,12183,66445,67895,71934
tag_hs_c_10	Triacylglycerol synthesis	46	130	0.353846	0.417445	0	50799,22273,68262,67800,17768,56421,76459,100705,54403,14194,20537,12715,114479,11636,67863,11676,27402,13807,14571,78830,67680,78920,14732,11428,104112,230163,78801,246787,50784,17448,241612,14081,18642,109342,216019,15275,28169,212032,12709,12351,67512,12183,66445,67895,13350,71934
tag_hs_c_221	Triacylglycerol synthesis	46	130	0.353846	0.417445	0	50799,22273,68262,67800,17768,56421,76459,100705,20544,14194,20537,12715,114479,11636,67863,11676,27402,13807,14571,78830,67680,78920,14732,11428,104112,230163,78801,246787,50784,17448,241612,14081,18642,109342,216019,15275,28169,212032,12709,12351,67512,12183,66445,67895,13350,71934
tag_hs_c_50	Triacylglycerol synthesis	46	130	0.353846	0.417445	0	50799,22273,68262,67800,17768,56421,17252,76459,100705,14194,20537,12715,114479,11636,67863,11676,27402,13807,14571,78830,67680,78920,14732,104112,230163,78801,246787,50784,17448,241612,14081,18642,109342,216019,15275,28169,212032,12709,12351,67512,12183,66445,67895,269951,13350,71934
tag_hs_c_109	Triacylglycerol synthesis	47	133	0.353383	0.420241	0	50799,22273,68262,67800,17768,56421,17252,76459,100705,14194,20537,12715,114479,11636,67863,11676,27402,13807,14571,78830,67680,78920,14732,11428,104112,230163,78801,246787,50784,17448,241612,14081,18642,109342,216019,15275,28169,212032,12709,12351,67512,12183,16956,66445,67895,13350,71934
tag_hs_c_13	Triacylglycerol synthesis	47	133	0.353383	0.420241	0	50799,22273,68262,218756,67800,17768,56421,15929,17252,76459,100705,14194,20537,12715,114479,11636,67863,11676,27402,13807,14571,78830,67680,78920,14732,104112,230163,78801,246787,50784,17448,241612,14081,18642,109342,216019,15275,28169,212032,12709,12351,67512,12183,66445,67895,13350,71934
tag_hs_c_130	Triacylglycerol synthesis	47	133	0.353383	0.420241	0	50799,22273,68262,67800,17768,56421,17252,76459,100705,14194,20537,12715,11636,67863,11676,27402,13807,14571,78830,67680,78920,14732,104112,230163,107605,78801,246787,50784,17448,241612,14081,18642,109342,216019,15275,28169,212032,12709,12351,67512,12183,16956,66445,67895,269951,13350,71934
tag_hs_c_138	Triacylglycerol synthesis	47	133	0.353383	0.420241	0	50799,22273,68262,67800,17768,56421,17252,76459,100705,54403,14194,20537,12715,114479,11636,67863,11676,27402,13807,14571,78830,67680,78920,14732,11428,104112,230163,78801,246787,50784,17448,241612,14081,18642,109342,216019,15275,28169,212032,12709,12351,67512,12183,66445,67895,13350,71934
tag_hs_c_180	Triacylglycerol synthesis	47	133	0.353383	0.420241	0	50799,22273,68262,67800,17768,56421,17252,76459,100705,54403,14194,20537,12715,114479,11636,67863,11676,27402,13807,14571,78830,67680,78920,14732,104112,230163,78801,246787,50784,17448,241612,14081,18642,109342,216019,15275,28169,212032,12709,12351,67512,12183,66445,67895,269951,13350,71934
tag_hs_c_238	Triacylglycerol synthesis	47	133	0.353383	0.420241	0	50799,22273,68262,67800,17768,56421,17252,76459,100705,14194,20537,12715,11636,67863,11676,27402,13807,14571,78830,67680,78920,14732,104112,230163,107605,78801,246787,50784,17448,241612,14081,18642,109342,216019,15275,28169,212032,12709,12351,67512,12183,16956,66445,67895,269951,13350,71934
h2o2_m_60	Hydrogen peroxide synthesis	21	58	0.362069	0.420786	0	218756,76459,20544,20537,11676,13807,66171,14120,230163,246787,110208,74419,216019,15275,212032,21881,52815,12351,12183,21351,71934
h2o2_m_112	Hydrogen peroxide synthesis	22	61	0.360656	0.425469	0	76459,54403,20544,20537,114479,11676,13807,66171,14120,230163,246787,110208,74419,216019,15275,212032,21881,52815,12351,12183,21351,71934
h2o2_m_4	Hydrogen peroxide synthesis	22	61	0.360656	0.425469	0	76459,54403,20544,20537,114479,11676,13807,66171,14120,230163,246787,110208,74419,216019,15275,212032,21881,52815,12351,12183,21351,71934
h2o2_m_48	Hydrogen peroxide synthesis	22	61	0.360656	0.425469	0	76459,54403,20544,20537,114479,11676,13807,66171,14120,230163,246787,110208,74419,216019,15275,212032,21881,52815,12351,12183,21351,71934
h2o2_m_58	Hydrogen peroxide synthesis	22	61	0.360656	0.425469	0	56421,76459,54403,20544,20537,11676,13807,66171,14120,230163,110208,74419,18642,216019,15275,212032,21881,52815,12351,12183,21351,71934
h2o2_m_70	Hydrogen peroxide synthesis	22	61	0.360656	0.425469	0	56421,76459,54403,20544,20537,11676,13807,66171,14120,230163,110208,74419,18642,216019,15275,212032,21881,52815,12351,12183,21351,71934
tag_hs_c_222	Triacylglycerol synthesis	40	113	0.353982	0.426941	0	50799,22273,68262,67800,17768,56421,100705,54403,14194,20537,12715,11636,67863,11676,27402,13807,14571,78830,67680,78920,14732,104112,230163,78801,246787,50784,17448,14081,18642,216019,15275,28169,212032,12709,67512,12183,66445,67895,269951,13350
tag_hs_c_38	Triacylglycerol synthesis	40	113	0.353982	0.426941	0	50799,22273,68262,67800,17768,56421,100705,54403,14194,20537,12715,11636,67863,11676,27402,13807,14571,78830,67680,78920,14732,11428,104112,230163,78801,246787,50784,17448,14081,18642,216019,15275,28169,212032,12709,67512,12183,66445,67895,13350
pa_hs_c_208	Phosphatidic acid synthesis	41	116	0.353448	0.429902	0	50799,22273,68262,17768,56421,100705,54403,14194,20537,12715,11636,67863,11676,27402,13807,14571,78830,67680,78920,14732,20505,104112,230163,78801,246787,17448,241612,14081,18642,109342,216019,15275,20531,28169,212032,12709,67512,12183,66445,67895,269951
tag_hs_c_215	Triacylglycerol synthesis	42	119	0.352941	0.432785	0	50799,22273,68262,67800,17768,56421,15929,100705,54403,14194,20537,12715,11636,67863,11676,27402,13807,14571,78830,67680,78920,14732,104112,230163,78801,246787,50784,17448,241612,14081,18642,109342,216019,15275,28169,212032,12709,67512,12183,66445,67895,13350
tag_hs_c_79	Triacylglycerol synthesis	42	119	0.352941	0.432785	0	50799,22273,68262,67800,17768,56421,100705,54403,14194,20537,12715,11636,67863,11676,27402,13807,14571,78830,67680,78920,14732,104112,230163,78801,246787,50784,17448,241612,14081,18642,109342,216019,15275,28169,212032,12709,67512,12183,66445,67895,269951,13350
dag_hs_c_106	Diacylglycerol synthesis	43	122	0.352459	0.435594	0	50799,22273,68262,17768,56421,76459,100705,14194,20537,12715,114479,11636,67863,11676,27402,13807,14571,78830,67680,78920,14732,104112,230163,78801,246787,50784,17448,241612,14081,18642,109342,216019,15275,28169,212032,12709,12351,67512,12183,66445,67895,269951,71934
dag_hs_c_130	Diacylglycerol synthesis	43	122	0.352459	0.435594	0	50799,22273,68262,218756,17768,56421,76459,100705,14194,20537,12715,11636,67863,11676,27402,13807,14571,78830,67680,78920,14732,104112,230163,78801,246787,50784,17448,241612,14081,18642,109342,216019,15275,28169,212032,12709,12351,67512,12183,66445,67895,269951,71934
pa_hs_c_124	Phosphatidic acid synthesis	43	122	0.352459	0.435594	0	50799,22273,68262,17768,56421,76459,100705,14194,12715,11636,67863,11676,27402,13807,14571,78830,67680,78920,14732,11428,20505,104112,230163,78801,246787,20515,17448,241612,14081,18642,109342,216019,15275,20531,28169,212032,12709,12351,67512,12183,66445,67895,71934
pa_hs_c_22	Phosphatidic acid synthesis	43	122	0.352459	0.435594	0	50799,22273,68262,218756,17768,56421,76459,100705,54403,14194,12715,11636,67863,11676,27402,13807,14571,78830,67680,78920,14732,104112,230163,78801,246787,20515,17448,241612,14081,18642,109342,216019,15275,28169,212032,12709,12351,67512,12183,66445,67895,269951,71934
tag_hs_c_112	Triacylglycerol synthesis	43	122	0.352459	0.435594	0	50799,22273,68262,67800,17768,56421,76459,100705,14194,20537,12715,114479,11636,67863,11676,27402,13807,14571,78830,67680,78920,14732,11428,104112,230163,78801,50784,17448,14081,18642,216019,15275,28169,212032,12709,12351,67512,12183,16956,66445,67895,13350,71934
tag_hs_c_4	Triacylglycerol synthesis	43	122	0.352459	0.435594	0	50799,22273,68262,67800,17768,56421,15929,100705,54403,14194,20537,12715,11636,67863,11676,27402,13807,14571,78830,67680,78920,14732,104112,230163,78801,246787,50784,17448,241612,14081,18642,109342,216019,15275,28169,212032,12709,67512,12183,16956,66445,67895,13350
tag_hs_c_67	Triacylglycerol synthesis	43	122	0.352459	0.435594	0	50799,22273,68262,67800,17768,56421,100705,54403,20544,14194,20537,12715,11636,67863,11676,27402,13807,14571,78830,67680,78920,14732,104112,230163,78801,246787,50784,17448,241612,14081,18642,109342,216019,15275,28169,212032,12709,67512,12183,66445,67895,269951,13350
dag_hs_c_133	Diacylglycerol synthesis	44	125	0.352	0.438334	0	50799,22273,68262,17768,56421,76459,100705,54403,14194,20537,12715,114479,11636,67863,11676,27402,13807,14571,78830,67680,78920,14732,11428,104112,230163,78801,246787,50784,17448,241612,14081,18642,109342,216019,15275,28169,212032,12709,12351,67512,12183,66445,67895,71934
dag_hs_c_26	Diacylglycerol synthesis	44	125	0.352	0.438334	0	50799,22273,68262,218756,17768,56421,76459,100705,14194,20537,12715,114479,11636,67863,11676,27402,13807,14571,78830,67680,78920,14732,104112,230163,78801,246787,50784,17448,241612,14081,18642,109342,216019,15275,28169,212032,12709,12351,67512,12183,66445,67895,269951,71934
pa_hs_c_134	Phosphatidic acid synthesis	44	125	0.352	0.438334	0	50799,22273,68262,17768,56421,76459,100705,54403,14194,20537,12715,11636,67863,11676,27402,13807,14571,78830,67680,78920,14732,20505,104112,230163,78801,246787,17448,241612,14081,18642,109342,216019,15275,20531,28169,212032,12709,12351,67512,12183,66445,67895,269951,71934
pa_hs_c_226	Phosphatidic acid synthesis	44	125	0.352	0.438334	0	50799,22273,68262,17768,56421,76459,100705,54403,14194,20537,12715,11636,67863,11676,27402,13807,14571,78830,67680,78920,14732,11428,20505,104112,230163,78801,246787,17448,241612,14081,18642,109342,216019,15275,20531,28169,212032,12709,12351,67512,12183,66445,67895,71934
pa_hs_c_46	Phosphatidic acid synthesis	44	125	0.352	0.438334	0	50799,22273,68262,218756,17768,56421,76459,100705,14194,20537,12715,11636,67863,11676,27402,13807,14571,78830,67680,78920,14732,20505,104112,230163,78801,246787,17448,241612,14081,18642,109342,216019,15275,20531,28169,212032,12709,12351,67512,12183,66445,67895,269951,71934
tag_hs_c_5	Triacylglycerol synthesis	44	125	0.352	0.438334	0	50799,22273,68262,67800,17768,56421,15929,17252,100705,54403,14194,20537,12715,11636,67863,11676,27402,13807,14571,78830,67680,78920,14732,104112,230163,78801,246787,50784,17448,241612,14081,18642,109342,216019,15275,28169,212032,12709,67512,12183,16956,66445,67895,13350
tag_hs_c_63	Triacylglycerol synthesis	44	125	0.352	0.438334	0	50799,22273,68262,67800,17768,56421,17252,100705,54403,14194,20537,12715,11636,67863,11676,27402,13807,14571,78830,67680,78920,14732,11428,104112,230163,78801,246787,50784,17448,241612,14081,18642,109342,216019,15275,28169,212032,12709,67512,12183,16956,66445,67895,13350
tag_hs_c_45	Triacylglycerol synthesis	45	128	0.351562	0.441009	0	50799,22273,68262,67800,17768,56421,76459,100705,14194,20537,12715,11636,67863,11676,27402,13807,14571,78830,67680,78920,14732,104112,230163,78801,246787,50784,17448,241612,14081,18642,109342,216019,15275,28169,212032,12709,12351,67512,12183,16956,66445,67895,269951,13350,71934
tag_hs_c_83	Triacylglycerol synthesis	45	128	0.351562	0.441009	0	50799,22273,68262,67800,17768,56421,76459,100705,14194,20537,12715,114479,11636,67863,11676,27402,13807,14571,78830,67680,78920,14732,11428,104112,230163,78801,246787,50784,17448,241612,14081,18642,109342,216019,15275,28169,212032,12709,12351,67512,12183,66445,67895,13350,71934
tag_hs_c_85	Triacylglycerol synthesis	45	128	0.351562	0.441009	0	50799,22273,68262,67800,17768,56421,76459,100705,14194,20537,12715,11636,67863,11676,27402,13807,14571,78830,67680,78920,14732,11428,104112,230163,78801,246787,50784,17448,241612,14081,18642,109342,216019,15275,28169,212032,12709,12351,67512,12183,16956,66445,67895,13350,71934
pa_hs_c_133	Phosphatidic acid synthesis	46	131	0.351145	0.443621	0	50799,22273,68262,17768,56421,17252,76459,100705,54403,14194,20537,12715,11636,67863,11676,27402,13807,14571,78830,67680,78920,14732,20505,104112,230163,78801,246787,20515,17448,241612,14081,18642,109342,216019,15275,20531,28169,212032,12709,12351,67512,12183,66445,67895,269951,71934
tag_hs_c_123	Triacylglycerol synthesis	46	131	0.351145	0.443621	0	50799,22273,68262,67800,17768,56421,15929,76459,100705,54403,14194,20537,12715,114479,11636,67863,11676,27402,13807,14571,78830,67680,78920,14732,104112,230163,78801,246787,50784,17448,241612,14081,18642,109342,216019,15275,28169,212032,12709,12351,67512,12183,66445,67895,13350,71934
tag_hs_c_164	Triacylglycerol synthesis	46	131	0.351145	0.443621	0	50799,22273,68262,67800,17768,56421,17252,76459,100705,14194,20537,12715,11636,67863,11676,27402,13807,14571,78830,67680,78920,14732,11428,104112,230163,78801,246787,50784,17448,241612,14081,18642,109342,216019,15275,28169,212032,12709,12351,67512,12183,16956,66445,67895,13350,71934
tag_hs_c_108	Triacylglycerol synthesis	47	134	0.350746	0.446174	0	50799,22273,68262,218756,67800,17768,56421,17252,76459,100705,54403,14194,12715,11636,67863,11676,27402,13807,14571,78830,67680,78920,14732,104112,230163,107605,78801,246787,50784,17448,241612,14081,18642,109342,216019,15275,28169,212032,12709,12351,67512,12183,66445,67895,269951,13350,71934
h2o2_m_19	Hydrogen peroxide synthesis	19	53	0.358491	0.450754	0	76459,54403,20537,11676,13807,66171,14120,230163,110208,74419,216019,15275,212032,21881,52815,12351,12183,21351,71934
h2o2_m_29	Hydrogen peroxide synthesis	19	53	0.358491	0.450754	0	76459,54403,20537,11676,13807,66171,14120,230163,110208,74419,216019,15275,212032,21881,52815,12351,12183,21351,71934
h2o2_m_92	Hydrogen peroxide synthesis	19	53	0.358491	0.450754	0	76459,54403,20537,11676,13807,66171,14120,230163,110208,74419,216019,15275,212032,21881,52815,12351,12183,21351,71934
pa_hs_c_116	Phosphatidic acid synthesis	39	111	0.351351	0.452209	0	50799,22273,68262,218756,17768,56421,100705,54403,14194,20537,12715,11636,67863,11676,27402,13807,14571,78830,67680,78920,14732,11428,104112,230163,78801,246787,20515,17448,14081,18642,216019,15275,28169,212032,12709,67512,12183,66445,67895
pa_hs_c_130	Phosphatidic acid synthesis	39	111	0.351351	0.452209	0	50799,22273,68262,218756,17768,56421,100705,54403,14194,20537,12715,11636,67863,11676,27402,13807,14571,78830,67680,78920,14732,11428,20505,104112,230163,78801,17448,14081,18642,216019,15275,20531,28169,212032,12709,67512,12183,66445,67895
dag_hs_c_206	Diacylglycerol synthesis	40	114	0.350877	0.454929	0	50799,22273,68262,17768,56421,100705,54403,14194,20537,12715,11636,67863,11676,27402,13807,14571,78830,67680,78920,14732,104112,230163,78801,246787,50784,17448,241612,14081,18642,109342,216019,15275,28169,212032,12709,67512,12183,66445,67895,269951
h2o2_m_21	Hydrogen peroxide synthesis	20	56	0.357143	0.455018	0	69519,76459,54403,20537,11676,13807,66171,14120,230163,110208,74419,216019,15275,212032,21881,52815,12351,12183,21351,71934
dag_hs_c_151	Diacylglycerol synthesis	41	117	0.350427	0.457578	0	50799,22273,68262,218756,17768,56421,100705,14194,20537,12715,114479,11636,67863,11676,27402,13807,14571,78830,67680,78920,14732,104112,230163,78801,246787,50784,17448,241612,14081,18642,109342,216019,15275,28169,212032,12709,67512,12183,66445,67895,269951
dag_hs_c_21	Diacylglycerol synthesis	41	117	0.350427	0.457578	0	50799,22273,68262,17768,56421,100705,54403,14194,20537,12715,114479,11636,67863,11676,27402,13807,14571,78830,67680,78920,14732,104112,230163,78801,246787,50784,17448,241612,14081,18642,109342,216019,15275,28169,212032,12709,67512,12183,66445,67895,269951
pa_hs_c_222	Phosphatidic acid synthesis	41	117	0.350427	0.457578	0	50799,22273,68262,218756,17768,56421,100705,14194,20537,12715,11636,67863,11676,27402,13807,14571,78830,67680,78920,14732,20505,104112,230163,78801,246787,17448,241612,14081,18642,109342,216019,15275,20531,28169,212032,12709,67512,12183,66445,67895,269951
tag_hs_c_185	Triacylglycerol synthesis	41	117	0.350427	0.457578	0	50799,22273,68262,67800,17768,56421,100705,54403,20544,14194,20537,12715,11636,67863,11676,27402,13807,14571,78830,67680,78920,14732,104112,230163,78801,246787,50784,17448,14081,18642,216019,15275,28169,212032,12709,67512,12183,66445,67895,269951,13350
tag_hs_c_206	Triacylglycerol synthesis	41	117	0.350427	0.457578	0	50799,22273,68262,218756,67800,17768,56421,100705,54403,14194,20537,12715,11636,67863,11676,27402,13807,14571,78830,67680,78920,14732,11428,104112,230163,78801,246787,50784,17448,14081,18642,216019,15275,28169,212032,12709,67512,12183,66445,67895,13350
tag_hs_c_76	Triacylglycerol synthesis	41	117	0.350427	0.457578	0	50799,22273,68262,218756,67800,17768,56421,100705,20544,14194,20537,12715,114479,11636,67863,11676,27402,13807,14571,78830,67680,78920,14732,104112,230163,78801,50784,17448,14081,18642,216019,15275,28169,212032,12709,67512,12183,66445,67895,269951,13350
h2o2_m_14	Hydrogen peroxide synthesis	21	59	0.355932	0.459041	0	218756,76459,54403,20544,20537,11676,13807,66171,14120,230163,110208,74419,216019,15275,212032,21881,52815,12351,12183,21351,71934
h2o2_m_26	Hydrogen peroxide synthesis	21	59	0.355932	0.459041	0	218756,76459,20544,20537,114479,11676,13807,66171,14120,230163,110208,74419,216019,15275,212032,21881,52815,12351,12183,21351,71934
h2o2_m_43	Hydrogen peroxide synthesis	21	59	0.355932	0.459041	0	218756,76459,54403,20544,20537,11676,13807,66171,14120,230163,110208,74419,216019,15275,212032,21881,52815,12351,12183,21351,71934
h2o2_m_46	Hydrogen peroxide synthesis	21	59	0.355932	0.459041	0	218756,76459,20544,20537,114479,11676,13807,66171,14120,230163,110208,74419,216019,15275,212032,21881,52815,12351,12183,21351,71934
h2o2_m_51	Hydrogen peroxide synthesis	21	59	0.355932	0.459041	0	218756,76459,54403,20544,11676,13807,66171,14120,230163,246787,110208,74419,216019,15275,212032,21881,52815,12351,12183,21351,71934
h2o2_m_53	Hydrogen peroxide synthesis	21	59	0.355932	0.459041	0	218756,76459,54403,20544,11676,13807,66171,14120,230163,246787,110208,74419,216019,15275,212032,21881,52815,12351,12183,21351,71934
h2o2_m_54	Hydrogen peroxide synthesis	21	59	0.355932	0.459041	0	218756,76459,54403,20544,20537,11676,13807,66171,14120,230163,110208,74419,216019,15275,212032,21881,52815,12351,12183,21351,71934
h2o2_m_69	Hydrogen peroxide synthesis	21	59	0.355932	0.459041	0	76459,54403,20544,20537,11676,13807,66171,14120,230163,246787,110208,74419,216019,15275,212032,21881,52815,12351,12183,21351,71934
h2o2_m_74	Hydrogen peroxide synthesis	21	59	0.355932	0.459041	0	76459,54403,20544,20537,11676,13807,66171,14120,230163,246787,110208,74419,216019,15275,212032,21881,52815,12351,12183,21351,71934
h2o2_m_84	Hydrogen peroxide synthesis	21	59	0.355932	0.459041	0	218756,76459,54403,20544,20537,11676,13807,66171,14120,230163,110208,74419,216019,15275,212032,21881,52815,12351,12183,21351,71934
h2o2_m_87	Hydrogen peroxide synthesis	21	59	0.355932	0.459041	0	76459,54403,20544,20537,11676,13807,66171,14120,230163,246787,110208,74419,216019,15275,212032,21881,52815,12351,12183,21351,71934
h2o2_m_9	Hydrogen peroxide synthesis	21	59	0.355932	0.459041	0	218756,76459,54403,20544,20537,11676,13807,66171,14120,230163,110208,74419,216019,15275,212032,21881,52815,12351,12183,21351,71934
h2o2_m_93	Hydrogen peroxide synthesis	21	59	0.355932	0.459041	0	218756,76459,54403,20544,20537,11676,13807,66171,14120,230163,110208,74419,216019,15275,212032,21881,52815,12351,12183,21351,71934
h2o2_m_96	Hydrogen peroxide synthesis	21	59	0.355932	0.459041	0	218756,76459,54403,20544,20537,11676,13807,66171,14120,230163,110208,74419,216019,15275,212032,21881,52815,12351,12183,21351,71934
h2o2_m_98	Hydrogen peroxide synthesis	21	59	0.355932	0.459041	0	218756,76459,54403,20544,11676,13807,66171,14120,230163,246787,110208,74419,216019,15275,212032,21881,52815,12351,12183,21351,71934
pa_hs_c_1	Phosphatidic acid synthesis	42	120	0.35	0.46016	0	50799,22273,68262,17768,56421,76459,100705,14194,20537,12715,11636,67863,11676,27402,13807,14571,78830,67680,78920,14732,104112,230163,78801,246787,20515,17448,241612,14081,18642,109342,216019,15275,28169,212032,12709,12351,67512,12183,66445,67895,269951,71934
pa_hs_c_111	Phosphatidic acid synthesis	42	120	0.35	0.46016	0	50799,22273,68262,17768,56421,15929,100705,54403,20544,14194,20537,12715,11636,67863,11676,27402,13807,14571,78830,67680,78920,14732,20505,104112,230163,78801,246787,17448,241612,14081,18642,109342,216019,15275,20531,28169,212032,12709,67512,12183,66445,67895
pa_hs_c_59	Phosphatidic acid synthesis	42	120	0.35	0.46016	0	50799,22273,68262,17768,56421,76459,100705,54403,14194,20537,12715,11636,67863,11676,27402,13807,14571,78830,67680,78920,14732,11428,20505,104112,230163,78801,20515,17448,14081,18642,216019,15275,20531,28169,212032,12709,12351,67512,12183,66445,67895,71934
tag_hs_c_255	Triacylglycerol synthesis	42	120	0.35	0.46016	0	50799,22273,68262,67800,17768,56421,15929,100705,54403,14194,20537,12715,11636,67863,11676,27402,13807,14571,78830,67680,78920,14732,104112,230163,78801,246787,50784,17448,241612,14081,18642,109342,216019,15275,28169,212032,12709,67512,12183,66445,67895,13350
tag_hs_c_72	Triacylglycerol synthesis	42	120	0.35	0.46016	0	50799,22273,68262,218756,67800,17768,56421,17252,100705,54403,14194,20537,12715,11636,67863,11676,27402,13807,14571,78830,67680,78920,14732,104112,230163,78801,50784,17448,14081,18642,216019,15275,28169,212032,12709,67512,12183,16956,66445,67895,269951,13350
dag_hs_c_15	Diacylglycerol synthesis	43	123	0.349593	0.462679	0	50799,22273,68262,218756,17768,56421,76459,100705,54403,14194,12715,11636,67863,11676,27402,13807,14571,78830,67680,78920,14732,104112,230163,78801,246787,50784,17448,241612,14081,18642,109342,216019,15275,28169,212032,12709,12351,67512,12183,66445,67895,269951,71934
pa_hs_c_174	Phosphatidic acid synthesis	43	123	0.349593	0.462679	0	50799,22273,68262,218756,17768,56421,76459,100705,14194,20537,12715,11636,67863,11676,27402,13807,14571,78830,67680,78920,14732,11428,104112,230163,78801,246787,319848,17448,241612,14081,18642,109342,216019,15275,28169,212032,12709,12351,67512,12183,66445,67895,71934
pa_hs_c_184	Phosphatidic acid synthesis	43	123	0.349593	0.462679	0	50799,22273,68262,17768,56421,15929,17252,100705,54403,14194,20537,12715,11636,67863,11676,27402,13807,14571,78830,67680,78920,14732,20505,104112,230163,78801,246787,20515,17448,241612,14081,18642,109342,216019,15275,20531,28169,212032,12709,67512,12183,66445,67895
h2o2_m_66	Hydrogen peroxide synthesis	22	62	0.354839	0.46285	0	76459,54403,20544,11676,13807,66171,14120,230163,246787,110208,241612,74419,109342,216019,15275,212032,21881,52815,12351,12183,21351,71934
h2o2_m_81	Hydrogen peroxide synthesis	22	62	0.354839	0.46285	0	76459,54403,20544,11676,13807,66171,14120,230163,246787,110208,241612,74419,109342,216019,15275,212032,21881,52815,12351,12183,21351,71934
dag_hs_c_108	Diacylglycerol synthesis	44	126	0.349206	0.465139	0	50799,22273,68262,17768,56421,15929,76459,100705,54403,14194,20537,12715,114479,11636,67863,11676,27402,13807,14571,78830,67680,78920,14732,104112,230163,78801,246787,50784,17448,241612,14081,18642,109342,216019,15275,28169,212032,12709,12351,67512,12183,66445,67895,71934
pa_hs_c_110	Phosphatidic acid synthesis	44	126	0.349206	0.465139	0	50799,22273,68262,17768,56421,17252,76459,100705,14194,20537,12715,11636,67863,11676,27402,13807,14571,78830,67680,78920,14732,20505,104112,230163,78801,246787,17448,241612,14081,18642,109342,216019,15275,20531,28169,212032,12709,12351,67512,12183,66445,67895,269951,71934
pa_hs_c_120	Phosphatidic acid synthesis	44	126	0.349206	0.465139	0	50799,22273,68262,17768,56421,76459,100705,54403,14194,12715,11636,67863,11676,27402,13807,14571,78830,67680,78920,14732,20505,104112,230163,78801,246787,20515,17448,241612,14081,18642,109342,216019,15275,20531,28169,212032,12709,12351,67512,12183,66445,67895,269951,71934
pa_hs_c_219	Phosphatidic acid synthesis	44	126	0.349206	0.465139	0	50799,22273,68262,17768,56421,76459,100705,54403,14194,20537,12715,11636,67863,11676,27402,13807,14571,78830,67680,78920,14732,11428,20505,104112,230163,78801,246787,17448,241612,14081,18642,109342,216019,15275,20531,28169,212032,12709,12351,67512,12183,66445,67895,71934
pa_hs_c_41	Phosphatidic acid synthesis	44	126	0.349206	0.465139	0	50799,22273,68262,17768,56421,76459,100705,54403,14194,20537,12715,114479,11636,67863,11676,27402,13807,14571,78830,67680,78920,14732,104112,230163,78801,246787,20515,17448,241612,14081,18642,109342,216019,15275,28169,212032,12709,12351,67512,12183,66445,67895,269951,71934
pa_hs_c_5	Phosphatidic acid synthesis	44	126	0.349206	0.465139	0	50799,22273,68262,17768,56421,15929,76459,100705,54403,14194,20537,12715,11636,67863,11676,27402,13807,14571,78830,67680,78920,14732,20505,104112,230163,78801,246787,17448,241612,14081,18642,109342,216019,15275,20531,28169,212032,12709,12351,67512,12183,66445,67895,71934
tag_hs_c_102	Triacylglycerol synthesis	44	126	0.349206	0.465139	0	50799,22273,68262,218756,67800,56421,76459,100705,14194,20537,12715,114479,11636,67863,11676,27402,13807,78830,67680,78920,14732,104112,230163,78801,246787,50784,17448,241612,14081,18642,109342,216019,15275,28169,212032,12709,12351,67512,12183,66445,67895,269951,13350,71934
tag_hs_c_254	Triacylglycerol synthesis	44	126	0.349206	0.465139	0	50799,22273,68262,67800,17768,56421,76459,100705,14194,20537,12715,11636,67863,11676,27402,13807,14571,78830,67680,78920,14732,104112,230163,78801,246787,50784,17448,241612,14081,18642,109342,216019,15275,28169,212032,12709,12351,67512,12183,66445,67895,269951,13350,71934
tag_hs_c_256	Triacylglycerol synthesis	44	126	0.349206	0.465139	0	50799,22273,68262,67800,17768,56421,76459,100705,14194,20537,12715,11636,67863,11676,27402,13807,14571,78830,67680,78920,14732,104112,230163,78801,246787,50784,17448,241612,14081,18642,109342,216019,15275,28169,212032,12709,12351,67512,12183,66445,67895,269951,13350,71934
tag_hs_c_53	Triacylglycerol synthesis	44	126	0.349206	0.465139	0	50799,22273,68262,67800,17768,56421,15929,76459,100705,14194,20537,12715,11636,67863,11676,27402,13807,14571,78830,67680,78920,14732,104112,230163,78801,246787,50784,17448,241612,14081,18642,109342,216019,15275,28169,212032,12709,12351,67512,12183,66445,67895,13350,71934
tag_hs_c_7	Triacylglycerol synthesis	44	126	0.349206	0.465139	0	50799,22273,68262,218756,67800,17768,56421,76459,100705,14194,12715,11636,67863,11676,27402,13807,14571,78830,67680,78920,14732,104112,230163,78801,246787,50784,17448,241612,14081,18642,109342,216019,15275,28169,212032,12709,12351,67512,12183,66445,67895,269951,13350,71934
tag_hs_c_77	Triacylglycerol synthesis	44	126	0.349206	0.465139	0	50799,22273,68262,67800,17768,56421,76459,100705,14194,20537,12715,11636,67863,11676,27402,13807,14571,78830,67680,78920,14732,104112,230163,78801,246787,50784,17448,241612,14081,18642,109342,216019,15275,28169,212032,12709,12351,67512,12183,66445,67895,269951,13350,71934
pa_hs_c_48	Phosphatidic acid synthesis	45	129	0.348837	0.467542	0	50799,22273,68262,17768,56421,17252,76459,100705,54403,14194,12715,11636,67863,11676,27402,13807,14571,78830,67680,78920,14732,20505,104112,230163,78801,246787,20515,17448,241612,14081,18642,109342,216019,15275,20531,28169,212032,12709,12351,67512,12183,66445,67895,269951,71934
tag_hs_c_249	Triacylglycerol synthesis	45	129	0.348837	0.467542	0	50799,22273,68262,67800,17768,56421,76459,100705,54403,14194,20537,12715,11636,67863,11676,27402,13807,14571,78830,67680,78920,14732,104112,230163,78801,246787,50784,17448,241612,14081,18642,109342,216019,15275,28169,212032,12709,12351,67512,12183,66445,67895,269951,13350,71934
tag_hs_c_51	Triacylglycerol synthesis	45	129	0.348837	0.467542	0	50799,22273,68262,67800,17768,56421,76459,100705,54403,14194,20537,12715,11636,67863,11676,27402,13807,14571,78830,67680,78920,14732,11428,104112,230163,78801,246787,50784,17448,241612,14081,18642,109342,216019,15275,28169,212032,12709,12351,67512,12183,66445,67895,13350,71934
tag_hs_c_86	Triacylglycerol synthesis	45	129	0.348837	0.467542	0	50799,22273,68262,67800,17768,56421,15929,76459,100705,54403,14194,20537,12715,11636,67863,11676,27402,13807,14571,78830,67680,78920,14732,104112,230163,78801,246787,50784,17448,241612,14081,18642,109342,216019,15275,28169,212032,12709,12351,67512,12183,66445,67895,13350,71934
pail_hs_c_213	Phosphatidylinositol synthesis	46	132	0.348485	0.469892	0	50799,22273,68262,17768,56421,110446,100705,54403,78894,67041,20544,14194,12715,11636,67863,11676,27402,13807,14571,78830,67680,78920,14732,224530,20505,230163,78801,246787,114663,20515,17448,241612,14081,18642,109342,216019,15275,20531,28169,212032,12709,67512,12183,66445,67895,269951
tag_hs_c_111	Triacylglycerol synthesis	46	132	0.348485	0.469892	0	50799,22273,68262,67800,17768,56421,17252,76459,100705,14194,20537,12715,114479,11636,67863,11676,27402,13807,14571,78830,67680,78920,14732,11428,104112,230163,78801,246787,50784,17448,241612,14081,18642,109342,216019,15275,28169,212032,12709,12351,67512,12183,66445,67895,13350,71934
tag_hs_c_161	Triacylglycerol synthesis	46	132	0.348485	0.469892	0	50799,22273,68262,67800,17768,56421,17252,76459,100705,14194,20537,12715,11636,67863,11676,27402,13807,14571,78830,67680,78920,14732,104112,230163,107605,78801,246787,50784,17448,241612,14081,18642,109342,216019,15275,28169,212032,12709,12351,67512,12183,66445,67895,269951,13350,71934
tag_hs_c_233	Triacylglycerol synthesis	46	132	0.348485	0.469892	0	50799,22273,68262,67800,17768,56421,17252,76459,100705,54403,14194,20537,12715,11636,67863,11676,27402,13807,14571,78830,67680,78920,14732,104112,230163,78801,246787,50784,17448,241612,14081,18642,109342,216019,15275,28169,212032,12709,12351,67512,12183,66445,67895,269951,13350,71934
tag_hs_c_244	Triacylglycerol synthesis	46	132	0.348485	0.469892	0	50799,22273,68262,67800,17768,56421,17252,76459,100705,54403,14194,20537,12715,11636,67863,11676,27402,13807,14571,78830,67680,78920,14732,104112,230163,78801,246787,50784,17448,241612,14081,18642,109342,216019,15275,28169,212032,12709,12351,67512,12183,66445,67895,269951,13350,71934
tag_hs_c_131	Triacylglycerol synthesis	47	135	0.348148	0.472191	0	50799,22273,68262,67800,17768,56421,15929,17252,76459,100705,14194,20537,12715,114479,11636,67863,11676,27402,13807,14571,78830,67680,78920,14732,104112,230163,107605,78801,246787,50784,17448,241612,14081,18642,109342,216019,15275,28169,212032,12709,12351,67512,12183,66445,67895,13350,71934
tag_hs_c_208	Triacylglycerol synthesis	47	135	0.348148	0.472191	0	50799,22273,68262,67800,17768,56421,17252,76459,100705,14194,20537,12715,114479,11636,67863,11676,27402,13807,14571,78830,67680,78920,14732,104112,230163,78801,246787,50784,17448,241612,14081,18642,109342,216019,15275,28169,212032,12709,12351,67512,12183,16956,66445,67895,269951,13350,71934
tag_hs_c_8	Triacylglycerol synthesis	47	135	0.348148	0.472191	0	50799,22273,68262,67800,17768,56421,17252,76459,100705,14194,20537,12715,114479,11636,67863,11676,27402,13807,14571,78830,67680,78920,14732,11428,104112,230163,78801,246787,50784,17448,241612,14081,18642,109342,216019,15275,28169,212032,12709,12351,67512,12183,16956,66445,67895,13350,71934
pa_hs_c_154	Phosphatidic acid synthesis	39	112	0.348214	0.480567	0	50799,22273,68262,218756,17768,56421,100705,54403,14194,20537,12715,11636,67863,11676,27402,13807,14571,78830,67680,78920,14732,11428,104112,230163,78801,246787,319848,17448,14081,18642,216019,15275,28169,212032,12709,67512,12183,66445,67895
dag_hs_c_81	Diacylglycerol synthesis	40	115	0.347826	0.482952	0	50799,22273,68262,17768,56421,100705,14194,20537,12715,11636,67863,11676,27402,13807,20518,14571,78830,67680,78920,14732,11428,104112,230163,78801,246787,50784,17448,14081,18642,216019,15275,28169,212032,12709,67512,12183,24059,108116,66445,67895
pa_hs_c_114	Phosphatidic acid synthesis	40	115	0.347826	0.482952	0	50799,22273,68262,17768,56421,100705,54403,14194,20537,12715,11636,67863,11676,27402,13807,14571,78830,67680,78920,14732,20505,104112,230163,78801,246787,20515,17448,14081,18642,216019,15275,20531,28169,212032,12709,67512,12183,66445,67895,269951
pa_hs_c_115	Phosphatidic acid synthesis	41	118	0.347458	0.485279	0	50799,22273,68262,17768,56421,100705,54403,14194,20537,12715,114479,11636,67863,11676,27402,13807,14571,78830,67680,78920,14732,104112,230163,78801,246787,319848,17448,241612,14081,18642,109342,216019,15275,28169,212032,12709,67512,12183,66445,67895,269951
pa_hs_c_167	Phosphatidic acid synthesis	41	118	0.347458	0.485279	0	50799,22273,68262,17768,56421,100705,54403,14194,20537,12715,11636,67863,11676,27402,13807,14571,78830,67680,78920,14732,20505,104112,230163,78801,246787,17448,241612,14081,18642,109342,216019,15275,20531,28169,212032,12709,67512,12183,66445,67895,269951
pa_hs_c_180	Phosphatidic acid synthesis	41	118	0.347458	0.485279	0	50799,22273,68262,218756,17768,56421,100705,14194,20537,12715,11636,67863,11676,27402,13807,14571,78830,67680,78920,14732,20505,104112,230163,78801,246787,17448,241612,14081,18642,109342,216019,15275,20531,28169,212032,12709,67512,12183,66445,67895,269951
pa_hs_c_200	Phosphatidic acid synthesis	41	118	0.347458	0.485279	0	50799,22273,68262,17768,56421,76459,100705,54403,14194,20537,12715,11636,67863,11676,27402,13807,14571,78830,67680,78920,14732,20505,104112,230163,78801,17448,14081,18642,216019,15275,20531,28169,212032,12709,12351,67512,12183,66445,67895,269951,71934
tag_hs_c_252	Triacylglycerol synthesis	41	118	0.347458	0.485279	0	50799,22273,68262,218756,67800,17768,56421,17252,100705,54403,14194,20537,12715,11636,67863,11676,27402,13807,14571,78830,67680,78920,14732,104112,230163,78801,50784,17448,14081,18642,216019,15275,28169,212032,12709,67512,12183,66445,67895,269951,13350
dag_hs_c_222	Diacylglycerol synthesis	42	121	0.347107	0.48755	0	50799,22273,68262,17768,56421,76459,100705,14194,20537,12715,11636,67863,11676,27402,13807,14571,78830,67680,78920,14732,104112,230163,78801,246787,50784,17448,241612,14081,18642,109342,216019,15275,28169,212032,12709,12351,67512,12183,66445,67895,269951,71934
pa_hs_c_106	Phosphatidic acid synthesis	42	121	0.347107	0.48755	0	50799,22273,68262,17768,56421,76459,100705,14194,20537,12715,11636,67863,11676,27402,13807,14571,78830,67680,78920,14732,104112,230163,78801,246787,20515,17448,241612,14081,18642,109342,216019,15275,28169,212032,12709,12351,67512,12183,66445,67895,269951,71934
pa_hs_c_195	Phosphatidic acid synthesis	42	121	0.347107	0.48755	0	50799,22273,68262,17768,56421,17252,100705,54403,14194,20537,12715,11636,67863,11676,27402,13807,14571,78830,67680,78920,14732,20505,104112,230163,78801,246787,17448,241612,14081,18642,109342,216019,15275,20531,28169,212032,12709,67512,12183,66445,67895,269951
pa_hs_c_86	Phosphatidic acid synthesis	42	121	0.347107	0.48755	0	50799,22273,68262,17768,56421,15929,76459,100705,54403,14194,20537,12715,11636,67863,11676,27402,13807,14571,78830,67680,78920,14732,20505,104112,230163,78801,20515,17448,14081,18642,216019,15275,20531,28169,212032,12709,12351,67512,12183,66445,67895,71934
tag_hs_c_143	Triacylglycerol synthesis	42	121	0.347107	0.48755	0	50799,22273,68262,67800,17768,56421,100705,54403,14194,12715,11636,67863,11676,27402,13807,14571,78830,67680,78920,14732,104112,230163,78801,246787,50784,17448,241612,14081,18642,109342,216019,15275,28169,212032,12709,67512,12183,16956,66445,67895,269951,13350
tag_hs_c_147	Triacylglycerol synthesis	42	121	0.347107	0.48755	0	50799,22273,68262,67800,17768,56421,100705,54403,14194,20537,12715,11636,67863,11676,27402,13807,14571,78830,67680,78920,14732,11428,104112,230163,78801,246787,50784,17448,241612,14081,18642,109342,216019,15275,28169,212032,12709,67512,12183,66445,67895,13350
tag_hs_c_166	Triacylglycerol synthesis	42	121	0.347107	0.48755	0	50799,22273,68262,67800,17768,56421,100705,54403,14194,20537,12715,11636,67863,11676,27402,13807,14571,78830,67680,78920,14732,104112,230163,78801,246787,50784,17448,241612,14081,18642,109342,216019,15275,28169,212032,12709,67512,12183,66445,67895,269951,13350
tag_hs_c_6	Triacylglycerol synthesis	42	121	0.347107	0.48755	0	50799,22273,68262,67800,17768,56421,100705,54403,14194,20537,12715,11636,67863,11676,27402,13807,14571,78830,67680,78920,14732,11428,104112,230163,78801,246787,50784,17448,241612,14081,18642,109342,216019,15275,28169,212032,12709,67512,12183,66445,67895,13350
tag_hs_c_98	Triacylglycerol synthesis	42	121	0.347107	0.48755	0	50799,22273,68262,67800,17768,56421,76459,100705,14194,20537,12715,114479,11636,67863,11676,27402,13807,14571,78830,67680,78920,14732,104112,230163,78801,50784,17448,14081,18642,216019,15275,28169,212032,12709,12351,67512,12183,66445,67895,269951,13350,71934
dag_hs_c_173	Diacylglycerol synthesis	43	124	0.346774	0.48977	0	50799,22273,68262,17768,56421,76459,100705,54403,14194,20537,12715,11636,67863,11676,27402,13807,14571,78830,67680,78920,14732,104112,230163,78801,246787,50784,17448,241612,14081,18642,109342,216019,15275,28169,212032,12709,12351,67512,12183,66445,67895,269951,71934
dag_hs_c_197	Diacylglycerol synthesis	43	124	0.346774	0.48977	0	50799,22273,68262,17768,56421,76459,100705,54403,14194,20537,12715,11636,67863,11676,27402,13807,14571,78830,67680,78920,14732,11428,104112,230163,78801,246787,50784,17448,241612,14081,18642,109342,216019,15275,28169,212032,12709,12351,67512,12183,66445,67895,71934
dag_hs_c_4	Diacylglycerol synthesis	43	124	0.346774	0.48977	0	50799,22273,68262,17768,56421,76459,100705,14194,20537,12715,114479,11636,67863,11676,27402,13807,14571,78830,67680,78920,14732,104112,230163,78801,246787,50784,17448,241612,14081,18642,109342,216019,15275,28169,212032,12709,12351,67512,12183,66445,67895,269951,71934
pa_hs_c_182	Phosphatidic acid synthesis	43	124	0.346774	0.48977	0	50799,22273,68262,17768,56421,76459,100705,54403,14194,12715,11636,67863,11676,27402,13807,14571,78830,67680,78920,14732,20505,104112,230163,78801,246787,17448,241612,14081,18642,109342,216019,15275,20531,28169,212032,12709,12351,67512,12183,66445,67895,269951,71934
pa_hs_c_207	Phosphatidic acid synthesis	43	124	0.346774	0.48977	0	50799,22273,68262,17768,56421,76459,100705,54403,14194,20537,12715,114479,11636,67863,11676,27402,13807,14571,78830,67680,78920,14732,11428,104112,230163,78801,246787,17448,241612,14081,18642,109342,216019,15275,28169,212032,12709,12351,67512,12183,66445,67895,71934
pa_hs_c_221	Phosphatidic acid synthesis	43	124	0.346774	0.48977	0	50799,22273,68262,17768,56421,76459,100705,54403,14194,20537,12715,11636,67863,11676,27402,13807,14571,78830,67680,78920,14732,104112,230163,78801,246787,20515,17448,241612,14081,18642,109342,216019,15275,28169,212032,12709,12351,67512,12183,66445,67895,269951,71934
pa_hs_c_29	Phosphatidic acid synthesis	43	124	0.346774	0.48977	0	50799,22273,68262,17768,56421,76459,100705,54403,14194,12715,11636,67863,11676,27402,13807,14571,78830,67680,78920,14732,20505,104112,230163,78801,246787,17448,241612,14081,18642,109342,216019,15275,20531,28169,212032,12709,12351,67512,12183,66445,67895,269951,71934
pa_hs_c_89	Phosphatidic acid synthesis	43	124	0.346774	0.48977	0	50799,22273,68262,17768,56421,76459,100705,54403,14194,20537,12715,11636,67863,11676,27402,13807,14571,78830,67680,78920,14732,104112,230163,78801,246787,20515,17448,241612,14081,18642,109342,216019,15275,28169,212032,12709,12351,67512,12183,66445,67895,269951,71934
tag_hs_c_142	Triacylglycerol synthesis	43	124	0.346774	0.48977	0	50799,22273,68262,67800,56421,76459,100705,54403,14194,20537,12715,11636,67863,11676,27402,13807,78830,67680,78920,14732,104112,230163,78801,246787,50784,17448,241612,14081,18642,109342,216019,15275,28169,212032,12709,12351,67512,12183,66445,67895,269951,13350,71934
dag_hs_c_18	Diacylglycerol synthesis	44	127	0.346457	0.49194	0	50799,22273,68262,17768,56421,76459,100705,54403,14194,20537,12715,114479,11636,67863,11676,27402,13807,14571,78830,67680,78920,14732,104112,230163,78801,246787,50784,17448,241612,14081,18642,109342,216019,15275,28169,212032,12709,12351,67512,12183,66445,67895,269951,71934
dag_hs_c_95	Diacylglycerol synthesis	44	127	0.346457	0.49194	0	50799,22273,68262,17768,56421,76459,100705,54403,14194,20537,12715,114479,11636,67863,11676,27402,13807,14571,78830,67680,78920,14732,104112,230163,78801,246787,50784,17448,241612,14081,18642,109342,216019,15275,28169,212032,12709,12351,67512,12183,66445,67895,269951,71934
pa_hs_c_119	Phosphatidic acid synthesis	44	127	0.346457	0.49194	0	50799,22273,68262,218756,17768,56421,76459,100705,20544,14194,20537,12715,11636,67863,11676,27402,13807,14571,78830,67680,78920,14732,104112,230163,78801,246787,20515,17448,241612,14081,18642,109342,216019,15275,28169,212032,12709,12351,67512,12183,66445,67895,269951,71934
pa_hs_c_140	Phosphatidic acid synthesis	44	127	0.346457	0.49194	0	50799,22273,68262,17768,56421,17252,76459,100705,14194,20537,12715,11636,67863,11676,27402,13807,14571,78830,67680,78920,14732,20505,104112,230163,78801,246787,17448,241612,14081,18642,109342,216019,15275,20531,28169,212032,12709,12351,67512,12183,66445,67895,269951,71934
pa_hs_c_15	Phosphatidic acid synthesis	44	127	0.346457	0.49194	0	50799,22273,68262,17768,56421,15929,76459,100705,54403,14194,20537,12715,11636,67863,11676,27402,13807,14571,78830,67680,78920,14732,20505,104112,230163,78801,246787,17448,241612,14081,18642,109342,216019,15275,20531,28169,212032,12709,12351,67512,12183,66445,67895,71934
pa_hs_c_242	Phosphatidic acid synthesis	44	127	0.346457	0.49194	0	50799,22273,68262,17768,56421,76459,100705,54403,14194,20537,12715,11636,67863,11676,27402,13807,14571,78830,67680,78920,14732,20505,104112,230163,78801,246787,17448,241612,14081,18642,109342,216019,15275,20531,28169,212032,12709,12351,67512,12183,66445,67895,269951,71934
pa_hs_c_33	Phosphatidic acid synthesis	44	127	0.346457	0.49194	0	50799,22273,68262,17768,56421,15929,76459,100705,54403,14194,20537,12715,11636,67863,11676,27402,13807,14571,78830,67680,78920,14732,20505,104112,230163,78801,246787,17448,241612,14081,18642,109342,216019,15275,20531,28169,212032,12709,12351,67512,12183,66445,67895,71934
tag_hs_c_133	Triacylglycerol synthesis	44	127	0.346457	0.49194	0	50799,22273,69519,68262,67800,56421,76459,100705,54403,14194,20537,12715,11636,67863,11676,27402,13807,78830,67680,78920,14732,104112,230163,78801,246787,50784,17448,241612,14081,18642,109342,216019,15275,28169,212032,12709,12351,67512,12183,66445,67895,269951,13350,71934
tag_hs_c_149	Triacylglycerol synthesis	44	127	0.346457	0.49194	0	50799,22273,69519,68262,67800,56421,76459,100705,54403,14194,20537,12715,11636,67863,11676,27402,13807,78830,67680,78920,14732,104112,230163,78801,246787,50784,17448,241612,14081,18642,109342,216019,15275,28169,212032,12709,12351,67512,12183,66445,67895,269951,13350,71934
tag_hs_c_156	Triacylglycerol synthesis	44	127	0.346457	0.49194	0	50799,22273,68262,67800,17768,56421,76459,100705,14194,12715,11636,67863,11676,27402,13807,14571,78830,67680,78920,14732,11428,104112,230163,78801,246787,50784,17448,241612,14081,18642,109342,216019,15275,28169,212032,12709,12351,67512,12183,16956,66445,67895,13350,71934
tag_hs_c_177	Triacylglycerol synthesis	44	127	0.346457	0.49194	0	50799,22273,69519,68262,67800,56421,76459,100705,54403,14194,20537,12715,11636,67863,11676,27402,13807,78830,67680,78920,14732,104112,230163,78801,246787,50784,17448,241612,14081,18642,109342,216019,15275,28169,212032,12709,12351,67512,12183,66445,67895,269951,13350,71934
tag_hs_c_183	Triacylglycerol synthesis	44	127	0.346457	0.49194	0	50799,22273,68262,67800,17768,56421,76459,100705,14194,12715,11636,67863,11676,27402,13807,14571,78830,67680,78920,14732,11428,104112,230163,78801,246787,50784,17448,241612,14081,18642,109342,216019,15275,28169,212032,12709,12351,67512,12183,16956,66445,67895,13350,71934
tag_hs_c_188	Triacylglycerol synthesis	44	127	0.346457	0.49194	0	50799,22273,68262,218756,67800,17768,56421,15929,17252,100705,14194,20537,12715,11636,67863,11676,27402,13807,14571,78830,67680,78920,14732,104112,230163,78801,246787,50784,17448,241612,14081,18642,109342,216019,15275,28169,212032,12709,67512,12183,16956,66445,67895,13350
tag_hs_c_192	Triacylglycerol synthesis	44	127	0.346457	0.49194	0	50799,22273,68262,67800,17768,56421,76459,100705,54403,14194,12715,11636,67863,11676,27402,13807,14571,78830,67680,78920,14732,104112,230163,78801,246787,50784,17448,241612,14081,18642,109342,216019,15275,28169,212032,12709,12351,67512,12183,66445,67895,269951,13350,71934
tag_hs_c_207	Triacylglycerol synthesis	44	127	0.346457	0.49194	0	50799,22273,68262,67800,17768,56421,76459,100705,54403,14194,12715,11636,67863,11676,27402,13807,14571,78830,67680,78920,14732,104112,230163,78801,246787,50784,17448,241612,14081,18642,109342,216019,15275,28169,212032,12709,12351,67512,12183,66445,67895,269951,13350,71934
tag_hs_c_219	Triacylglycerol synthesis	44	127	0.346457	0.49194	0	50799,22273,68262,67800,17768,56421,15929,76459,100705,14194,20537,12715,11636,67863,11676,27402,13807,14571,78830,67680,78920,14732,104112,230163,78801,246787,50784,17448,241612,14081,18642,109342,216019,15275,28169,212032,12709,12351,67512,12183,66445,67895,13350,71934
tag_hs_c_3	Triacylglycerol synthesis	44	127	0.346457	0.49194	0	50799,22273,68262,67800,17768,56421,76459,100705,14194,20537,12715,11636,67863,11676,27402,13807,14571,78830,67680,78920,14732,104112,230163,78801,246787,50784,17448,241612,14081,18642,109342,216019,15275,28169,212032,12709,12351,67512,12183,66445,67895,269951,13350,71934
tag_hs_c_54	Triacylglycerol synthesis	44	127	0.346457	0.49194	0	50799,22273,68262,67800,17768,56421,17252,100705,54403,14194,20537,12715,114479,11636,67863,11676,27402,13807,14571,78830,67680,78920,14732,11428,104112,230163,78801,246787,50784,17448,241612,14081,18642,109342,216019,15275,28169,212032,12709,67512,12183,66445,67895,13350
pa_hs_c_135	Phosphatidic acid synthesis	45	130	0.346154	0.494064	0	50799,22273,68262,17768,56421,17252,76459,100705,14194,20537,12715,114479,11636,67863,11676,27402,13807,14571,78830,67680,78920,14732,20505,104112,230163,78801,246787,17448,241612,14081,18642,109342,216019,15275,20531,28169,212032,12709,12351,67512,12183,66445,67895,269951,71934
pa_hs_c_58	Phosphatidic acid synthesis	45	130	0.346154	0.494064	0	50799,22273,68262,17768,56421,17252,76459,100705,54403,14194,20537,12715,114479,11636,67863,11676,27402,13807,14571,78830,67680,78920,14732,104112,230163,78801,246787,20515,17448,241612,14081,18642,109342,216019,15275,28169,212032,12709,12351,67512,12183,66445,67895,269951,71934
tag_hs_c_110	Triacylglycerol synthesis	45	130	0.346154	0.494064	0	50799,22273,68262,67800,17768,56421,76459,100705,14194,20537,12715,11636,67863,11676,27402,13807,14571,78830,67680,78920,14732,11428,104112,230163,78801,246787,50784,17448,241612,14081,18642,109342,216019,15275,28169,212032,12709,12351,67512,12183,16956,66445,67895,13350,71934
tag_hs_c_152	Triacylglycerol synthesis	45	130	0.346154	0.494064	0	50799,22273,68262,67800,17768,56421,17252,76459,100705,14194,20537,12715,11636,67863,11676,27402,13807,14571,78830,67680,78920,14732,104112,230163,78801,246787,50784,17448,241612,14081,18642,109342,216019,15275,28169,212032,12709,12351,67512,12183,66445,67895,269951,13350,71934
tag_hs_c_245	Triacylglycerol synthesis	45	130	0.346154	0.494064	0	50799,22273,68262,67800,17768,56421,17252,76459,100705,14194,20537,12715,11636,67863,11676,27402,13807,14571,78830,67680,78920,14732,11428,104112,230163,78801,246787,50784,17448,241612,14081,18642,109342,216019,15275,28169,212032,12709,12351,67512,12183,66445,67895,13350,71934
tag_hs_c_20	Triacylglycerol synthesis	46	133	0.345865	0.496144	0	50799,22273,68262,67800,17768,56421,17252,76459,100705,14194,20537,12715,114479,11636,67863,11676,27402,13807,14571,78830,67680,78920,14732,104112,230163,78801,246787,50784,17448,241612,14081,18642,109342,216019,15275,28169,212032,12709,12351,67512,12183,66445,67895,269951,13350,71934
tag_hs_c_227	Triacylglycerol synthesis	46	133	0.345865	0.496144	0	50799,22273,68262,67800,17768,56421,17252,76459,100705,14194,20537,12715,11636,67863,11676,27402,13807,14571,78830,67680,78920,14732,104112,230163,78801,246787,50784,17448,241612,14081,18642,109342,216019,15275,28169,212032,12709,12351,67512,12183,16956,66445,67895,269951,13350,71934
tag_hs_c_80	Triacylglycerol synthesis	46	133	0.345865	0.496144	0	50799,22273,68262,67800,17768,56421,17252,76459,100705,54403,14194,20537,12715,11636,67863,11676,27402,13807,14571,78830,67680,78920,14732,11428,104112,230163,78801,246787,50784,17448,241612,14081,18642,109342,216019,15275,28169,212032,12709,12351,67512,12183,66445,67895,13350,71934
h2o2_m_110	Hydrogen peroxide synthesis	21	60	0.35	0.497153	0	76459,54403,20544,20537,114479,11676,13807,66171,14120,230163,110208,74419,216019,15275,212032,21881,52815,12351,12183,21351,71934
h2o2_m_25	Hydrogen peroxide synthesis	21	60	0.35	0.497153	0	76459,54403,20544,20537,114479,11676,13807,66171,14120,230163,110208,74419,216019,15275,212032,21881,52815,12351,12183,21351,71934
h2o2_m_31	Hydrogen peroxide synthesis	21	60	0.35	0.497153	0	76459,54403,20544,20537,114479,11676,13807,66171,14120,230163,110208,74419,216019,15275,212032,21881,52815,12351,12183,21351,71934
h2o2_m_34	Hydrogen peroxide synthesis	21	60	0.35	0.497153	0	76459,54403,20544,20537,114479,11676,13807,66171,14120,230163,110208,74419,216019,15275,212032,21881,52815,12351,12183,21351,71934
h2o2_m_65	Hydrogen peroxide synthesis	21	60	0.35	0.497153	0	76459,54403,20544,20537,114479,11676,13807,66171,14120,230163,110208,74419,216019,15275,212032,21881,52815,12351,12183,21351,71934
tag_hs_c_101	Triacylglycerol synthesis	47	136	0.345588	0.498181	0	50799,22273,68262,67800,17768,56421,17252,76459,100705,54403,14194,20537,12715,114479,11636,67863,11676,27402,13807,14571,78830,67680,78920,14732,11428,104112,230163,78801,246787,50784,17448,241612,14081,18642,109342,216019,15275,28169,212032,12709,12351,67512,12183,66445,67895,13350,71934
pail_hs_c_48	Phosphatidylinositol synthesis	49	142	0.34507	0.502139	0	50799,22273,68262,17768,56421,17252,76459,110446,100705,54403,78894,67041,14194,20537,12715,114479,11636,67863,11676,27402,13807,14571,78830,67680,78920,14732,224530,230163,78801,246787,114663,20515,17448,241612,14081,18642,109342,216019,15275,28169,212032,12709,12351,67512,12183,66445,67895,269951,71934
dag_hs_c_159	Diacylglycerol synthesis	39	113	0.345133	0.50883	0	50799,22273,68262,17768,56421,100705,54403,14194,20537,12715,114479,11636,67863,11676,27402,13807,14571,78830,67680,78920,14732,11428,104112,230163,78801,246787,50784,17448,14081,18642,216019,15275,28169,212032,12709,67512,12183,66445,67895
pa_hs_c_38	Phosphatidic acid synthesis	39	113	0.345133	0.50883	0	50799,22273,68262,17768,56421,100705,54403,14194,20537,12715,11636,67863,11676,27402,13807,14571,78830,67680,78920,14732,11428,20505,104112,230163,78801,246787,17448,14081,18642,216019,15275,20531,28169,212032,12709,67512,12183,66445,67895
tag_hs_c_113	Triacylglycerol synthesis	39	113	0.345133	0.50883	0	50799,22273,69519,68262,218756,67800,56421,100705,14194,20537,12715,11636,67863,11676,27402,13807,78830,67680,78920,14732,104112,230163,78801,246787,50784,17448,14081,18642,216019,15275,28169,212032,12709,67512,12183,66445,67895,269951,13350
tag_hs_c_160	Triacylglycerol synthesis	39	113	0.345133	0.50883	0	50799,22273,69519,68262,218756,67800,56421,100705,14194,20537,12715,11636,67863,11676,27402,13807,78830,67680,78920,14732,104112,230163,78801,246787,50784,17448,14081,18642,216019,15275,28169,212032,12709,67512,12183,66445,67895,269951,13350
tag_hs_c_18	Triacylglycerol synthesis	39	113	0.345133	0.50883	0	50799,22273,68262,67800,17768,56421,100705,54403,14194,20537,12715,11636,67863,11676,27402,13807,14571,78830,67680,78920,14732,104112,230163,78801,50784,17448,14081,18642,216019,15275,28169,212032,12709,67512,12183,66445,67895,269951,13350
tag_hs_c_58	Triacylglycerol synthesis	39	113	0.345133	0.50883	0	50799,22273,69519,68262,218756,67800,56421,100705,14194,20537,12715,11636,67863,11676,27402,13807,78830,67680,78920,14732,104112,230163,78801,246787,50784,17448,14081,18642,216019,15275,28169,212032,12709,67512,12183,66445,67895,269951,13350
tag_hs_c_68	Triacylglycerol synthesis	39	113	0.345133	0.50883	0	50799,22273,69519,68262,218756,67800,56421,100705,14194,20537,12715,11636,67863,11676,27402,13807,78830,67680,78920,14732,104112,230163,78801,246787,50784,17448,14081,18642,216019,15275,28169,212032,12709,67512,12183,66445,67895,269951,13350
dag_hs_c_145	Diacylglycerol synthesis	40	116	0.344828	0.510874	0	50799,22273,68262,17768,56421,100705,54403,14194,20537,12715,11636,67863,11676,27402,13807,14571,78830,67680,78920,14732,104112,230163,78801,246787,50784,17448,241612,14081,18642,109342,216019,15275,28169,212032,12709,67512,12183,66445,67895,269951
dag_hs_c_221	Diacylglycerol synthesis	40	116	0.344828	0.510874	0	50799,22273,68262,17768,56421,15929,100705,54403,14194,20537,12715,11636,67863,11676,27402,13807,14571,78830,67680,78920,14732,104112,230163,78801,246787,50784,17448,241612,14081,18642,109342,216019,15275,28169,212032,12709,67512,12183,66445,67895
pa_hs_c_152	Phosphatidic acid synthesis	40	116	0.344828	0.510874	0	50799,22273,68262,17768,56421,100705,54403,14194,20537,12715,114479,11636,67863,11676,27402,13807,14571,78830,67680,78920,14732,20505,104112,230163,78801,246787,17448,14081,18642,216019,15275,20531,28169,212032,12709,67512,12183,66445,67895,269951
pa_hs_c_204	Phosphatidic acid synthesis	40	116	0.344828	0.510874	0	50799,22273,68262,17768,56421,15929,100705,54403,14194,20537,12715,11636,67863,11676,27402,13807,14571,78830,67680,78920,14732,104112,230163,78801,246787,319848,17448,241612,14081,18642,109342,216019,15275,28169,212032,12709,67512,12183,66445,67895
pa_hs_c_79	Phosphatidic acid synthesis	40	116	0.344828	0.510874	0	50799,22273,68262,218756,17768,56421,15929,100705,54403,20544,14194,12715,11636,67863,11676,27402,13807,14571,78830,67680,78920,14732,20505,104112,230163,78801,246787,17448,14081,18642,216019,15275,20531,28169,212032,12709,67512,12183,66445,67895
tag_hs_c_11	Triacylglycerol synthesis	40	116	0.344828	0.510874	0	50799,22273,68262,67800,17768,56421,100705,54403,14194,20537,12715,11636,67863,11676,27402,13807,14571,78830,67680,78920,14732,11428,104112,230163,78801,246787,50784,17448,14081,18642,216019,15275,28169,212032,12709,67512,12183,66445,67895,13350
tag_hs_c_127	Triacylglycerol synthesis	40	116	0.344828	0.510874	0	50799,22273,68262,218756,67800,17768,56421,100705,14194,20537,12715,11636,67863,11676,27402,13807,14571,78830,67680,78920,14732,11428,104112,230163,78801,246787,50784,17448,14081,18642,216019,15275,28169,212032,12709,67512,12183,66445,67895,13350
dag_hs_c_167	Diacylglycerol synthesis	41	119	0.344538	0.512872	0	50799,22273,68262,17768,56421,100705,54403,20544,14194,20537,12715,11636,67863,11676,27402,13807,14571,78830,67680,78920,14732,104112,230163,78801,246787,50784,17448,241612,14081,18642,109342,216019,15275,28169,212032,12709,67512,12183,66445,67895,269951
dag_hs_c_72	Diacylglycerol synthesis	41	119	0.344538	0.512872	0	50799,22273,68262,218756,17768,56421,100705,54403,14194,20537,12715,11636,67863,11676,27402,13807,14571,78830,67680,78920,14732,104112,230163,78801,246787,50784,17448,241612,14081,18642,109342,216019,15275,28169,212032,12709,67512,12183,66445,67895,269951
pa_hs_c_84	Phosphatidic acid synthesis	41	119	0.344538	0.512872	0	50799,22273,68262,17768,56421,76459,100705,54403,14194,20537,12715,11636,67863,11676,27402,13807,14571,78830,67680,78920,14732,20505,104112,230163,78801,17448,14081,18642,216019,15275,20531,28169,212032,12709,12351,67512,12183,66445,67895,269951,71934
tag_hs_c_107	Triacylglycerol synthesis	41	119	0.344538	0.512872	0	50799,22273,68262,67800,17768,56421,15929,100705,54403,20544,14194,20537,12715,11636,67863,11676,27402,13807,14571,78830,67680,78920,14732,104112,230163,78801,246787,50784,17448,14081,18642,216019,15275,28169,212032,12709,67512,12183,66445,67895,13350
dag_hs_c_200	Diacylglycerol synthesis	42	122	0.344262	0.514827	0	50799,22273,68262,17768,56421,76459,100705,14194,20537,12715,11636,67863,11676,27402,13807,14571,78830,67680,78920,14732,104112,230163,78801,246787,50784,17448,241612,14081,18642,109342,216019,15275,28169,212032,12709,12351,67512,12183,66445,67895,269951,71934
dag_hs_c_57	Diacylglycerol synthesis	42	122	0.344262	0.514827	0	50799,22273,68262,17768,56421,76459,100705,14194,20537,12715,11636,67863,11676,27402,13807,14571,78830,67680,78920,14732,11428,104112,230163,78801,246787,50784,17448,241612,14081,18642,109342,216019,15275,28169,212032,12709,12351,67512,12183,66445,67895,71934
pa_hs_c_108	Phosphatidic acid synthesis	42	122	0.344262	0.514827	0	50799,22273,68262,17768,56421,76459,100705,20544,14194,12715,11636,67863,11676,27402,13807,14571,78830,67680,78920,14732,20505,104112,230163,78801,246787,20515,17448,14081,18642,216019,15275,20531,28169,212032,12709,12351,67512,12183,66445,67895,269951,71934
pa_hs_c_201	Phosphatidic acid synthesis	42	122	0.344262	0.514827	0	50799,22273,68262,17768,56421,76459,100705,54403,14194,20537,12715,11636,67863,11676,27402,13807,14571,78830,67680,78920,14732,11428,104112,230163,78801,246787,17448,241612,14081,18642,109342,216019,15275,28169,212032,12709,12351,67512,12183,66445,67895,71934
pa_hs_c_212	Phosphatidic acid synthesis	42	122	0.344262	0.514827	0	50799,22273,68262,17768,56421,76459,100705,14194,20537,12715,11636,67863,11676,27402,13807,14571,78830,67680,78920,14732,104112,230163,78801,246787,20515,17448,241612,14081,18642,109342,216019,15275,28169,212032,12709,12351,67512,12183,66445,67895,269951,71934
pa_hs_c_227	Phosphatidic acid synthesis	42	122	0.344262	0.514827	0	50799,22273,68262,17768,56421,76459,100705,54403,14194,20537,12715,11636,67863,11676,27402,13807,14571,78830,67680,78920,14732,11428,104112,230163,78801,246787,17448,241612,14081,18642,109342,216019,15275,28169,212032,12709,12351,67512,12183,66445,67895,71934
pa_hs_c_232	Phosphatidic acid synthesis	42	122	0.344262	0.514827	0	50799,22273,68262,17768,56421,76459,100705,54403,14194,20537,12715,11636,67863,11676,27402,13807,14571,78830,67680,78920,14732,20505,104112,230163,78801,20515,17448,14081,18642,216019,15275,20531,28169,212032,12709,12351,67512,12183,66445,67895,269951,71934
tag_hs_c_117	Triacylglycerol synthesis	42	122	0.344262	0.514827	0	50799,22273,68262,67800,17768,56421,76459,100705,14194,20537,12715,11636,67863,11676,27402,13807,14571,78830,67680,78920,14732,104112,230163,78801,50784,17448,14081,18642,216019,15275,28169,212032,12709,12351,67512,12183,16956,66445,67895,269951,13350,71934
tag_hs_c_229	Triacylglycerol synthesis	42	122	0.344262	0.514827	0	50799,22273,68262,67800,17768,56421,76459,100705,14194,20537,12715,11636,67863,11676,27402,13807,14571,78830,67680,78920,14732,104112,230163,78801,246787,50784,17448,14081,18642,216019,15275,28169,212032,12709,12351,67512,12183,66445,67895,269951,13350,71934
tag_hs_c_41	Triacylglycerol synthesis	42	122	0.344262	0.514827	0	50799,22273,68262,67800,17768,56421,15929,17252,100705,54403,14194,20537,12715,114479,11636,67863,11676,27402,13807,14571,78830,67680,78920,14732,104112,230163,78801,50784,17448,14081,18642,216019,15275,28169,212032,12709,67512,12183,16956,66445,67895,13350
dag_hs_c_205	Diacylglycerol synthesis	43	125	0.344	0.516742	0	50799,22273,68262,17768,56421,76459,100705,14194,20537,12715,114479,11636,67863,11676,27402,13807,14571,78830,67680,78920,14732,104112,230163,78801,246787,50784,17448,241612,14081,18642,109342,216019,15275,28169,212032,12709,12351,67512,12183,66445,67895,269951,71934
dag_hs_c_217	Diacylglycerol synthesis	43	125	0.344	0.516742	0	50799,22273,68262,17768,56421,76459,100705,54403,14194,20537,12715,11636,67863,11676,27402,13807,14571,78830,67680,78920,14732,104112,230163,78801,246787,50784,17448,241612,14081,18642,109342,216019,15275,28169,212032,12709,12351,67512,12183,66445,67895,269951,71934
dag_hs_c_232	Diacylglycerol synthesis	43	125	0.344	0.516742	0	50799,22273,68262,17768,56421,76459,100705,54403,14194,20537,12715,11636,67863,11676,27402,13807,14571,78830,67680,78920,14732,104112,230163,78801,246787,50784,17448,241612,14081,18642,109342,216019,15275,28169,212032,12709,12351,67512,12183,66445,67895,269951,71934
hdca_c_134	Hexadecanoate synthesis	43	125	0.344	0.516742	0	50799,22273,56421,15929,76459,110446,100705,54403,78894,67041,14194,20537,12715,114479,11636,67863,11676,27402,13807,78830,67680,78920,224530,11409,230163,78801,246787,17448,241612,14081,18642,109342,216019,15275,212032,12709,12351,78070,12183,57279,66445,67895,71934
hdca_c_29	Hexadecanoate synthesis	43	125	0.344	0.516742	0	50799,22273,56421,15929,76459,110446,100705,54403,78894,67041,14194,20537,12715,114479,11636,67863,11676,27402,13807,78830,67680,78920,224530,11409,230163,78801,246787,17448,241612,14081,18642,109342,216019,15275,212032,12709,12351,78070,12183,57279,66445,67895,71934
hdca_c_70	Hexadecanoate synthesis	43	125	0.344	0.516742	0	50799,22273,218756,56421,15929,76459,110446,100705,78894,67041,14194,20537,12715,114479,11636,67863,11676,27402,13807,78830,67680,78920,224530,11409,230163,78801,246787,17448,241612,14081,18642,109342,216019,15275,212032,12709,12351,78070,12183,57279,66445,67895,71934
pa_hs_c_112	Phosphatidic acid synthesis	43	125	0.344	0.516742	0	50799,22273,68262,218756,17768,56421,76459,100705,14194,20537,12715,11636,67863,11676,27402,13807,14571,78830,67680,78920,14732,104112,230163,78801,246787,319848,17448,241612,14081,18642,109342,216019,15275,28169,212032,12709,12351,67512,12183,66445,67895,269951,71934
pa_hs_c_113	Phosphatidic acid synthesis	43	125	0.344	0.516742	0	50799,22273,68262,17768,56421,76459,100705,54403,14194,20537,12715,11636,67863,11676,27402,13807,14571,78830,67680,78920,14732,104112,230163,78801,246787,20515,17448,241612,14081,18642,109342,216019,15275,28169,212032,12709,12351,67512,12183,66445,67895,269951,71934
pa_hs_c_198	Phosphatidic acid synthesis	43	125	0.344	0.516742	0	50799,22273,68262,17768,56421,17252,76459,100705,54403,14194,20537,12715,114479,11636,67863,11676,27402,13807,14571,78830,67680,78920,14732,20505,104112,230163,78801,17448,14081,18642,216019,15275,20531,28169,212032,12709,12351,67512,12183,66445,67895,269951,71934
pa_hs_c_32	Phosphatidic acid synthesis	43	125	0.344	0.516742	0	50799,22273,68262,17768,56421,76459,100705,20544,14194,20537,12715,114479,11636,67863,11676,27402,13807,14571,78830,67680,78920,14732,104112,230163,78801,246787,17448,241612,14081,18642,109342,216019,15275,28169,212032,12709,12351,67512,12183,66445,67895,269951,71934
pa_hs_c_94	Phosphatidic acid synthesis	43	125	0.344	0.516742	0	50799,22273,68262,17768,56421,76459,100705,54403,14194,20537,12715,11636,67863,11676,27402,13807,14571,78830,67680,78920,14732,11428,104112,230163,78801,246787,20515,17448,241612,14081,18642,109342,216019,15275,28169,212032,12709,12351,67512,12183,66445,67895,71934
tag_hs_c_162	Triacylglycerol synthesis	43	125	0.344	0.516742	0	50799,22273,68262,67800,17768,56421,17252,100705,54403,14194,20537,12715,11636,67863,11676,27402,13807,14571,78830,67680,78920,14732,104112,230163,78801,246787,50784,17448,241612,14081,18642,109342,216019,15275,28169,212032,12709,67512,12183,66445,67895,269951,13350
tag_hs_c_21	Triacylglycerol synthesis	43	125	0.344	0.516742	0	50799,22273,69519,68262,218756,67800,56421,76459,100705,54403,14194,20537,12715,11636,67863,11676,27402,13807,78830,67680,78920,14732,104112,230163,78801,246787,50784,17448,14081,18642,216019,15275,28169,212032,12709,12351,67512,12183,66445,67895,269951,13350,71934
tag_hs_c_218	Triacylglycerol synthesis	43	125	0.344	0.516742	0	50799,22273,68262,67800,17768,56421,17252,100705,54403,14194,20537,12715,11636,67863,11676,27402,13807,14571,78830,67680,78920,14732,104112,230163,78801,246787,50784,17448,241612,14081,18642,109342,216019,15275,28169,212032,12709,67512,12183,66445,67895,269951,13350
pa_hs_c_131	Phosphatidic acid synthesis	44	128	0.34375	0.518619	0	50799,22273,68262,17768,56421,76459,100705,54403,14194,20537,12715,114479,11636,67863,11676,27402,13807,14571,78830,67680,78920,14732,104112,230163,78801,246787,20515,17448,241612,14081,18642,109342,216019,15275,28169,212032,12709,12351,67512,12183,66445,67895,269951,71934
pa_hs_c_193	Phosphatidic acid synthesis	44	128	0.34375	0.518619	0	50799,22273,68262,218756,17768,56421,15929,76459,100705,14194,20537,12715,11636,67863,11676,27402,13807,14571,78830,67680,78920,14732,20505,104112,230163,78801,246787,17448,241612,14081,18642,109342,216019,15275,20531,28169,212032,12709,12351,67512,12183,66445,67895,71934
pa_hs_c_206	Phosphatidic acid synthesis	44	128	0.34375	0.518619	0	50799,22273,68262,17768,56421,15929,76459,100705,54403,14194,12715,11636,67863,11676,27402,13807,14571,78830,67680,78920,14732,20505,104112,230163,78801,246787,20515,17448,241612,14081,18642,109342,216019,15275,20531,28169,212032,12709,12351,67512,12183,66445,67895,71934
tag_hs_c_121	Triacylglycerol synthesis	44	128	0.34375	0.518619	0	50799,22273,68262,67800,17768,56421,76459,100705,54403,14194,12715,11636,67863,11676,27402,13807,14571,78830,67680,78920,14732,11428,104112,230163,78801,246787,50784,17448,241612,14081,18642,109342,216019,15275,28169,212032,12709,12351,67512,12183,66445,67895,13350,71934
tag_hs_c_124	Triacylglycerol synthesis	44	128	0.34375	0.518619	0	50799,22273,68262,218756,67800,17768,56421,15929,17252,100705,54403,14194,20537,12715,11636,67863,11676,27402,13807,14571,78830,67680,78920,14732,104112,230163,78801,246787,50784,17448,241612,14081,18642,109342,216019,15275,28169,212032,12709,67512,12183,66445,67895,13350
tag_hs_c_126	Triacylglycerol synthesis	44	128	0.34375	0.518619	0	50799,22273,68262,67800,17768,56421,17252,100705,54403,14194,20537,12715,114479,11636,67863,11676,27402,13807,14571,78830,67680,78920,14732,11428,104112,230163,78801,246787,50784,17448,241612,14081,18642,109342,216019,15275,28169,212032,12709,67512,12183,66445,67895,13350
tag_hs_c_168	Triacylglycerol synthesis	44	128	0.34375	0.518619	0	50799,22273,68262,67800,17768,56421,76459,100705,14194,20537,12715,11636,67863,11676,27402,13807,14571,78830,67680,78920,14732,104112,230163,78801,246787,50784,17448,241612,14081,18642,109342,216019,15275,28169,212032,12709,12351,67512,12183,66445,67895,269951,13350,71934
tag_hs_c_196	Triacylglycerol synthesis	44	128	0.34375	0.518619	0	50799,22273,68262,67800,17768,56421,76459,100705,54403,14194,12715,11636,67863,11676,27402,13807,14571,78830,67680,78920,14732,11428,104112,230163,78801,246787,50784,17448,241612,14081,18642,109342,216019,15275,28169,212032,12709,12351,67512,12183,66445,67895,13350,71934
tag_hs_c_22	Triacylglycerol synthesis	44	128	0.34375	0.518619	0	50799,22273,68262,67800,17768,56421,76459,100705,14194,20537,12715,11636,67863,11676,27402,13807,14571,78830,67680,78920,14732,104112,230163,78801,246787,50784,17448,241612,14081,18642,109342,216019,15275,28169,212032,12709,12351,67512,12183,66445,67895,269951,13350,71934
tag_hs_c_225	Triacylglycerol synthesis	44	128	0.34375	0.518619	0	50799,22273,69519,68262,218756,67800,56421,76459,100705,14194,20537,12715,11636,67863,11676,27402,13807,78830,67680,78920,14732,104112,230163,78801,246787,50784,17448,241612,14081,18642,109342,216019,15275,28169,212032,12709,12351,67512,12183,66445,67895,269951,13350,71934
tag_hs_c_24	Triacylglycerol synthesis	44	128	0.34375	0.518619	0	50799,22273,68262,67800,17768,56421,76459,100705,54403,14194,12715,11636,67863,11676,27402,13807,14571,78830,67680,78920,14732,11428,104112,230163,78801,246787,50784,17448,241612,14081,18642,109342,216019,15275,28169,212032,12709,12351,67512,12183,66445,67895,13350,71934
tag_hs_c_47	Triacylglycerol synthesis	44	128	0.34375	0.518619	0	50799,22273,68262,67800,17768,56421,17252,76459,100705,54403,14194,20537,12715,114479,11636,67863,11676,27402,13807,14571,78830,67680,78920,14732,104112,230163,78801,50784,17448,14081,18642,216019,15275,28169,212032,12709,12351,67512,12183,66445,67895,269951,13350,71934
dag_hs_c_140	Diacylglycerol synthesis	45	131	0.343511	0.520459	0	50799,22273,68262,218756,17768,56421,17252,76459,100705,14194,20537,12715,11636,67863,11676,27402,13807,14571,78830,67680,78920,14732,104112,230163,107605,78801,246787,50784,17448,241612,14081,18642,109342,216019,15275,28169,212032,12709,12351,67512,12183,66445,67895,269951,71934
pa_hs_c_231	Phosphatidic acid synthesis	45	131	0.343511	0.520459	0	50799,22273,68262,218756,17768,56421,17252,76459,100705,14194,20537,12715,11636,67863,11676,27402,13807,14571,78830,67680,78920,14732,20505,104112,230163,78801,246787,17448,241612,14081,18642,109342,216019,15275,20531,28169,212032,12709,12351,67512,12183,66445,67895,269951,71934
tag_hs_c_115	Triacylglycerol synthesis	45	131	0.343511	0.520459	0	50799,22273,68262,67800,17768,56421,76459,100705,20544,14194,20537,12715,11636,67863,11676,27402,13807,14571,78830,67680,78920,14732,104112,230163,78801,246787,50784,17448,241612,14081,18642,109342,216019,15275,28169,212032,12709,12351,67512,12183,66445,67895,269951,13350,71934
tag_hs_c_132	Triacylglycerol synthesis	45	131	0.343511	0.520459	0	50799,22273,68262,67800,17768,56421,17252,76459,100705,54403,14194,12715,11636,67863,11676,27402,13807,14571,78830,67680,78920,14732,11428,104112,230163,78801,246787,50784,17448,241612,14081,18642,109342,216019,15275,28169,212032,12709,12351,67512,12183,66445,67895,13350,71934
tag_hs_c_167	Triacylglycerol synthesis	45	131	0.343511	0.520459	0	50799,22273,68262,67800,17768,56421,15929,17252,76459,100705,14194,20537,12715,11636,67863,11676,27402,13807,14571,78830,67680,78920,14732,104112,230163,78801,246787,50784,17448,241612,14081,18642,109342,216019,15275,28169,212032,12709,12351,67512,12183,66445,67895,13350,71934
tag_hs_c_2	Triacylglycerol synthesis	45	131	0.343511	0.520459	0	50799,22273,68262,67800,17768,56421,17252,76459,100705,54403,14194,12715,11636,67863,11676,27402,13807,14571,78830,67680,78920,14732,104112,230163,78801,246787,50784,17448,241612,14081,18642,109342,216019,15275,28169,212032,12709,12351,67512,12183,66445,67895,269951,13350,71934
tag_hs_c_250	Triacylglycerol synthesis	45	131	0.343511	0.520459	0	50799,22273,69519,68262,67800,56421,76459,100705,54403,14194,20537,12715,114479,11636,67863,11676,27402,13807,78830,67680,78920,14732,104112,230163,78801,246787,50784,17448,241612,14081,18642,109342,216019,15275,28169,212032,12709,12351,67512,12183,66445,67895,269951,13350,71934
tag_hs_c_103	Triacylglycerol synthesis	46	134	0.343284	0.522264	0	50799,22273,68262,218756,67800,17768,56421,17252,76459,100705,14194,20537,12715,11636,67863,11676,27402,13807,14571,78830,67680,78920,14732,104112,230163,78801,246787,50784,17448,241612,14081,18642,109342,216019,15275,28169,212032,12709,12351,67512,12183,66445,67895,269951,13350,71934
tag_hs_c_228	Triacylglycerol synthesis	46	134	0.343284	0.522264	0	50799,22273,68262,218756,67800,17768,56421,17252,76459,100705,54403,14194,12715,11636,67863,11676,27402,13807,14571,78830,67680,78920,14732,104112,230163,78801,246787,50784,17448,241612,14081,18642,109342,216019,15275,28169,212032,12709,12351,67512,12183,66445,67895,269951,13350,71934
tag_hs_c_237	Triacylglycerol synthesis	46	134	0.343284	0.522264	0	50799,22273,68262,67800,17768,56421,15929,17252,76459,100705,54403,14194,20537,12715,11636,67863,11676,27402,13807,14571,78830,67680,78920,14732,104112,230163,78801,246787,50784,17448,241612,14081,18642,109342,216019,15275,28169,212032,12709,12351,67512,12183,66445,67895,13350,71934
h2o2_m_105	Hydrogen peroxide synthesis	20	58	0.344828	0.532665	0	76459,54403,20544,20537,11676,13807,66171,14120,230163,110208,74419,216019,15275,212032,21881,52815,12351,12183,21351,71934
h2o2_m_24	Hydrogen peroxide synthesis	20	58	0.344828	0.532665	0	76459,54403,20544,20537,11676,13807,66171,14120,230163,110208,74419,216019,15275,212032,21881,52815,12351,12183,21351,71934
h2o2_m_50	Hydrogen peroxide synthesis	20	58	0.344828	0.532665	0	76459,54403,20544,11676,13807,66171,14120,230163,246787,110208,74419,216019,15275,212032,21881,52815,12351,12183,21351,71934
h2o2_m_67	Hydrogen peroxide synthesis	20	58	0.344828	0.532665	0	76459,54403,20544,20537,11676,13807,66171,14120,230163,110208,74419,216019,15275,212032,21881,52815,12351,12183,21351,71934
h2o2_m_71	Hydrogen peroxide synthesis	20	58	0.344828	0.532665	0	76459,54403,20544,20537,11676,13807,66171,14120,230163,110208,74419,216019,15275,212032,21881,52815,12351,12183,21351,71934
h2o2_m_73	Hydrogen peroxide synthesis	20	58	0.344828	0.532665	0	76459,54403,20544,20537,11676,13807,66171,14120,230163,110208,74419,216019,15275,212032,21881,52815,12351,12183,21351,71934
pa_hs_c_95	Phosphatidic acid synthesis	37	108	0.342593	0.53335	0	50799,22273,68262,56421,100705,54403,14194,20537,12715,11636,67863,11676,27402,13807,78830,67680,78920,14732,20505,104112,230163,78801,246787,17448,14081,18642,216019,15275,20531,28169,212032,12709,67512,12183,66445,67895,269951
h2o2_m_10	Hydrogen peroxide synthesis	21	61	0.344262	0.534787	0	69519,76459,54403,20544,20537,11676,13807,66171,14120,230163,110208,74419,216019,15275,212032,21881,52815,12351,12183,21351,71934
h2o2_m_49	Hydrogen peroxide synthesis	21	61	0.344262	0.534787	0	69519,76459,54403,20544,20537,11676,13807,66171,14120,230163,110208,74419,216019,15275,212032,21881,52815,12351,12183,21351,71934
dag_hs_c_223	Diacylglycerol synthesis	38	111	0.342342	0.535122	0	50799,22273,68262,17768,56421,100705,54403,14194,20537,12715,11636,67863,11676,27402,13807,14571,78830,67680,78920,14732,104112,230163,78801,246787,50784,17448,14081,18642,216019,15275,28169,212032,12709,67512,12183,66445,67895,269951
pa_hs_c_35	Phosphatidic acid synthesis	38	111	0.342342	0.535122	0	50799,22273,69519,68262,56421,100705,54403,14194,20537,12715,11636,67863,11676,27402,13807,78830,67680,78920,14732,20505,104112,230163,78801,246787,17448,14081,18642,216019,15275,20531,28169,212032,12709,67512,12183,66445,67895,269951
pa_hs_c_77	Phosphatidic acid synthesis	38	111	0.342342	0.535122	0	50799,22273,69519,68262,56421,100705,54403,14194,20537,12715,11636,67863,11676,27402,13807,78830,67680,78920,14732,20505,104112,230163,78801,246787,17448,14081,18642,216019,15275,20531,28169,212032,12709,67512,12183,66445,67895,269951
pa_hs_c_209	Phosphatidic acid synthesis	39	114	0.342105	0.536858	0	50799,22273,68262,17768,56421,100705,54403,14194,20537,12715,11636,67863,11676,27402,13807,14571,78830,67680,78920,14732,11428,104112,230163,78801,246787,17448,241612,14081,18642,109342,216019,15275,28169,212032,12709,67512,12183,66445,67895
pa_hs_c_225	Phosphatidic acid synthesis	39	114	0.342105	0.536858	0	50799,22273,68262,17768,56421,100705,54403,14194,20537,12715,11636,67863,11676,27402,13807,14571,78830,67680,78920,14732,20505,104112,230163,78801,246787,17448,14081,18642,216019,15275,20531,28169,212032,12709,67512,12183,66445,67895,269951
dag_hs_c_136	Diacylglycerol synthesis	40	117	0.34188	0.53856	0	50799,22273,68262,218756,17768,56421,100705,14194,20537,12715,11636,67863,11676,27402,13807,14571,78830,67680,78920,14732,11428,104112,230163,78801,246787,50784,17448,241612,14081,18642,109342,216019,15275,28169,212032,12709,67512,12183,66445,67895
dag_hs_c_189	Diacylglycerol synthesis	40	117	0.34188	0.53856	0	50799,22273,68262,17768,56421,15929,100705,54403,14194,20537,12715,11636,67863,11676,27402,13807,14571,78830,67680,78920,14732,104112,230163,78801,246787,50784,17448,241612,14081,18642,109342,216019,15275,28169,212032,12709,67512,12183,66445,67895
dag_hs_c_213	Diacylglycerol synthesis	40	117	0.34188	0.53856	0	50799,22273,68262,17768,56421,100705,54403,14194,20537,12715,11636,67863,11676,27402,13807,14571,78830,67680,78920,14732,104112,230163,78801,246787,50784,17448,241612,14081,18642,109342,216019,15275,28169,212032,12709,67512,12183,66445,67895,269951
dag_hs_c_22	Diacylglycerol synthesis	40	117	0.34188	0.53856	0	50799,22273,68262,17768,56421,100705,54403,14194,20537,12715,11636,67863,11676,27402,13807,14571,78830,67680,78920,14732,104112,230163,78801,246787,50784,17448,241612,14081,18642,109342,216019,15275,28169,212032,12709,67512,12183,66445,67895,269951
dag_hs_c_68	Diacylglycerol synthesis	40	117	0.34188	0.53856	0	50799,22273,68262,17768,56421,100705,54403,14194,20537,12715,11636,67863,11676,27402,13807,14571,78830,67680,78920,14732,11428,104112,230163,78801,246787,50784,17448,241612,14081,18642,109342,216019,15275,28169,212032,12709,67512,12183,66445,67895
hdca_c_31	Hexadecanoate synthesis	40	117	0.34188	0.53856	0	50799,22273,218756,56421,15929,110446,100705,78894,67041,14194,20537,12715,114479,11636,67863,11676,27402,13807,78830,67680,78920,224530,11409,230163,78801,246787,17448,241612,14081,18642,109342,216019,15275,212032,12709,78070,12183,57279,66445,67895
pa_hs_c_148	Phosphatidic acid synthesis	40	117	0.34188	0.53856	0	50799,22273,68262,17768,56421,15929,17252,100705,54403,14194,20537,12715,11636,67863,11676,27402,13807,14571,78830,67680,78920,14732,20505,104112,230163,78801,246787,17448,14081,18642,216019,15275,20531,28169,212032,12709,67512,12183,66445,67895
pa_hs_c_47	Phosphatidic acid synthesis	40	117	0.34188	0.53856	0	50799,22273,68262,218756,17768,56421,76459,100705,54403,14194,20537,12715,11636,67863,11676,27402,13807,14571,78830,67680,78920,14732,104112,230163,78801,17448,14081,18642,216019,15275,28169,212032,12709,12351,67512,12183,66445,67895,269951,71934
tag_hs_c_181	Triacylglycerol synthesis	40	117	0.34188	0.53856	0	50799,22273,68262,67800,17768,56421,15929,100705,54403,14194,20537,12715,11636,67863,11676,27402,13807,14571,78830,67680,78920,14732,104112,230163,78801,246787,50784,17448,14081,18642,216019,15275,28169,212032,12709,67512,12183,66445,67895,13350
tag_hs_c_49	Triacylglycerol synthesis	40	117	0.34188	0.53856	0	50799,22273,68262,67800,17768,56421,15929,100705,54403,14194,20537,12715,11636,67863,11676,27402,13807,14571,78830,67680,78920,14732,104112,230163,78801,246787,50784,17448,14081,18642,216019,15275,28169,212032,12709,67512,12183,66445,67895,13350
tag_hs_c_73	Triacylglycerol synthesis	40	117	0.34188	0.53856	0	50799,22273,69519,68262,67800,56421,100705,54403,14194,12715,11636,67863,11676,27402,13807,78830,67680,78920,14732,104112,230163,78801,246787,50784,17448,241612,14081,18642,109342,216019,15275,28169,212032,12709,67512,12183,66445,67895,269951,13350
dag_hs_c_157	Diacylglycerol synthesis	41	120	0.341667	0.540229	0	50799,22273,68262,218756,17768,56421,100705,54403,20544,14194,12715,11636,67863,11676,27402,13807,14571,78830,67680,78920,14732,11428,104112,230163,78801,246787,50784,17448,241612,14081,18642,109342,216019,15275,28169,212032,12709,67512,12183,66445,67895
dag_hs_c_162	Diacylglycerol synthesis	41	120	0.341667	0.540229	0	50799,22273,68262,17768,56421,17252,100705,54403,14194,20537,12715,11636,67863,11676,27402,13807,14571,78830,67680,78920,14732,104112,230163,78801,246787,50784,17448,241612,14081,18642,109342,216019,15275,28169,212032,12709,67512,12183,66445,67895,269951
pa_hs_c_128	Phosphatidic acid synthesis	41	120	0.341667	0.540229	0	50799,22273,68262,17768,56421,100705,54403,20544,14194,20537,12715,11636,67863,11676,27402,13807,14571,78830,67680,78920,14732,11428,104112,230163,78801,246787,20515,17448,241612,14081,18642,109342,216019,15275,28169,212032,12709,67512,12183,66445,67895
pa_hs_c_132	Phosphatidic acid synthesis	41	120	0.341667	0.540229	0	50799,22273,68262,218756,17768,56421,100705,54403,14194,20537,12715,11636,67863,11676,27402,13807,14571,78830,67680,78920,14732,11428,104112,230163,78801,246787,20515,17448,241612,14081,18642,109342,216019,15275,28169,212032,12709,67512,12183,66445,67895
pa_hs_c_218	Phosphatidic acid synthesis	41	120	0.341667	0.540229	0	50799,22273,68262,17768,56421,76459,100705,54403,14194,20537,12715,11636,67863,11676,27402,13807,14571,78830,67680,78920,14732,20505,104112,230163,78801,17448,14081,18642,216019,15275,20531,28169,212032,12709,12351,67512,12183,66445,67895,269951,71934
dag_hs_c_16	Diacylglycerol synthesis	42	123	0.341463	0.541867	0	50799,22273,68262,218756,17768,56421,17252,100705,14194,20537,12715,114479,11636,67863,11676,27402,13807,14571,78830,67680,78920,14732,104112,230163,78801,246787,50784,17448,241612,14081,18642,109342,216019,15275,28169,212032,12709,67512,12183,66445,67895,269951
dag_hs_c_227	Diacylglycerol synthesis	42	123	0.341463	0.541867	0	50799,22273,68262,17768,56421,76459,100705,14194,20537,12715,11636,67863,11676,27402,13807,14571,78830,67680,78920,14732,104112,230163,78801,246787,50784,17448,241612,14081,18642,109342,216019,15275,28169,212032,12709,12351,67512,12183,66445,67895,269951,71934
dag_hs_c_59	Diacylglycerol synthesis	42	123	0.341463	0.541867	0	50799,22273,68262,17768,56421,76459,100705,54403,14194,12715,11636,67863,11676,27402,13807,14571,78830,67680,78920,14732,104112,230163,78801,246787,50784,17448,241612,14081,18642,109342,216019,15275,28169,212032,12709,12351,67512,12183,66445,67895,269951,71934
dag_hs_c_83	Diacylglycerol synthesis	42	123	0.341463	0.541867	0	50799,22273,68262,17768,56421,15929,76459,100705,14194,20537,12715,11636,67863,11676,27402,13807,14571,78830,67680,78920,14732,104112,230163,78801,246787,50784,17448,241612,14081,18642,109342,216019,15275,28169,212032,12709,12351,67512,12183,66445,67895,71934
hdca_c_33	Hexadecanoate synthesis	42	123	0.341463	0.541867	0	50799,22273,56421,15929,76459,110446,100705,78894,67041,14194,20537,12715,114479,11636,67863,11676,27402,13807,78830,67680,78920,224530,11409,230163,78801,246787,17448,241612,14081,18642,109342,216019,15275,212032,12709,12351,78070,12183,57279,66445,67895,71934
hdca_c_39	Hexadecanoate synthesis	42	123	0.341463	0.541867	0	50799,22273,56421,15929,76459,110446,100705,78894,67041,14194,20537,12715,114479,11636,67863,11676,27402,13807,78830,67680,78920,224530,11409,230163,78801,246787,17448,241612,14081,18642,109342,216019,15275,212032,12709,12351,78070,12183,57279,66445,67895,71934
pa_hs_c_117	Phosphatidic acid synthesis	42	123	0.341463	0.541867	0	50799,22273,68262,17768,56421,76459,100705,14194,20537,12715,114479,11636,67863,11676,27402,13807,14571,78830,67680,78920,14732,104112,230163,78801,246787,17448,241612,14081,18642,109342,216019,15275,28169,212032,12709,12351,67512,12183,66445,67895,269951,71934
pa_hs_c_145	Phosphatidic acid synthesis	42	123	0.341463	0.541867	0	50799,22273,68262,17768,56421,76459,100705,14194,20537,12715,11636,67863,11676,27402,13807,14571,78830,67680,78920,14732,11428,104112,230163,78801,246787,319848,17448,241612,14081,18642,109342,216019,15275,28169,212032,12709,12351,67512,12183,66445,67895,71934
pa_hs_c_235	Phosphatidic acid synthesis	42	123	0.341463	0.541867	0	50799,22273,68262,17768,56421,76459,100705,14194,20537,12715,11636,67863,11676,27402,13807,14571,78830,67680,78920,14732,104112,230163,78801,246787,20515,17448,241612,14081,18642,109342,216019,15275,28169,212032,12709,12351,67512,12183,66445,67895,269951,71934
pa_hs_c_55	Phosphatidic acid synthesis	42	123	0.341463	0.541867	0	50799,22273,68262,17768,56421,76459,100705,14194,20537,12715,11636,67863,11676,27402,13807,14571,78830,67680,78920,14732,104112,230163,78801,246787,20515,17448,241612,14081,18642,109342,216019,15275,28169,212032,12709,12351,67512,12183,66445,67895,269951,71934
tag_hs_c_122	Triacylglycerol synthesis	42	123	0.341463	0.541867	0	50799,22273,68262,67800,17768,56421,76459,100705,14194,20537,12715,11636,67863,11676,27402,13807,14571,78830,67680,78920,14732,11428,104112,230163,78801,246787,50784,17448,14081,18642,216019,15275,28169,212032,12709,12351,67512,12183,66445,67895,13350,71934
tag_hs_c_150	Triacylglycerol synthesis	42	123	0.341463	0.541867	0	50799,22273,68262,67800,17768,56421,76459,100705,54403,14194,20537,12715,11636,67863,11676,27402,13807,14571,78830,67680,78920,14732,11428,104112,230163,78801,50784,17448,14081,18642,216019,15275,28169,212032,12709,12351,67512,12183,66445,67895,13350,71934
tag_hs_c_240	Triacylglycerol synthesis	42	123	0.341463	0.541867	0	50799,22273,68262,67800,17768,56421,76459,100705,54403,14194,20537,12715,11636,67863,11676,27402,13807,14571,78830,67680,78920,14732,104112,230163,78801,50784,17448,14081,18642,216019,15275,28169,212032,12709,12351,67512,12183,66445,67895,269951,13350,71934
tag_hs_c_95	Triacylglycerol synthesis	42	123	0.341463	0.541867	0	50799,22273,68262,218756,67800,17768,56421,17252,100705,20544,14194,20537,12715,11636,67863,11676,27402,13807,14571,78830,67680,78920,14732,104112,230163,78801,246787,50784,17448,14081,18642,216019,15275,28169,212032,12709,67512,12183,66445,67895,269951,13350
dag_hs_c_103	Diacylglycerol synthesis	43	126	0.34127	0.543477	0	50799,22273,68262,218756,17768,56421,17252,100705,20544,14194,20537,12715,114479,11636,67863,11676,27402,13807,14571,78830,67680,78920,14732,104112,230163,78801,246787,50784,17448,241612,14081,18642,109342,216019,15275,28169,212032,12709,67512,12183,66445,67895,269951
dag_hs_c_119	Diacylglycerol synthesis	43	126	0.34127	0.543477	0	50799,22273,68262,17768,56421,76459,100705,54403,14194,20537,12715,11636,67863,11676,27402,13807,14571,78830,67680,78920,14732,104112,230163,78801,246787,50784,17448,241612,14081,18642,109342,216019,15275,28169,212032,12709,12351,67512,12183,66445,67895,269951,71934
dag_hs_c_149	Diacylglycerol synthesis	43	126	0.34127	0.543477	0	50799,22273,68262,218756,17768,56421,76459,100705,54403,14194,12715,11636,67863,11676,27402,13807,14571,78830,67680,78920,14732,104112,230163,78801,246787,50784,17448,241612,14081,18642,109342,216019,15275,28169,212032,12709,12351,67512,12183,66445,67895,269951,71934
dag_hs_c_166	Diacylglycerol synthesis	43	126	0.34127	0.543477	0	50799,22273,68262,17768,56421,76459,100705,54403,14194,20537,12715,11636,67863,11676,27402,13807,14571,78830,67680,78920,14732,11428,104112,230163,78801,246787,50784,17448,241612,14081,18642,109342,216019,15275,28169,212032,12709,12351,67512,12183,66445,67895,71934
dag_hs_c_54	Diacylglycerol synthesis	43	126	0.34127	0.543477	0	50799,22273,68262,218756,17768,56421,15929,76459,100705,54403,14194,12715,11636,67863,11676,27402,13807,14571,78830,67680,78920,14732,104112,230163,78801,246787,50784,17448,241612,14081,18642,109342,216019,15275,28169,212032,12709,12351,67512,12183,66445,67895,71934
dag_hs_c_70	Diacylglycerol synthesis	43	126	0.34127	0.543477	0	50799,22273,68262,17768,56421,15929,76459,100705,54403,14194,20537,12715,11636,67863,11676,27402,13807,14571,78830,67680,78920,14732,104112,230163,78801,246787,50784,17448,241612,14081,18642,109342,216019,15275,28169,212032,12709,12351,67512,12183,66445,67895,71934
hdca_c_77	Hexadecanoate synthesis	43	126	0.34127	0.543477	0	50799,22273,56421,15929,76459,110446,100705,54403,78894,67041,14194,20537,12715,114479,11636,67863,11676,27402,13807,78830,67680,78920,224530,11409,230163,78801,246787,17448,241612,14081,18642,109342,216019,15275,212032,12709,12351,78070,12183,57279,66445,67895,71934
pa_hs_c_100	Phosphatidic acid synthesis	43	126	0.34127	0.543477	0	50799,22273,68262,17768,56421,15929,76459,100705,54403,14194,12715,11636,67863,11676,27402,13807,14571,78830,67680,78920,14732,20505,104112,230163,78801,246787,17448,241612,14081,18642,109342,216019,15275,20531,28169,212032,12709,12351,67512,12183,66445,67895,71934
pa_hs_c_196	Phosphatidic acid synthesis	43	126	0.34127	0.543477	0	50799,22273,68262,17768,56421,76459,100705,54403,14194,20537,12715,11636,67863,11676,27402,13807,14571,78830,67680,78920,14732,104112,230163,78801,246787,20515,17448,241612,14081,18642,109342,216019,15275,28169,212032,12709,12351,67512,12183,66445,67895,269951,71934
tag_hs_c_106	Triacylglycerol synthesis	43	126	0.34127	0.543477	0	50799,22273,68262,67800,17768,56421,15929,76459,100705,14194,20537,12715,114479,11636,67863,11676,27402,13807,14571,78830,67680,78920,14732,104112,230163,78801,246787,50784,17448,14081,18642,216019,15275,28169,212032,12709,12351,67512,12183,66445,67895,13350,71934
tag_hs_c_154	Triacylglycerol synthesis	43	126	0.34127	0.543477	0	50799,22273,68262,67800,56421,76459,100705,54403,14194,20537,12715,11636,67863,11676,27402,13807,78830,67680,78920,14732,104112,230163,78801,246787,50784,17448,241612,14081,18642,109342,216019,15275,28169,212032,12709,12351,67512,12183,66445,67895,269951,13350,71934
tag_hs_c_223	Triacylglycerol synthesis	43	126	0.34127	0.543477	0	50799,22273,68262,67800,17768,56421,17252,76459,100705,54403,14194,20537,12715,11636,67863,11676,27402,13807,14571,78830,67680,78920,14732,104112,230163,78801,50784,17448,14081,18642,216019,15275,28169,212032,12709,12351,67512,12183,66445,67895,269951,13350,71934
tag_hs_c_235	Triacylglycerol synthesis	43	126	0.34127	0.543477	0	50799,22273,68262,67800,17768,56421,76459,100705,14194,12715,11636,67863,11676,27402,13807,14571,78830,67680,78920,14732,104112,230163,78801,246787,50784,17448,241612,14081,18642,109342,216019,15275,28169,212032,12709,12351,67512,12183,66445,67895,269951,13350,71934
tag_hs_c_242	Triacylglycerol synthesis	43	126	0.34127	0.543477	0	50799,22273,68262,67800,17768,56421,76459,100705,14194,12715,11636,67863,11676,27402,13807,14571,78830,67680,78920,14732,104112,230163,78801,246787,50784,17448,241612,14081,18642,109342,216019,15275,28169,212032,12709,12351,67512,12183,66445,67895,269951,13350,71934
tag_hs_c_247	Triacylglycerol synthesis	43	126	0.34127	0.543477	0	50799,22273,68262,67800,17768,56421,17252,100705,54403,14194,12715,11636,67863,11676,27402,13807,14571,78830,67680,78920,14732,104112,230163,78801,246787,50784,17448,241612,14081,18642,109342,216019,15275,28169,212032,12709,67512,12183,16956,66445,67895,269951,13350
tag_hs_c_90	Triacylglycerol synthesis	43	126	0.34127	0.543477	0	50799,22273,68262,67800,17768,56421,76459,100705,14194,20537,12715,114479,11636,67863,11676,27402,13807,14571,78830,67680,78920,14732,104112,230163,78801,246787,50784,17448,14081,18642,216019,15275,28169,212032,12709,12351,67512,12183,66445,67895,269951,13350,71934
dag_hs_c_1	Diacylglycerol synthesis	44	129	0.341085	0.545058	0	50799,22273,68262,17768,56421,17252,76459,100705,14194,20537,12715,114479,11636,67863,11676,27402,13807,14571,78830,67680,78920,14732,104112,230163,78801,246787,50784,17448,241612,14081,18642,109342,216019,15275,28169,212032,12709,12351,67512,12183,66445,67895,269951,71934
dag_hs_c_181	Diacylglycerol synthesis	44	129	0.341085	0.545058	0	50799,22273,68262,17768,56421,17252,76459,100705,54403,14194,20537,12715,11636,67863,11676,27402,13807,14571,78830,67680,78920,14732,104112,230163,78801,246787,50784,17448,241612,14081,18642,109342,216019,15275,28169,212032,12709,12351,67512,12183,66445,67895,269951,71934
dag_hs_c_225	Diacylglycerol synthesis	44	129	0.341085	0.545058	0	50799,22273,68262,17768,56421,17252,76459,100705,54403,14194,20537,12715,11636,67863,11676,27402,13807,14571,78830,67680,78920,14732,104112,230163,78801,246787,50784,17448,241612,14081,18642,109342,216019,15275,28169,212032,12709,12351,67512,12183,66445,67895,269951,71934
dag_hs_c_69	Diacylglycerol synthesis	44	129	0.341085	0.545058	0	50799,22273,68262,17768,56421,17252,76459,100705,54403,14194,20537,12715,11636,67863,11676,27402,13807,14571,78830,67680,78920,14732,104112,230163,78801,246787,50784,17448,241612,14081,18642,109342,216019,15275,28169,212032,12709,12351,67512,12183,66445,67895,269951,71934
pa_hs_c_149	Phosphatidic acid synthesis	44	129	0.341085	0.545058	0	50799,22273,68262,17768,56421,17252,76459,100705,54403,14194,20537,12715,11636,67863,11676,27402,13807,14571,78830,67680,78920,14732,104112,230163,78801,246787,20515,17448,241612,14081,18642,109342,216019,15275,28169,212032,12709,12351,67512,12183,66445,67895,269951,71934
pa_hs_c_178	Phosphatidic acid synthesis	44	129	0.341085	0.545058	0	50799,22273,68262,17768,56421,15929,76459,100705,54403,14194,20537,12715,114479,11636,67863,11676,27402,13807,14571,78830,67680,78920,14732,104112,230163,78801,246787,20515,17448,241612,14081,18642,109342,216019,15275,28169,212032,12709,12351,67512,12183,66445,67895,71934
pa_hs_c_43	Phosphatidic acid synthesis	44	129	0.341085	0.545058	0	50799,22273,68262,17768,56421,17252,76459,100705,14194,20537,12715,11636,67863,11676,27402,13807,14571,78830,67680,78920,14732,104112,230163,107605,78801,246787,20515,17448,241612,14081,18642,109342,216019,15275,28169,212032,12709,12351,67512,12183,66445,67895,269951,71934
tag_hs_c_114	Triacylglycerol synthesis	44	129	0.341085	0.545058	0	50799,22273,68262,67800,17768,56421,15929,17252,76459,100705,14194,20537,12715,114479,11636,67863,11676,27402,13807,14571,78830,67680,78920,14732,104112,230163,78801,246787,50784,17448,14081,18642,216019,15275,28169,212032,12709,12351,67512,12183,66445,67895,13350,71934
tag_hs_c_210	Triacylglycerol synthesis	44	129	0.341085	0.545058	0	50799,22273,68262,67800,17768,56421,15929,76459,100705,14194,20537,12715,11636,67863,11676,27402,13807,14571,78830,67680,78920,14732,104112,230163,78801,246787,50784,17448,241612,14081,18642,109342,216019,15275,28169,212032,12709,12351,67512,12183,66445,67895,13350,71934
tag_hs_c_226	Triacylglycerol synthesis	44	129	0.341085	0.545058	0	50799,22273,69519,68262,67800,56421,76459,100705,54403,14194,20537,12715,11636,67863,11676,27402,13807,78830,67680,78920,14732,104112,230163,78801,246787,50784,17448,241612,14081,18642,109342,216019,15275,28169,212032,12709,12351,67512,12183,66445,67895,269951,13350,71934
tag_hs_c_28	Triacylglycerol synthesis	44	129	0.341085	0.545058	0	50799,22273,68262,67800,17768,56421,76459,100705,14194,12715,11636,67863,11676,27402,13807,14571,78830,67680,78920,14732,11428,104112,230163,78801,246787,50784,17448,241612,14081,18642,109342,216019,15275,28169,212032,12709,12351,67512,12183,16956,66445,67895,13350,71934
tag_hs_c_29	Triacylglycerol synthesis	44	129	0.341085	0.545058	0	50799,22273,68262,67800,17768,56421,76459,100705,54403,14194,12715,11636,67863,11676,27402,13807,14571,78830,67680,78920,14732,104112,230163,78801,246787,50784,17448,241612,14081,18642,109342,216019,15275,28169,212032,12709,12351,67512,12183,66445,67895,269951,13350,71934
tag_hs_c_42	Triacylglycerol synthesis	44	129	0.341085	0.545058	0	50799,22273,68262,67800,17768,56421,76459,100705,14194,12715,11636,67863,11676,27402,13807,14571,78830,67680,78920,14732,11428,104112,230163,78801,246787,50784,17448,241612,14081,18642,109342,216019,15275,28169,212032,12709,12351,67512,12183,16956,66445,67895,13350,71934
dag_hs_c_226	Diacylglycerol synthesis	45	132	0.340909	0.546614	0	50799,22273,68262,17768,56421,17252,76459,100705,54403,14194,20537,12715,11636,67863,11676,27402,13807,14571,78830,67680,78920,14732,104112,230163,107605,78801,246787,50784,17448,241612,14081,18642,109342,216019,15275,28169,212032,12709,12351,67512,12183,66445,67895,269951,71934
pa_hs_c_101	Phosphatidic acid synthesis	45	132	0.340909	0.546614	0	50799,22273,68262,17768,56421,76459,100705,54403,20544,14194,20537,12715,114479,11636,67863,11676,27402,13807,14571,78830,67680,78920,14732,104112,230163,78801,246787,20515,17448,241612,14081,18642,109342,216019,15275,28169,212032,12709,12351,67512,12183,66445,67895,269951,71934
pa_hs_c_16	Phosphatidic acid synthesis	45	132	0.340909	0.546614	0	50799,22273,68262,17768,56421,17252,76459,100705,14194,20537,12715,11636,67863,11676,27402,13807,14571,78830,67680,78920,14732,20505,104112,230163,107605,78801,246787,17448,241612,14081,18642,109342,216019,15275,20531,28169,212032,12709,12351,67512,12183,66445,67895,269951,71934
pa_hs_c_236	Phosphatidic acid synthesis	45	132	0.340909	0.546614	0	50799,22273,68262,17768,56421,17252,76459,100705,54403,14194,20537,12715,11636,67863,11676,27402,13807,14571,78830,67680,78920,14732,11428,104112,230163,107605,78801,246787,20515,17448,241612,14081,18642,109342,216019,15275,28169,212032,12709,12351,67512,12183,66445,67895,71934
pa_hs_c_45	Phosphatidic acid synthesis	45	132	0.340909	0.546614	0	50799,22273,68262,17768,56421,17252,76459,100705,54403,14194,12715,11636,67863,11676,27402,13807,14571,78830,67680,78920,14732,20505,104112,230163,78801,246787,20515,17448,241612,14081,18642,109342,216019,15275,20531,28169,212032,12709,12351,67512,12183,66445,67895,269951,71934
tag_hs_c_17	Triacylglycerol synthesis	45	132	0.340909	0.546614	0	50799,22273,68262,67800,17768,56421,17252,76459,100705,54403,14194,12715,11636,67863,11676,27402,13807,14571,78830,67680,78920,14732,11428,104112,230163,78801,246787,50784,17448,241612,14081,18642,109342,216019,15275,28169,212032,12709,12351,67512,12183,66445,67895,13350,71934
tag_hs_c_212	Triacylglycerol synthesis	45	132	0.340909	0.546614	0	50799,22273,68262,67800,17768,56421,17252,76459,100705,14194,12715,11636,67863,11676,27402,13807,14571,78830,67680,78920,14732,104112,230163,78801,246787,50784,17448,241612,14081,18642,109342,216019,15275,28169,212032,12709,12351,67512,12183,16956,66445,67895,269951,13350,71934
tag_hs_c_59	Triacylglycerol synthesis	45	132	0.340909	0.546614	0	50799,22273,69519,68262,218756,67800,56421,76459,100705,20544,14194,20537,12715,11636,67863,11676,27402,13807,78830,67680,78920,14732,104112,230163,78801,246787,50784,17448,241612,14081,18642,109342,216019,15275,28169,212032,12709,12351,67512,12183,66445,67895,269951,13350,71934
pa_hs_c_238	Phosphatidic acid synthesis	46	135	0.340741	0.548145	0	50799,22273,68262,17768,56421,17252,76459,100705,14194,20537,12715,11636,67863,11676,27402,13807,14571,78830,67680,78920,14732,11428,20505,104112,230163,107605,78801,246787,20515,17448,241612,14081,18642,109342,216019,15275,20531,28169,212032,12709,12351,67512,12183,66445,67895,71934
tag_hs_c_170	Triacylglycerol synthesis	46	135	0.340741	0.548145	0	50799,22273,68262,67800,17768,56421,17252,76459,100705,14194,20537,12715,11636,67863,11676,27402,13807,14571,78830,67680,78920,14732,104112,230163,107605,78801,246787,50784,17448,241612,14081,18642,109342,216019,15275,28169,212032,12709,12351,67512,12183,66445,67895,269951,13350,71934
pail_hs_c_123	Phosphatidylinositol synthesis	47	138	0.34058	0.549652	0	50799,22273,68262,17768,56421,76459,110446,100705,78894,67041,20544,14194,12715,11636,67863,11676,27402,13807,14571,78830,67680,78920,14732,224530,20505,230163,78801,246787,114663,17448,241612,14081,18642,109342,216019,15275,20531,28169,212032,12709,12351,67512,12183,66445,67895,269951,71934
tag_hs_c_12	Triacylglycerol synthesis	47	138	0.34058	0.549652	0	50799,22273,68262,218756,67800,17768,56421,17252,76459,100705,54403,14194,12715,11636,67863,11676,27402,13807,14571,78830,67680,78920,14732,11428,104112,230163,107605,78801,246787,50784,17448,241612,14081,18642,109342,216019,15275,28169,212032,12709,12351,67512,12183,66445,67895,13350,71934
tag_hs_c_236	Triacylglycerol synthesis	47	138	0.34058	0.549652	0	50799,22273,68262,67800,17768,56421,17252,76459,100705,54403,14194,20537,12715,11636,67863,11676,27402,13807,14571,78830,67680,78920,14732,11428,104112,230163,107605,78801,246787,50784,17448,241612,14081,18642,109342,216019,15275,28169,212032,12709,12351,67512,12183,66445,67895,13350,71934
pail_hs_c_16	Phosphatidylinositol synthesis	48	141	0.340426	0.551137	0	50799,22273,68262,17768,56421,76459,110446,100705,54403,78894,67041,14194,20537,12715,114479,11636,67863,11676,27402,13807,14571,78830,67680,78920,14732,224530,230163,78801,246787,114663,20515,17448,241612,14081,18642,109342,216019,15275,28169,212032,12709,12351,67512,12183,66445,67895,269951,71934
pa_hs_c_42	Phosphatidic acid synthesis	37	109	0.33945	0.561732	0	50799,22273,68262,17768,56421,100705,54403,14194,20537,12715,11636,67863,11676,27402,13807,14571,78830,67680,78920,14732,104112,230163,78801,20515,17448,14081,18642,216019,15275,28169,212032,12709,67512,12183,66445,67895,269951
pa_hs_c_126	Phosphatidic acid synthesis	38	112	0.339286	0.563137	0	50799,22273,68262,218756,17768,56421,100705,14194,20537,12715,114479,11636,67863,11676,27402,13807,14571,78830,67680,78920,14732,104112,230163,78801,20515,17448,14081,18642,216019,15275,28169,212032,12709,67512,12183,66445,67895,269951
pa_hs_c_127	Phosphatidic acid synthesis	38	112	0.339286	0.563137	0	50799,22273,68262,17768,56421,100705,54403,14194,20537,12715,11636,67863,11676,27402,13807,14571,78830,67680,78920,14732,104112,230163,78801,246787,20515,17448,14081,18642,216019,15275,28169,212032,12709,67512,12183,66445,67895,269951
hdca_c_130	Hexadecanoate synthesis	39	115	0.33913	0.56452	0	50799,22273,218756,56421,15929,110446,100705,54403,78894,67041,14194,12715,11636,67863,11676,27402,13807,78830,67680,78920,224530,11409,230163,78801,246787,17448,241612,14081,18642,109342,216019,15275,212032,12709,78070,12183,57279,66445,67895
hdca_c_157	Hexadecanoate synthesis	39	115	0.33913	0.56452	0	50799,22273,56421,15929,110446,100705,54403,78894,67041,14194,20537,12715,11636,67863,11676,27402,13807,78830,67680,78920,224530,11409,230163,78801,246787,17448,241612,14081,18642,109342,216019,15275,212032,12709,78070,12183,57279,66445,67895
hdca_c_210	Hexadecanoate synthesis	39	115	0.33913	0.56452	0	50799,22273,218756,56421,15929,110446,100705,78894,67041,14194,20537,12715,11636,67863,11676,27402,13807,78830,67680,78920,224530,11409,230163,78801,246787,17448,241612,14081,18642,109342,216019,15275,212032,12709,78070,12183,57279,66445,67895
hdca_c_94	Hexadecanoate synthesis	39	115	0.33913	0.56452	0	50799,22273,56421,15929,110446,100705,54403,78894,67041,14194,20537,12715,11636,67863,11676,27402,13807,78830,67680,78920,224530,11409,230163,78801,246787,17448,241612,14081,18642,109342,216019,15275,212032,12709,78070,12183,57279,66445,67895
pa_hs_c_118	Phosphatidic acid synthesis	39	115	0.33913	0.56452	0	50799,22273,68262,17768,56421,17252,100705,54403,14194,20537,12715,11636,67863,11676,27402,13807,14571,78830,67680,78920,14732,20505,104112,230163,78801,17448,14081,18642,216019,15275,20531,28169,212032,12709,67512,12183,66445,67895,269951
pa_hs_c_136	Phosphatidic acid synthesis	39	115	0.33913	0.56452	0	50799,22273,68262,17768,56421,100705,54403,14194,20537,12715,11636,67863,11676,27402,13807,14571,78830,67680,78920,14732,20505,104112,230163,78801,246787,17448,14081,18642,216019,15275,20531,28169,212032,12709,67512,12183,66445,67895,269951
pa_hs_c_170	Phosphatidic acid synthesis	39	115	0.33913	0.56452	0	50799,22273,68262,218756,17768,56421,100705,54403,14194,20537,12715,11636,67863,11676,27402,13807,14571,78830,67680,78920,14732,11428,20505,104112,230163,78801,17448,14081,18642,216019,15275,20531,28169,212032,12709,67512,12183,66445,67895
pa_hs_c_185	Phosphatidic acid synthesis	39	115	0.33913	0.56452	0	50799,22273,68262,17768,56421,100705,54403,14194,20537,12715,11636,67863,11676,27402,13807,14571,78830,67680,78920,14732,20505,104112,230163,78801,20515,17448,14081,18642,216019,15275,20531,28169,212032,12709,67512,12183,66445,67895,269951
pa_hs_c_191	Phosphatidic acid synthesis	39	115	0.33913	0.56452	0	50799,22273,68262,17768,56421,100705,54403,14194,20537,12715,11636,67863,11676,27402,13807,14571,78830,67680,78920,14732,104112,230163,78801,246787,17448,241612,14081,18642,109342,216019,15275,28169,212032,12709,67512,12183,66445,67895,269951
pa_hs_c_71	Phosphatidic acid synthesis	39	115	0.33913	0.56452	0	50799,22273,68262,17768,56421,100705,54403,14194,12715,11636,67863,11676,27402,13807,14571,78830,67680,78920,14732,104112,230163,78801,246787,20515,17448,241612,14081,18642,109342,216019,15275,28169,212032,12709,67512,12183,66445,67895,269951
tag_hs_c_34	Triacylglycerol synthesis	39	115	0.33913	0.56452	0	50799,22273,68262,67800,17768,56421,100705,54403,14194,20537,12715,11636,67863,11676,27402,13807,14571,78830,67680,78920,14732,11428,104112,230163,78801,50784,17448,14081,18642,216019,15275,28169,212032,12709,67512,12183,66445,67895,13350
dag_hs_c_120	Diacylglycerol synthesis	40	118	0.338983	0.565883	0	50799,22273,68262,218756,17768,56421,100705,14194,20537,12715,11636,67863,11676,27402,13807,14571,78830,67680,78920,14732,11428,104112,230163,78801,246787,50784,17448,241612,14081,18642,109342,216019,15275,28169,212032,12709,67512,12183,66445,67895
dag_hs_c_184	Diacylglycerol synthesis	40	118	0.338983	0.565883	0	50799,22273,68262,17768,56421,100705,54403,14194,20537,12715,11636,67863,11676,27402,13807,14571,78830,67680,78920,14732,11428,104112,230163,78801,246787,50784,17448,241612,14081,18642,109342,216019,15275,28169,212032,12709,67512,12183,66445,67895
dag_hs_c_203	Diacylglycerol synthesis	40	118	0.338983	0.565883	0	50799,22273,68262,17768,56421,100705,54403,14194,20537,12715,11636,67863,11676,27402,13807,14571,78830,67680,78920,14732,104112,230163,78801,246787,50784,17448,241612,14081,18642,109342,216019,15275,28169,212032,12709,67512,12183,66445,67895,269951
dag_hs_c_208	Diacylglycerol synthesis	40	118	0.338983	0.565883	0	50799,22273,68262,17768,56421,100705,54403,14194,20537,12715,11636,67863,11676,27402,13807,14571,78830,67680,78920,14732,104112,230163,78801,246787,50784,17448,241612,14081,18642,109342,216019,15275,28169,212032,12709,67512,12183,66445,67895,269951
dag_hs_c_38	Diacylglycerol synthesis	40	118	0.338983	0.565883	0	50799,22273,68262,17768,56421,100705,54403,14194,20537,12715,11636,67863,11676,27402,13807,14571,78830,67680,78920,14732,104112,230163,78801,246787,50784,17448,241612,14081,18642,109342,216019,15275,28169,212032,12709,67512,12183,66445,67895,269951
tag_hs_c_189	Triacylglycerol synthesis	40	118	0.338983	0.565883	0	50799,22273,68262,67800,17768,56421,100705,54403,14194,20537,12715,11636,67863,11676,27402,13807,14571,78830,67680,78920,14732,11428,104112,230163,78801,246787,50784,17448,14081,18642,216019,15275,28169,212032,12709,67512,12183,66445,67895,13350
tag_hs_c_257	Triacylglycerol synthesis	40	118	0.338983	0.565883	0	50799,22273,68262,67800,17768,56421,100705,54403,14194,20537,12715,11636,67863,11676,27402,13807,14571,78830,67680,78920,14732,11428,104112,230163,78801,246787,50784,17448,14081,18642,216019,15275,28169,212032,12709,67512,12183,66445,67895,13350
dag_hs_c_2	Diacylglycerol synthesis	41	121	0.338843	0.567226	0	50799,22273,68262,218756,17768,56421,76459,100705,54403,14194,20537,12715,11636,67863,11676,27402,13807,14571,78830,67680,78920,14732,11428,104112,230163,78801,50784,17448,14081,18642,216019,15275,28169,212032,12709,12351,67512,12183,66445,67895,71934
dag_hs_c_215	Diacylglycerol synthesis	41	121	0.338843	0.567226	0	50799,22273,68262,218756,17768,56421,100705,20544,14194,20537,12715,11636,67863,11676,27402,13807,14571,78830,67680,78920,14732,104112,230163,78801,246787,50784,17448,241612,14081,18642,109342,216019,15275,28169,212032,12709,67512,12183,66445,67895,269951
pa_hs_c_107	Phosphatidic acid synthesis	41	121	0.338843	0.567226	0	50799,22273,68262,17768,56421,17252,100705,54403,14194,20537,12715,11636,67863,11676,27402,13807,14571,78830,67680,78920,14732,104112,230163,107605,78801,246787,17448,241612,14081,18642,109342,216019,15275,28169,212032,12709,67512,12183,66445,67895,269951
tag_hs_c_151	Triacylglycerol synthesis	41	121	0.338843	0.567226	0	50799,22273,68262,67800,56421,76459,100705,54403,14194,20537,12715,114479,11636,67863,11676,27402,13807,78830,67680,78920,14732,104112,230163,78801,50784,17448,14081,18642,216019,15275,28169,212032,12709,12351,67512,12183,66445,67895,269951,13350,71934
tag_hs_c_93	Triacylglycerol synthesis	41	121	0.338843	0.567226	0	50799,22273,68262,218756,67800,17768,56421,15929,100705,54403,20544,14194,20537,12715,11636,67863,11676,27402,13807,14571,78830,67680,78920,14732,104112,230163,78801,50784,17448,14081,18642,216019,15275,28169,212032,12709,67512,12183,66445,67895,13350
dag_hs_c_109	Diacylglycerol synthesis	42	124	0.33871	0.568551	0	50799,22273,68262,17768,56421,76459,100705,14194,20537,12715,11636,67863,11676,27402,13807,14571,78830,67680,78920,14732,104112,230163,78801,246787,50784,17448,241612,14081,18642,109342,216019,15275,28169,212032,12709,12351,67512,12183,66445,67895,269951,71934
dag_hs_c_163	Diacylglycerol synthesis	42	124	0.33871	0.568551	0	50799,22273,68262,17768,56421,17252,100705,54403,14194,20537,12715,114479,11636,67863,11676,27402,13807,14571,78830,67680,78920,14732,104112,230163,78801,246787,50784,17448,241612,14081,18642,109342,216019,15275,28169,212032,12709,67512,12183,66445,67895,269951
dag_hs_c_185	Diacylglycerol synthesis	42	124	0.33871	0.568551	0	50799,22273,68262,17768,56421,76459,100705,14194,20537,12715,11636,67863,11676,27402,13807,14571,78830,67680,78920,14732,11428,104112,230163,78801,246787,50784,17448,241612,14081,18642,109342,216019,15275,28169,212032,12709,12351,67512,12183,66445,67895,71934
dag_hs_c_224	Diacylglycerol synthesis	42	124	0.33871	0.568551	0	50799,22273,68262,17768,56421,76459,100705,14194,20537,12715,11636,67863,11676,27402,13807,14571,78830,67680,78920,14732,104112,230163,78801,246787,50784,17448,241612,14081,18642,109342,216019,15275,28169,212032,12709,12351,67512,12183,66445,67895,269951,71934
dag_hs_c_5	Diacylglycerol synthesis	42	124	0.33871	0.568551	0	50799,22273,68262,17768,56421,76459,100705,54403,14194,12715,11636,67863,11676,27402,13807,14571,78830,67680,78920,14732,104112,230163,78801,246787,50784,17448,241612,14081,18642,109342,216019,15275,28169,212032,12709,12351,67512,12183,66445,67895,269951,71934
dag_hs_c_78	Diacylglycerol synthesis	42	124	0.33871	0.568551	0	50799,22273,68262,17768,56421,76459,100705,14194,20537,12715,11636,67863,11676,27402,13807,14571,78830,67680,78920,14732,104112,230163,78801,246787,50784,17448,241612,14081,18642,109342,216019,15275,28169,212032,12709,12351,67512,12183,66445,67895,269951,71934
hdca_c_122	Hexadecanoate synthesis	42	124	0.33871	0.568551	0	50799,22273,56421,15929,76459,110446,100705,54403,78894,67041,14194,20537,12715,11636,67863,11676,27402,13807,78830,67680,78920,224530,11409,230163,78801,246787,17448,241612,14081,18642,109342,216019,15275,212032,12709,12351,78070,12183,57279,66445,67895,71934
hdca_c_127	Hexadecanoate synthesis	42	124	0.33871	0.568551	0	50799,22273,56421,15929,76459,110446,100705,54403,78894,67041,14194,20537,12715,11636,67863,11676,27402,13807,78830,67680,78920,224530,11409,230163,78801,246787,17448,241612,14081,18642,109342,216019,15275,212032,12709,12351,78070,12183,57279,66445,67895,71934
hdca_c_178	Hexadecanoate synthesis	42	124	0.33871	0.568551	0	50799,22273,56421,15929,76459,110446,100705,78894,67041,14194,20537,12715,114479,11636,67863,11676,27402,13807,78830,67680,78920,224530,11409,230163,78801,246787,17448,241612,14081,18642,109342,216019,15275,212032,12709,12351,78070,12183,57279,66445,67895,71934
hdca_c_40	Hexadecanoate synthesis	42	124	0.33871	0.568551	0	50799,22273,56421,15929,76459,110446,100705,54403,78894,67041,14194,20537,12715,11636,67863,11676,27402,13807,78830,67680,78920,224530,11409,230163,78801,246787,17448,241612,14081,18642,109342,216019,15275,212032,12709,12351,78070,12183,57279,66445,67895,71934
hdca_c_51	Hexadecanoate synthesis	42	124	0.33871	0.568551	0	50799,22273,218756,56421,15929,76459,110446,100705,54403,78894,67041,14194,12715,11636,67863,11676,27402,13807,78830,67680,78920,224530,11409,230163,78801,246787,17448,241612,14081,18642,109342,216019,15275,212032,12709,12351,78070,12183,57279,66445,67895,71934
hdca_c_57	Hexadecanoate synthesis	42	124	0.33871	0.568551	0	50799,22273,218756,56421,15929,76459,110446,100705,54403,78894,67041,14194,12715,11636,67863,11676,27402,13807,78830,67680,78920,224530,11409,230163,78801,246787,17448,241612,14081,18642,109342,216019,15275,212032,12709,12351,78070,12183,57279,66445,67895,71934
pa_hs_c_9	Phosphatidic acid synthesis	42	124	0.33871	0.568551	0	50799,22273,68262,17768,56421,76459,100705,14194,20537,12715,11636,67863,11676,27402,13807,14571,78830,67680,78920,14732,104112,230163,78801,246787,319848,17448,241612,14081,18642,109342,216019,15275,28169,212032,12709,12351,67512,12183,66445,67895,269951,71934
tag_hs_c_120	Triacylglycerol synthesis	42	124	0.33871	0.568551	0	50799,22273,68262,67800,17768,56421,15929,76459,100705,14194,20537,12715,11636,67863,11676,27402,13807,14571,78830,67680,78920,14732,104112,230163,78801,246787,50784,17448,14081,18642,216019,15275,28169,212032,12709,12351,67512,12183,66445,67895,13350,71934
tag_hs_c_157	Triacylglycerol synthesis	42	124	0.33871	0.568551	0	50799,22273,68262,218756,67800,17768,56421,17252,100705,54403,14194,20537,12715,11636,67863,11676,27402,13807,14571,78830,67680,78920,14732,11428,104112,230163,78801,246787,50784,17448,14081,18642,216019,15275,28169,212032,12709,67512,12183,66445,67895,13350
tag_hs_c_37	Triacylglycerol synthesis	42	124	0.33871	0.568551	0	50799,22273,68262,67800,17768,56421,76459,100705,14194,20537,12715,11636,67863,11676,27402,13807,14571,78830,67680,78920,14732,11428,104112,230163,78801,50784,17448,14081,18642,216019,15275,28169,212032,12709,12351,67512,12183,16956,66445,67895,13350,71934
tag_hs_c_39	Triacylglycerol synthesis	42	124	0.33871	0.568551	0	50799,22273,68262,67800,17768,56421,76459,100705,54403,14194,20537,12715,11636,67863,11676,27402,13807,14571,78830,67680,78920,14732,11428,104112,230163,78801,50784,17448,14081,18642,216019,15275,28169,212032,12709,12351,67512,12183,66445,67895,13350,71934
dag_hs_c_135	Diacylglycerol synthesis	43	127	0.338583	0.569858	0	50799,22273,68262,218756,17768,56421,76459,100705,54403,14194,12715,11636,67863,11676,27402,13807,14571,78830,67680,78920,14732,11428,104112,230163,78801,246787,50784,17448,241612,14081,18642,109342,216019,15275,28169,212032,12709,12351,67512,12183,66445,67895,71934
dag_hs_c_23	Diacylglycerol synthesis	43	127	0.338583	0.569858	0	50799,22273,68262,17768,56421,76459,100705,54403,14194,20537,12715,11636,67863,11676,27402,13807,14571,78830,67680,78920,14732,104112,230163,78801,246787,50784,17448,241612,14081,18642,109342,216019,15275,28169,212032,12709,12351,67512,12183,66445,67895,269951,71934
dag_hs_c_58	Diacylglycerol synthesis	43	127	0.338583	0.569858	0	50799,22273,68262,218756,17768,56421,15929,76459,100705,14194,20537,12715,11636,67863,11676,27402,13807,14571,78830,67680,78920,14732,104112,230163,78801,246787,50784,17448,241612,14081,18642,109342,216019,15275,28169,212032,12709,12351,67512,12183,66445,67895,71934
dag_hs_c_67	Diacylglycerol synthesis	43	127	0.338583	0.569858	0	50799,22273,68262,218756,17768,56421,76459,100705,54403,14194,12715,11636,67863,11676,27402,13807,14571,78830,67680,78920,14732,104112,230163,78801,246787,50784,17448,241612,14081,18642,109342,216019,15275,28169,212032,12709,12351,67512,12183,66445,67895,269951,71934
dag_hs_c_80	Diacylglycerol synthesis	43	127	0.338583	0.569858	0	50799,22273,68262,17768,56421,76459,100705,54403,14194,20537,12715,11636,67863,11676,27402,13807,14571,78830,67680,78920,14732,104112,230163,78801,246787,50784,17448,241612,14081,18642,109342,216019,15275,28169,212032,12709,12351,67512,12183,66445,67895,269951,71934
hdca_c_99	Hexadecanoate synthesis	43	127	0.338583	0.569858	0	50799,22273,56421,15929,76459,110446,100705,54403,78894,67041,14194,20537,12715,114479,11636,67863,11676,27402,13807,78830,67680,78920,224530,11409,230163,78801,246787,17448,241612,14081,18642,109342,216019,15275,212032,12709,12351,78070,12183,57279,66445,67895,71934
pa_hs_c_139	Phosphatidic acid synthesis	43	127	0.338583	0.569858	0	50799,22273,68262,17768,56421,15929,76459,100705,54403,14194,20537,12715,11636,67863,11676,27402,13807,14571,78830,67680,78920,14732,104112,230163,78801,246787,20515,17448,241612,14081,18642,109342,216019,15275,28169,212032,12709,12351,67512,12183,66445,67895,71934
pa_hs_c_240	Phosphatidic acid synthesis	43	127	0.338583	0.569858	0	50799,22273,68262,218756,17768,56421,15929,17252,76459,100705,14194,20537,12715,11636,67863,11676,27402,13807,14571,78830,67680,78920,14732,20505,104112,230163,78801,20515,17448,14081,18642,216019,15275,20531,28169,212032,12709,12351,67512,12183,66445,67895,71934
pa_hs_c_51	Phosphatidic acid synthesis	43	127	0.338583	0.569858	0	50799,22273,68262,218756,17768,56421,17252,76459,100705,14194,12715,11636,67863,11676,27402,13807,14571,78830,67680,78920,14732,104112,230163,78801,246787,20515,17448,241612,14081,18642,109342,216019,15275,28169,212032,12709,12351,67512,12183,66445,67895,269951,71934
pa_hs_c_63	Phosphatidic acid synthesis	43	127	0.338583	0.569858	0	50799,22273,68262,17768,56421,17252,76459,100705,14194,20537,12715,114479,11636,67863,11676,27402,13807,14571,78830,67680,78920,14732,104112,230163,78801,246787,17448,241612,14081,18642,109342,216019,15275,28169,212032,12709,12351,67512,12183,66445,67895,269951,71934
pail_hs_c_150	Phosphatidylinositol synthesis	43	127	0.338583	0.569858	0	50799,22273,68262,218756,56421,15929,100705,54403,14194,20537,12715,11636,67863,11676,27402,13807,78830,67680,78920,14732,11409,20505,104112,230163,78801,246787,114663,17448,14081,18642,216019,15275,20531,28169,212032,12709,78070,67512,12183,57279,66445,67895,269951
tag_hs_c_78	Triacylglycerol synthesis	43	127	0.338583	0.569858	0	50799,22273,68262,218756,67800,56421,17252,76459,100705,14194,20537,12715,114479,11636,67863,11676,27402,13807,78830,67680,78920,14732,104112,230163,78801,246787,50784,17448,14081,18642,216019,15275,28169,212032,12709,12351,67512,12183,66445,67895,269951,13350,71934
dag_hs_c_116	Diacylglycerol synthesis	44	130	0.338462	0.571149	0	50799,22273,68262,218756,17768,56421,17252,76459,100705,54403,14194,12715,11636,67863,11676,27402,13807,14571,78830,67680,78920,14732,104112,230163,78801,246787,50784,17448,241612,14081,18642,109342,216019,15275,28169,212032,12709,12351,67512,12183,66445,67895,269951,71934
dag_hs_c_121	Diacylglycerol synthesis	44	130	0.338462	0.571149	0	50799,22273,68262,17768,56421,17252,76459,100705,54403,14194,20537,12715,11636,67863,11676,27402,13807,14571,78830,67680,78920,14732,11428,104112,230163,78801,246787,50784,17448,241612,14081,18642,109342,216019,15275,28169,212032,12709,12351,67512,12183,66445,67895,71934
dag_hs_c_123	Diacylglycerol synthesis	44	130	0.338462	0.571149	0	50799,22273,68262,17768,56421,76459,100705,54403,14194,20537,12715,114479,11636,67863,11676,27402,13807,14571,78830,67680,78920,14732,11428,104112,230163,78801,246787,50784,17448,241612,14081,18642,109342,216019,15275,28169,212032,12709,12351,67512,12183,66445,67895,71934
dag_hs_c_187	Diacylglycerol synthesis	44	130	0.338462	0.571149	0	50799,22273,68262,17768,56421,17252,76459,100705,54403,14194,20537,12715,11636,67863,11676,27402,13807,14571,78830,67680,78920,14732,104112,230163,78801,246787,50784,17448,241612,14081,18642,109342,216019,15275,28169,212032,12709,12351,67512,12183,66445,67895,269951,71934
dag_hs_c_19	Diacylglycerol synthesis	44	130	0.338462	0.571149	0	50799,22273,68262,17768,56421,17252,76459,100705,54403,14194,20537,12715,11636,67863,11676,27402,13807,14571,78830,67680,78920,14732,11428,104112,230163,78801,246787,50784,17448,241612,14081,18642,109342,216019,15275,28169,212032,12709,12351,67512,12183,66445,67895,71934
tag_hs_c_118	Triacylglycerol synthesis	44	130	0.338462	0.571149	0	50799,22273,68262,67800,56421,76459,100705,54403,14194,20537,12715,11636,67863,11676,27402,13807,78830,67680,78920,14732,14120,104112,230163,78801,246787,50784,17448,241612,14081,18642,109342,216019,15275,28169,212032,12709,12351,67512,12183,66445,67895,269951,13350,71934
tag_hs_c_153	Triacylglycerol synthesis	44	130	0.338462	0.571149	0	50799,22273,69519,68262,67800,56421,76459,100705,54403,14194,20537,12715,11636,67863,11676,27402,13807,78830,67680,78920,14732,104112,230163,78801,246787,50784,17448,241612,14081,18642,109342,216019,15275,28169,212032,12709,12351,67512,12183,66445,67895,269951,13350,71934
tag_hs_c_155	Triacylglycerol synthesis	44	130	0.338462	0.571149	0	50799,22273,68262,218756,67800,56421,76459,100705,54403,14194,20537,12715,11636,67863,11676,27402,13807,78830,67680,78920,14732,104112,230163,78801,246787,50784,17448,241612,14081,18642,109342,216019,15275,28169,212032,12709,12351,67512,12183,66445,67895,269951,13350,71934
tag_hs_c_173	Triacylglycerol synthesis	44	130	0.338462	0.571149	0	50799,22273,69519,68262,67800,56421,76459,100705,54403,14194,20537,12715,11636,67863,11676,27402,13807,78830,67680,78920,14732,104112,230163,78801,246787,50784,17448,241612,14081,18642,109342,216019,15275,28169,212032,12709,12351,67512,12183,66445,67895,269951,13350,71934
tag_hs_c_57	Triacylglycerol synthesis	44	130	0.338462	0.571149	0	50799,22273,68262,218756,67800,17768,56421,17252,76459,100705,54403,14194,20537,12715,11636,67863,11676,27402,13807,14571,78830,67680,78920,14732,104112,230163,78801,50784,17448,14081,18642,216019,15275,28169,212032,12709,12351,67512,12183,66445,67895,269951,13350,71934
dag_hs_c_30	Diacylglycerol synthesis	45	133	0.338346	0.572423	0	50799,22273,68262,17768,56421,15929,17252,76459,100705,54403,14194,20537,12715,114479,11636,67863,11676,27402,13807,14571,78830,67680,78920,14732,104112,230163,78801,246787,50784,17448,241612,14081,18642,109342,216019,15275,28169,212032,12709,12351,67512,12183,66445,67895,71934
dag_hs_c_8	Diacylglycerol synthesis	45	133	0.338346	0.572423	0	50799,22273,68262,218756,17768,56421,17252,76459,100705,14194,20537,12715,114479,11636,67863,11676,27402,13807,14571,78830,67680,78920,14732,11428,104112,230163,78801,246787,50784,17448,241612,14081,18642,109342,216019,15275,28169,212032,12709,12351,67512,12183,66445,67895,71934
hdca_c_139	Hexadecanoate synthesis	45	133	0.338346	0.572423	0	50799,22273,218756,56421,15929,17252,76459,110446,100705,78894,67041,14194,20537,12715,114479,11636,67863,11676,27402,13807,78830,67680,78920,224530,11409,230163,107605,78801,246787,17448,241612,14081,18642,109342,216019,15275,212032,12709,12351,78070,12183,57279,66445,67895,71934
pa_hs_c_96	Phosphatidic acid synthesis	45	133	0.338346	0.572423	0	50799,22273,68262,218756,17768,56421,17252,76459,100705,54403,20544,14194,12715,11636,67863,11676,27402,13807,14571,78830,67680,78920,14732,104112,230163,78801,246787,20515,17448,241612,14081,18642,109342,216019,15275,28169,212032,12709,12351,67512,12183,66445,67895,269951,71934
tag_hs_c_14	Triacylglycerol synthesis	45	133	0.338346	0.572423	0	50799,22273,68262,67800,17768,56421,17252,76459,100705,14194,20537,12715,11636,67863,11676,27402,13807,14571,78830,67680,78920,14732,11428,104112,230163,78801,246787,50784,17448,241612,14081,18642,109342,216019,15275,28169,212032,12709,12351,67512,12183,66445,67895,13350,71934
tag_hs_c_171	Triacylglycerol synthesis	45	133	0.338346	0.572423	0	50799,22273,69519,68262,67800,56421,17252,76459,100705,54403,14194,20537,12715,11636,67863,11676,27402,13807,78830,67680,78920,14732,104112,230163,78801,246787,50784,17448,241612,14081,18642,109342,216019,15275,28169,212032,12709,12351,67512,12183,66445,67895,269951,13350,71934
tag_hs_c_179	Triacylglycerol synthesis	45	133	0.338346	0.572423	0	50799,22273,68262,67800,17768,56421,17252,76459,100705,54403,14194,12715,11636,67863,11676,27402,13807,14571,78830,67680,78920,14732,104112,230163,78801,246787,50784,17448,241612,14081,18642,109342,216019,15275,28169,212032,12709,12351,67512,12183,66445,67895,269951,13350,71934
tag_hs_c_186	Triacylglycerol synthesis	45	133	0.338346	0.572423	0	50799,22273,68262,67800,17768,56421,15929,17252,76459,100705,54403,14194,20537,12715,114479,11636,67863,11676,27402,13807,14571,78830,67680,78920,14732,104112,230163,107605,78801,50784,17448,14081,18642,216019,15275,28169,212032,12709,12351,67512,12183,66445,67895,13350,71934
tag_hs_c_30	Triacylglycerol synthesis	45	133	0.338346	0.572423	0	50799,22273,68262,67800,17768,56421,17252,76459,100705,14194,20537,12715,11636,67863,11676,27402,13807,14571,78830,67680,78920,14732,104112,230163,78801,246787,50784,17448,241612,14081,18642,109342,216019,15275,28169,212032,12709,12351,67512,12183,66445,67895,269951,13350,71934
dag_hs_c_211	Diacylglycerol synthesis	46	136	0.338235	0.573682	0	50799,22273,68262,17768,56421,17252,76459,100705,54403,14194,20537,12715,114479,11636,67863,11676,27402,13807,14571,78830,67680,78920,14732,104112,230163,107605,78801,246787,50784,17448,241612,14081,18642,109342,216019,15275,28169,212032,12709,12351,67512,12183,66445,67895,269951,71934
tag_hs_c_146	Triacylglycerol synthesis	46	136	0.338235	0.573682	0	50799,22273,68262,67800,17768,56421,17252,76459,100705,14194,20537,12715,11636,67863,11676,27402,13807,14571,78830,67680,78920,14732,11428,104112,230163,107605,78801,246787,50784,17448,241612,14081,18642,109342,216019,15275,28169,212032,12709,12351,67512,12183,66445,67895,13350,71934
tag_hs_c_35	Triacylglycerol synthesis	46	136	0.338235	0.573682	0	50799,22273,68262,67800,17768,56421,17252,76459,100705,54403,14194,20537,12715,11636,67863,11676,27402,13807,14571,78830,67680,78920,14732,11428,104112,230163,78801,246787,50784,17448,241612,14081,18642,109342,216019,15275,28169,212032,12709,12351,67512,12183,66445,67895,13350,71934
pail_hs_c_21	Phosphatidylinositol synthesis	47	139	0.338129	0.574926	0	50799,22273,68262,17768,56421,17252,76459,110446,100705,54403,78894,67041,14194,20537,12715,11636,67863,11676,27402,13807,14571,78830,67680,78920,14732,224530,20505,230163,78801,114663,20515,17448,14081,18642,216019,15275,20531,28169,212032,12709,12351,67512,12183,66445,67895,269951,71934
pail_hs_c_216	Phosphatidylinositol synthesis	47	139	0.338129	0.574926	0	50799,22273,68262,17768,56421,17252,110446,100705,54403,78894,67041,14194,20537,12715,11636,67863,11676,27402,13807,14571,78830,67680,78920,14732,224530,20505,230163,78801,246787,114663,20515,17448,241612,14081,18642,109342,216019,15275,20531,28169,212032,12709,67512,12183,66445,67895,269951
pail_hs_c_236	Phosphatidylinositol synthesis	47	139	0.338129	0.574926	0	50799,22273,68262,17768,56421,76459,110446,100705,78894,67041,14194,20537,12715,11636,67863,11676,27402,13807,14571,78830,67680,78920,14732,224530,20505,230163,78801,246787,114663,17448,241612,14081,18642,109342,216019,15275,20531,28169,212032,12709,12351,67512,12183,66445,67895,269951,71934
hdca_c_5	Hexadecanoate synthesis	37	110	0.336364	0.589606	0	50799,22273,218756,56421,15929,110446,100705,78894,67041,14194,20537,12715,11636,67863,11676,27402,13807,78830,67680,78920,224530,11409,230163,78801,246787,17448,14081,18642,216019,15275,212032,12709,78070,12183,57279,66445,67895
dag_hs_c_102	Diacylglycerol synthesis	38	113	0.336283	0.590653	0	50799,22273,68262,17768,56421,100705,54403,14194,20537,12715,11636,67863,11676,27402,13807,14571,78830,67680,78920,14732,104112,230163,78801,246787,50784,17448,14081,18642,216019,15275,28169,212032,12709,67512,12183,66445,67895,269951
dag_hs_c_137	Diacylglycerol synthesis	38	113	0.336283	0.590653	0	50799,22273,68262,17768,56421,100705,54403,14194,20537,12715,11636,67863,11676,27402,13807,14571,78830,67680,78920,14732,104112,230163,78801,246787,50784,17448,14081,18642,216019,15275,28169,212032,12709,67512,12183,66445,67895,269951
dag_hs_c_186	Diacylglycerol synthesis	38	113	0.336283	0.590653	0	50799,22273,68262,17768,56421,100705,54403,14194,20537,12715,11636,67863,11676,27402,13807,14571,78830,67680,78920,14732,104112,230163,78801,246787,50784,17448,14081,18642,216019,15275,28169,212032,12709,67512,12183,66445,67895,269951
dag_hs_c_61	Diacylglycerol synthesis	38	113	0.336283	0.590653	0	50799,22273,68262,17768,56421,100705,54403,14194,20537,12715,11636,67863,11676,27402,13807,14571,78830,67680,78920,14732,104112,230163,78801,246787,50784,17448,14081,18642,216019,15275,28169,212032,12709,67512,12183,66445,67895,269951
dag_hs_c_165	Diacylglycerol synthesis	39	116	0.336207	0.591692	0	50799,22273,68262,218756,17768,56421,100705,54403,20544,14194,12715,11636,67863,11676,27402,13807,14571,78830,67680,78920,14732,11428,104112,230163,78801,246787,50784,17448,14081,18642,216019,15275,28169,212032,12709,67512,12183,66445,67895
dag_hs_c_212	Diacylglycerol synthesis	39	116	0.336207	0.591692	0	50799,22273,68262,17768,56421,15929,100705,54403,14194,20537,12715,114479,11636,67863,11676,27402,13807,14571,78830,67680,78920,14732,104112,230163,78801,246787,50784,17448,14081,18642,216019,15275,28169,212032,12709,67512,12183,66445,67895
hdca_c_136	Hexadecanoate synthesis	39	116	0.336207	0.591692	0	50799,22273,56421,15929,110446,100705,54403,78894,67041,14194,20537,12715,11636,67863,11676,27402,13807,78830,67680,78920,224530,11409,230163,78801,246787,17448,241612,14081,18642,109342,216019,15275,212032,12709,78070,12183,57279,66445,67895
hdca_c_49	Hexadecanoate synthesis	39	116	0.336207	0.591692	0	50799,22273,56421,15929,110446,100705,54403,78894,67041,14194,20537,12715,11636,67863,11676,27402,13807,78830,67680,78920,224530,11409,230163,78801,246787,17448,241612,14081,18642,109342,216019,15275,212032,12709,78070,12183,57279,66445,67895
tag_hs_c_1	Triacylglycerol synthesis	39	116	0.336207	0.591692	0	50799,22273,68262,218756,67800,56421,17252,100705,14194,20537,12715,11636,67863,11676,27402,13807,78830,67680,78920,14732,104112,230163,78801,246787,50784,17448,14081,18642,216019,15275,28169,212032,12709,67512,12183,66445,67895,269951,13350
tag_hs_c_175	Triacylglycerol synthesis	39	116	0.336207	0.591692	0	50799,22273,68262,67800,17768,56421,15929,100705,54403,14194,20537,12715,11636,67863,11676,27402,13807,14571,78830,67680,78920,14732,104112,230163,78801,50784,17448,14081,18642,216019,15275,28169,212032,12709,67512,12183,66445,67895,13350
dag_hs_c_12	Diacylglycerol synthesis	40	119	0.336134	0.592724	0	50799,22273,68262,17768,56421,100705,54403,14194,20537,12715,11636,67863,11676,27402,13807,14571,78830,67680,78920,14732,104112,230163,78801,246787,50784,17448,241612,14081,18642,109342,216019,15275,28169,212032,12709,67512,12183,66445,67895,269951
dag_hs_c_207	Diacylglycerol synthesis	40	119	0.336134	0.592724	0	50799,22273,68262,17768,56421,15929,100705,54403,14194,20537,12715,11636,67863,11676,27402,13807,14571,78830,67680,78920,14732,104112,230163,78801,246787,50784,17448,241612,14081,18642,109342,216019,15275,28169,212032,12709,67512,12183,66445,67895
dag_hs_c_214	Diacylglycerol synthesis	40	119	0.336134	0.592724	0	50799,22273,68262,17768,56421,100705,54403,14194,20537,12715,11636,67863,11676,27402,13807,14571,78830,67680,78920,14732,104112,230163,78801,246787,50784,17448,241612,14081,18642,109342,216019,15275,28169,212032,12709,67512,12183,66445,67895,269951
pa_hs_c_138	Phosphatidic acid synthesis	40	119	0.336134	0.592724	0	50799,22273,68262,17768,56421,76459,100705,14194,20537,12715,11636,67863,11676,27402,13807,14571,78830,67680,78920,14732,20505,104112,230163,78801,17448,14081,18642,216019,15275,20531,28169,212032,12709,12351,67512,12183,66445,67895,269951,71934
pa_hs_c_143	Phosphatidic acid synthesis	40	119	0.336134	0.592724	0	50799,22273,68262,17768,56421,17252,100705,54403,14194,20537,12715,11636,67863,11676,27402,13807,14571,78830,67680,78920,14732,104112,230163,78801,246787,17448,241612,14081,18642,109342,216019,15275,28169,212032,12709,67512,12183,66445,67895,269951
pa_hs_c_230	Phosphatidic acid synthesis	40	119	0.336134	0.592724	0	50799,22273,68262,218756,17768,56421,17252,100705,54403,14194,20537,12715,11636,67863,11676,27402,13807,14571,78830,67680,78920,14732,104112,230163,78801,246787,20515,17448,14081,18642,216019,15275,28169,212032,12709,67512,12183,66445,67895,269951
pa_hs_c_24	Phosphatidic acid synthesis	40	119	0.336134	0.592724	0	50799,22273,68262,17768,56421,100705,54403,20544,14194,20537,12715,11636,67863,11676,27402,13807,14571,78830,67680,78920,14732,11428,20505,104112,230163,78801,20515,17448,14081,18642,216019,15275,20531,28169,212032,12709,67512,12183,66445,67895
tag_hs_c_140	Triacylglycerol synthesis	40	119	0.336134	0.592724	0	50799,22273,69519,68262,67800,56421,100705,54403,14194,12715,11636,67863,11676,27402,13807,78830,67680,78920,14732,104112,230163,78801,246787,50784,17448,241612,14081,18642,109342,216019,15275,28169,212032,12709,67512,12183,66445,67895,269951,13350
dag_hs_c_161	Diacylglycerol synthesis	41	122	0.336066	0.593749	0	50799,22273,68262,17768,56421,100705,54403,20544,14194,20537,12715,11636,67863,11676,27402,13807,14571,78830,67680,78920,14732,104112,230163,78801,246787,50784,17448,241612,14081,18642,109342,216019,15275,28169,212032,12709,67512,12183,66445,67895,269951
dag_hs_c_88	Diacylglycerol synthesis	41	122	0.336066	0.593749	0	50799,22273,68262,17768,56421,100705,54403,20544,14194,20537,12715,11636,67863,11676,27402,13807,14571,78830,67680,78920,14732,11428,104112,230163,78801,246787,50784,17448,241612,14081,18642,109342,216019,15275,28169,212032,12709,67512,12183,66445,67895
hdca_c_133	Hexadecanoate synthesis	41	122	0.336066	0.593749	0	50799,22273,56421,15929,76459,110446,100705,78894,67041,14194,20537,12715,11636,67863,11676,27402,13807,78830,67680,78920,224530,11409,230163,78801,246787,17448,241612,14081,18642,109342,216019,15275,212032,12709,12351,78070,12183,57279,66445,67895,71934
pa_hs_c_144	Phosphatidic acid synthesis	41	122	0.336066	0.593749	0	50799,22273,68262,17768,56421,76459,100705,14194,20537,12715,11636,67863,11676,27402,13807,14571,78830,67680,78920,14732,11428,20505,104112,230163,78801,246787,17448,14081,18642,216019,15275,20531,28169,212032,12709,12351,67512,12183,66445,67895,71934
pa_hs_c_162	Phosphatidic acid synthesis	41	122	0.336066	0.593749	0	50799,22273,68262,17768,56421,76459,100705,14194,12715,11636,67863,11676,27402,13807,14571,78830,67680,78920,14732,104112,230163,78801,246787,20515,17448,241612,14081,18642,109342,216019,15275,28169,212032,12709,12351,67512,12183,66445,67895,269951,71934
tag_hs_c_116	Triacylglycerol synthesis	41	122	0.336066	0.593749	0	50799,22273,69519,68262,67800,56421,100705,54403,20544,14194,12715,11636,67863,11676,27402,13807,78830,67680,78920,14732,104112,230163,78801,246787,50784,17448,241612,14081,18642,109342,216019,15275,28169,212032,12709,67512,12183,66445,67895,269951,13350
tag_hs_c_148	Triacylglycerol synthesis	41	122	0.336066	0.593749	0	50799,22273,68262,67800,17768,56421,76459,100705,14194,20537,12715,11636,67863,11676,27402,13807,14571,78830,67680,78920,14732,11428,104112,230163,78801,50784,17448,14081,18642,216019,15275,28169,212032,12709,12351,67512,12183,66445,67895,13350,71934
tag_hs_c_194	Triacylglycerol synthesis	41	122	0.336066	0.593749	0	50799,22273,69519,68262,67800,56421,100705,54403,20544,14194,12715,11636,67863,11676,27402,13807,78830,67680,78920,14732,104112,230163,78801,246787,50784,17448,241612,14081,18642,109342,216019,15275,28169,212032,12709,67512,12183,66445,67895,269951,13350
tag_hs_c_246	Triacylglycerol synthesis	41	122	0.336066	0.593749	0	50799,22273,68262,67800,17768,56421,17252,100705,54403,14194,20537,12715,11636,67863,11676,27402,13807,14571,78830,67680,78920,14732,11428,104112,230163,78801,246787,50784,17448,14081,18642,216019,15275,28169,212032,12709,67512,12183,66445,67895,13350
tag_hs_c_75	Triacylglycerol synthesis	41	122	0.336066	0.593749	0	50799,22273,69519,68262,67800,56421,100705,54403,20544,14194,12715,11636,67863,11676,27402,13807,78830,67680,78920,14732,104112,230163,78801,246787,50784,17448,241612,14081,18642,109342,216019,15275,28169,212032,12709,67512,12183,66445,67895,269951,13350
dag_hs_c_139	Diacylglycerol synthesis	42	125	0.336	0.594768	0	50799,22273,68262,17768,56421,76459,100705,54403,14194,12715,11636,67863,11676,27402,13807,14571,78830,67680,78920,14732,104112,230163,78801,246787,50784,17448,241612,14081,18642,109342,216019,15275,28169,212032,12709,12351,67512,12183,66445,67895,269951,71934
dag_hs_c_182	Diacylglycerol synthesis	42	125	0.336	0.594768	0	50799,22273,68262,17768,56421,76459,100705,54403,14194,12715,11636,67863,11676,27402,13807,14571,78830,67680,78920,14732,104112,230163,78801,246787,50784,17448,241612,14081,18642,109342,216019,15275,28169,212032,12709,12351,67512,12183,66445,67895,269951,71934
dag_hs_c_190	Diacylglycerol synthesis	42	125	0.336	0.594768	0	50799,22273,68262,17768,56421,76459,100705,14194,20537,12715,11636,67863,11676,27402,13807,14571,78830,67680,78920,14732,104112,230163,78801,246787,50784,17448,241612,14081,18642,109342,216019,15275,28169,212032,12709,12351,67512,12183,66445,67895,269951,71934
dag_hs_c_191	Diacylglycerol synthesis	42	125	0.336	0.594768	0	50799,22273,68262,17768,56421,76459,100705,54403,14194,12715,11636,67863,11676,27402,13807,14571,78830,67680,78920,14732,104112,230163,78801,246787,50784,17448,241612,14081,18642,109342,216019,15275,28169,212032,12709,12351,67512,12183,66445,67895,269951,71934
dag_hs_c_44	Diacylglycerol synthesis	42	125	0.336	0.594768	0	50799,22273,68262,17768,56421,76459,100705,14194,20537,12715,11636,67863,11676,27402,13807,14571,78830,67680,78920,14732,11428,104112,230163,78801,246787,50784,17448,241612,14081,18642,109342,216019,15275,28169,212032,12709,12351,67512,12183,66445,67895,71934
dag_hs_c_92	Diacylglycerol synthesis	42	125	0.336	0.594768	0	50799,22273,68262,17768,56421,76459,100705,14194,20537,12715,11636,67863,11676,27402,13807,14571,78830,67680,78920,14732,104112,230163,78801,246787,50784,17448,241612,14081,18642,109342,216019,15275,28169,212032,12709,12351,67512,12183,66445,67895,269951,71934
hdca_c_112	Hexadecanoate synthesis	42	125	0.336	0.594768	0	50799,22273,56421,15929,76459,110446,100705,54403,78894,67041,14194,20537,12715,11636,67863,11676,27402,13807,78830,67680,78920,224530,11409,230163,78801,246787,17448,241612,14081,18642,109342,216019,15275,212032,12709,12351,78070,12183,57279,66445,67895,71934
hdca_c_142	Hexadecanoate synthesis	42	125	0.336	0.594768	0	50799,22273,56421,15929,76459,110446,100705,78894,67041,14194,20537,12715,114479,11636,67863,11676,27402,13807,78830,67680,78920,224530,11409,230163,78801,246787,17448,241612,14081,18642,109342,216019,15275,212032,12709,12351,78070,12183,57279,66445,67895,71934
hdca_c_154	Hexadecanoate synthesis	42	125	0.336	0.594768	0	50799,22273,218756,56421,15929,76459,110446,100705,54403,78894,67041,14194,12715,11636,67863,11676,27402,13807,78830,67680,78920,224530,11409,230163,78801,246787,17448,241612,14081,18642,109342,216019,15275,212032,12709,12351,78070,12183,57279,66445,67895,71934
hdca_c_201	Hexadecanoate synthesis	42	125	0.336	0.594768	0	50799,22273,56421,15929,76459,110446,100705,54403,78894,67041,14194,20537,12715,11636,67863,11676,27402,13807,78830,67680,78920,224530,11409,230163,78801,246787,17448,241612,14081,18642,109342,216019,15275,212032,12709,12351,78070,12183,57279,66445,67895,71934
pa_hs_c_147	Phosphatidic acid synthesis	42	125	0.336	0.594768	0	50799,22273,68262,17768,56421,76459,100705,14194,20537,12715,11636,67863,11676,27402,13807,14571,78830,67680,78920,14732,104112,230163,78801,246787,319848,17448,241612,14081,18642,109342,216019,15275,28169,212032,12709,12351,67512,12183,66445,67895,269951,71934
pa_hs_c_155	Phosphatidic acid synthesis	42	125	0.336	0.594768	0	50799,22273,68262,17768,56421,76459,100705,54403,14194,12715,11636,67863,11676,27402,13807,14571,78830,67680,78920,14732,11428,104112,230163,78801,246787,20515,17448,241612,14081,18642,109342,216019,15275,28169,212032,12709,12351,67512,12183,66445,67895,71934
pa_hs_c_176	Phosphatidic acid synthesis	42	125	0.336	0.594768	0	50799,22273,68262,17768,56421,15929,76459,100705,14194,20537,12715,11636,67863,11676,27402,13807,14571,78830,67680,78920,14732,104112,230163,78801,246787,20515,17448,241612,14081,18642,109342,216019,15275,28169,212032,12709,12351,67512,12183,66445,67895,71934
pa_hs_c_210	Phosphatidic acid synthesis	42	125	0.336	0.594768	0	50799,22273,68262,17768,56421,76459,100705,54403,14194,12715,11636,67863,11676,27402,13807,14571,78830,67680,78920,14732,11428,104112,230163,78801,246787,20515,17448,241612,14081,18642,109342,216019,15275,28169,212032,12709,12351,67512,12183,66445,67895,71934
pa_hs_c_239	Phosphatidic acid synthesis	42	125	0.336	0.594768	0	50799,22273,68262,17768,56421,15929,17252,100705,54403,14194,20537,12715,11636,67863,11676,27402,13807,14571,78830,67680,78920,14732,20505,104112,230163,78801,246787,17448,241612,14081,18642,109342,216019,15275,20531,28169,212032,12709,67512,12183,66445,67895
pa_hs_c_57	Phosphatidic acid synthesis	42	125	0.336	0.594768	0	50799,22273,68262,17768,56421,76459,100705,14194,20537,12715,11636,67863,11676,27402,13807,14571,78830,67680,78920,14732,104112,230163,78801,246787,20515,17448,241612,14081,18642,109342,216019,15275,28169,212032,12709,12351,67512,12183,66445,67895,269951,71934
tag_hs_c_129	Triacylglycerol synthesis	42	125	0.336	0.594768	0	50799,22273,68262,67800,17768,56421,15929,76459,100705,14194,20537,12715,11636,67863,11676,27402,13807,14571,78830,67680,78920,14732,104112,230163,78801,246787,50784,17448,14081,18642,216019,15275,28169,212032,12709,12351,67512,12183,66445,67895,13350,71934
dag_hs_c_146	Diacylglycerol synthesis	43	128	0.335938	0.59578	0	50799,22273,68262,17768,56421,17252,76459,100705,14194,20537,12715,11636,67863,11676,27402,13807,14571,78830,67680,78920,14732,104112,230163,78801,246787,50784,17448,241612,14081,18642,109342,216019,15275,28169,212032,12709,12351,67512,12183,66445,67895,269951,71934
dag_hs_c_194	Diacylglycerol synthesis	43	128	0.335938	0.59578	0	50799,22273,68262,17768,56421,17252,76459,100705,14194,20537,12715,11636,67863,11676,27402,13807,14571,78830,67680,78920,14732,11428,104112,230163,78801,246787,50784,17448,241612,14081,18642,109342,216019,15275,28169,212032,12709,12351,67512,12183,66445,67895,71934
dag_hs_c_218	Diacylglycerol synthesis	43	128	0.335938	0.59578	0	50799,22273,68262,17768,56421,17252,76459,100705,14194,20537,12715,11636,67863,11676,27402,13807,14571,78830,67680,78920,14732,11428,104112,230163,78801,246787,50784,17448,241612,14081,18642,109342,216019,15275,28169,212032,12709,12351,67512,12183,66445,67895,71934
dag_hs_c_231	Diacylglycerol synthesis	43	128	0.335938	0.59578	0	50799,22273,68262,17768,56421,17252,76459,100705,54403,14194,12715,11636,67863,11676,27402,13807,14571,78830,67680,78920,14732,104112,230163,78801,246787,50784,17448,241612,14081,18642,109342,216019,15275,28169,212032,12709,12351,67512,12183,66445,67895,269951,71934
hdca_c_114	Hexadecanoate synthesis	43	128	0.335938	0.59578	0	50799,22273,56421,15929,76459,110446,100705,54403,78894,67041,14194,20537,12715,114479,11636,67863,11676,27402,13807,78830,67680,78920,224530,11409,230163,78801,246787,17448,241612,14081,18642,109342,216019,15275,212032,12709,12351,78070,12183,57279,66445,67895,71934
hdca_c_222	Hexadecanoate synthesis	43	128	0.335938	0.59578	0	50799,22273,56421,15929,76459,110446,100705,54403,78894,67041,14194,20537,12715,114479,11636,67863,11676,27402,13807,78830,67680,78920,224530,11409,230163,78801,246787,17448,241612,14081,18642,109342,216019,15275,212032,12709,12351,78070,12183,57279,66445,67895,71934
pa_hs_c_158	Phosphatidic acid synthesis	43	128	0.335938	0.59578	0	50799,22273,68262,218756,17768,56421,17252,76459,100705,14194,20537,12715,11636,67863,11676,27402,13807,14571,78830,67680,78920,14732,20505,104112,230163,78801,20515,17448,14081,18642,216019,15275,20531,28169,212032,12709,12351,67512,12183,66445,67895,269951,71934
pa_hs_c_199	Phosphatidic acid synthesis	43	128	0.335938	0.59578	0	50799,22273,68262,17768,56421,76459,100705,54403,14194,20537,12715,11636,67863,11676,27402,13807,14571,78830,67680,78920,14732,11428,104112,230163,78801,246787,319848,17448,241612,14081,18642,109342,216019,15275,28169,212032,12709,12351,67512,12183,66445,67895,71934
pa_hs_c_203	Phosphatidic acid synthesis	43	128	0.335938	0.59578	0	50799,22273,68262,17768,56421,17252,76459,100705,54403,14194,20537,12715,114479,11636,67863,11676,27402,13807,14571,78830,67680,78920,14732,20505,104112,230163,78801,17448,14081,18642,216019,15275,20531,28169,212032,12709,12351,67512,12183,66445,67895,269951,71934
pa_hs_c_6	Phosphatidic acid synthesis	43	128	0.335938	0.59578	0	50799,22273,68262,218756,17768,56421,17252,76459,100705,14194,20537,12715,11636,67863,11676,27402,13807,14571,78830,67680,78920,14732,20505,104112,230163,78801,20515,17448,14081,18642,216019,15275,20531,28169,212032,12709,12351,67512,12183,66445,67895,269951,71934
tag_hs_c_125	Triacylglycerol synthesis	43	128	0.335938	0.59578	0	50799,22273,68262,67800,17768,56421,15929,76459,100705,14194,20537,12715,114479,11636,67863,11676,27402,13807,14571,78830,67680,78920,14732,104112,230163,78801,50784,17448,14081,18642,216019,15275,28169,212032,12709,12351,67512,12183,16956,66445,67895,13350,71934
tag_hs_c_26	Triacylglycerol synthesis	43	128	0.335938	0.59578	0	50799,22273,68262,218756,67800,56421,76459,100705,54403,14194,12715,11636,67863,11676,27402,13807,78830,67680,78920,14732,104112,230163,78801,246787,50784,17448,241612,14081,18642,109342,216019,15275,28169,212032,12709,12351,67512,12183,66445,67895,269951,13350,71934
tag_hs_c_60	Triacylglycerol synthesis	43	128	0.335938	0.59578	0	50799,22273,68262,67800,17768,56421,17252,76459,100705,14194,20537,12715,11636,67863,11676,27402,13807,14571,78830,67680,78920,14732,104112,230163,78801,50784,17448,14081,18642,216019,15275,28169,212032,12709,12351,67512,12183,16956,66445,67895,269951,13350,71934
tag_hs_c_87	Triacylglycerol synthesis	43	128	0.335938	0.59578	0	50799,22273,68262,67800,17768,56421,17252,76459,100705,14194,20537,12715,114479,11636,67863,11676,27402,13807,14571,78830,67680,78920,14732,11428,104112,230163,78801,50784,17448,14081,18642,216019,15275,28169,212032,12709,12351,67512,12183,66445,67895,13350,71934
dag_hs_c_170	Diacylglycerol synthesis	44	131	0.335878	0.596785	0	50799,22273,68262,17768,56421,15929,17252,76459,100705,54403,14194,20537,12715,11636,67863,11676,27402,13807,14571,78830,67680,78920,14732,104112,230163,78801,246787,50784,17448,241612,14081,18642,109342,216019,15275,28169,212032,12709,12351,67512,12183,66445,67895,71934
hdca_c_239	Hexadecanoate synthesis	44	131	0.335878	0.596785	0	50799,22273,218756,56421,15929,17252,76459,110446,100705,78894,67041,14194,20537,12715,114479,11636,67863,11676,27402,13807,78830,67680,78920,224530,11409,230163,78801,246787,17448,241612,14081,18642,109342,216019,15275,212032,12709,12351,78070,12183,57279,66445,67895,71934
hdca_c_34	Hexadecanoate synthesis	44	131	0.335878	0.596785	0	50799,22273,56421,15929,17252,76459,110446,100705,54403,78894,67041,14194,20537,12715,114479,11636,67863,11676,27402,13807,78830,67680,78920,224530,11409,230163,78801,246787,17448,241612,14081,18642,109342,216019,15275,212032,12709,12351,78070,12183,57279,66445,67895,71934
pa_hs_c_181	Phosphatidic acid synthesis	44	131	0.335878	0.596785	0	50799,22273,68262,17768,56421,17252,76459,100705,54403,14194,12715,11636,67863,11676,27402,13807,14571,78830,67680,78920,14732,20505,104112,230163,78801,246787,17448,241612,14081,18642,109342,216019,15275,20531,28169,212032,12709,12351,67512,12183,66445,67895,269951,71934
pa_hs_c_90	Phosphatidic acid synthesis	44	131	0.335878	0.596785	0	50799,22273,68262,17768,56421,15929,17252,76459,100705,54403,14194,20537,12715,11636,67863,11676,27402,13807,14571,78830,67680,78920,14732,104112,230163,78801,246787,20515,17448,241612,14081,18642,109342,216019,15275,28169,212032,12709,12351,67512,12183,66445,67895,71934
pa_hs_c_91	Phosphatidic acid synthesis	44	131	0.335878	0.596785	0	50799,22273,68262,218756,17768,56421,17252,76459,100705,14194,20537,12715,114479,11636,67863,11676,27402,13807,14571,78830,67680,78920,14732,104112,230163,78801,246787,17448,241612,14081,18642,109342,216019,15275,28169,212032,12709,12351,67512,12183,66445,67895,269951,71934
pa_hs_c_92	Phosphatidic acid synthesis	44	131	0.335878	0.596785	0	50799,22273,68262,17768,56421,15929,17252,76459,100705,54403,14194,20537,12715,114479,11636,67863,11676,27402,13807,14571,78830,67680,78920,14732,104112,230163,78801,246787,17448,241612,14081,18642,109342,216019,15275,28169,212032,12709,12351,67512,12183,66445,67895,71934
pail_hs_c_199	Phosphatidylinositol synthesis	44	131	0.335878	0.596785	0	50799,22273,68262,17768,56421,15929,110446,100705,54403,78894,67041,14194,20537,12715,114479,11636,67863,11676,27402,13807,14571,78830,67680,78920,14732,224530,230163,78801,246787,114663,17448,241612,14081,18642,109342,216019,15275,28169,212032,12709,67512,12183,66445,67895
tag_hs_c_136	Triacylglycerol synthesis	44	131	0.335878	0.596785	0	50799,22273,68262,67800,56421,76459,100705,54403,14194,20537,12715,11636,67863,11676,27402,13807,78830,67680,78920,14732,14120,104112,230163,78801,246787,50784,17448,241612,14081,18642,109342,216019,15275,28169,212032,12709,12351,67512,12183,66445,67895,269951,13350,71934
tag_hs_c_159	Triacylglycerol synthesis	44	131	0.335878	0.596785	0	50799,22273,69519,68262,67800,56421,76459,100705,54403,14194,20537,12715,11636,67863,11676,27402,13807,78830,67680,78920,14732,104112,230163,78801,246787,50784,17448,241612,14081,18642,109342,216019,15275,28169,212032,12709,12351,67512,12183,66445,67895,269951,13350,71934
dag_hs_c_13	Diacylglycerol synthesis	45	134	0.335821	0.597784	0	50799,22273,68262,17768,56421,17252,76459,100705,54403,14194,20537,12715,114479,11636,67863,11676,27402,13807,14571,78830,67680,78920,14732,104112,230163,78801,246787,50784,17448,241612,14081,18642,109342,216019,15275,28169,212032,12709,12351,67512,12183,66445,67895,269951,71934
dag_hs_c_53	Diacylglycerol synthesis	45	134	0.335821	0.597784	0	50799,22273,68262,17768,56421,17252,76459,100705,54403,14194,20537,12715,114479,11636,67863,11676,27402,13807,14571,78830,67680,78920,14732,11428,104112,230163,78801,246787,50784,17448,241612,14081,18642,109342,216019,15275,28169,212032,12709,12351,67512,12183,66445,67895,71934
pa_hs_c_34	Phosphatidic acid synthesis	45	134	0.335821	0.597784	0	50799,22273,68262,17768,56421,17252,76459,100705,54403,14194,20537,12715,114479,11636,67863,11676,27402,13807,14571,78830,67680,78920,14732,104112,230163,78801,246787,319848,17448,241612,14081,18642,109342,216019,15275,28169,212032,12709,12351,67512,12183,66445,67895,269951,71934
pa_hs_c_67	Phosphatidic acid synthesis	45	134	0.335821	0.597784	0	50799,22273,68262,17768,56421,15929,17252,76459,100705,54403,14194,20537,12715,11636,67863,11676,27402,13807,14571,78830,67680,78920,14732,20505,104112,230163,78801,246787,17448,241612,14081,18642,109342,216019,15275,20531,28169,212032,12709,12351,67512,12183,66445,67895,71934
tag_hs_c_119	Triacylglycerol synthesis	45	134	0.335821	0.597784	0	50799,22273,68262,67800,17768,56421,17252,76459,100705,14194,20537,12715,11636,67863,11676,27402,13807,14571,78830,67680,78920,14732,11428,104112,230163,78801,246787,50784,17448,241612,14081,18642,109342,216019,15275,28169,212032,12709,12351,67512,12183,66445,67895,13350,71934
tag_hs_c_158	Triacylglycerol synthesis	45	134	0.335821	0.597784	0	50799,22273,69519,68262,67800,56421,17252,76459,100705,54403,14194,20537,12715,11636,67863,11676,27402,13807,78830,67680,78920,14732,104112,230163,78801,246787,50784,17448,241612,14081,18642,109342,216019,15275,28169,212032,12709,12351,67512,12183,66445,67895,269951,13350,71934
tag_hs_c_190	Triacylglycerol synthesis	45	134	0.335821	0.597784	0	50799,22273,68262,218756,67800,56421,17252,76459,100705,14194,20537,12715,11636,67863,11676,27402,13807,78830,67680,78920,14732,14120,104112,230163,78801,246787,50784,17448,241612,14081,18642,109342,216019,15275,28169,212032,12709,12351,67512,12183,66445,67895,269951,13350,71934
tag_hs_c_33	Triacylglycerol synthesis	45	134	0.335821	0.597784	0	50799,22273,68262,67800,17768,56421,17252,76459,100705,14194,20537,12715,11636,67863,11676,27402,13807,14571,78830,67680,78920,14732,11428,104112,230163,78801,246787,50784,17448,241612,14081,18642,109342,216019,15275,28169,212032,12709,12351,67512,12183,66445,67895,13350,71934
tag_hs_c_56	Triacylglycerol synthesis	45	134	0.335821	0.597784	0	50799,22273,69519,68262,67800,56421,76459,100705,54403,20544,14194,20537,12715,11636,67863,11676,27402,13807,78830,67680,78920,14732,104112,230163,78801,246787,50784,17448,241612,14081,18642,109342,216019,15275,28169,212032,12709,12351,67512,12183,66445,67895,269951,13350,71934
tag_hs_c_66	Triacylglycerol synthesis	45	134	0.335821	0.597784	0	50799,22273,68262,67800,17768,56421,17252,76459,100705,14194,20537,12715,114479,11636,67863,11676,27402,13807,14571,78830,67680,78920,14732,11428,104112,230163,107605,78801,246787,50784,17448,14081,18642,216019,15275,28169,212032,12709,12351,67512,12183,66445,67895,13350,71934
tag_hs_c_204	Triacylglycerol synthesis	46	137	0.335766	0.598777	0	50799,22273,68262,67800,17768,56421,15929,17252,76459,100705,14194,12715,11636,67863,11676,27402,13807,14571,78830,67680,78920,14732,104112,230163,107605,78801,246787,50784,17448,241612,14081,18642,109342,216019,15275,28169,212032,12709,12351,67512,12183,16956,66445,67895,13350,71934
pail_hs_c_131	Phosphatidylinositol synthesis	48	143	0.335664	0.600746	0	50799,22273,68262,17768,56421,76459,110446,100705,78894,67041,14194,20537,12715,11636,67863,11676,27402,13807,14571,78830,67680,78920,14732,224530,20505,230163,78801,246787,114663,20515,17448,241612,14081,18642,109342,216019,15275,20531,28169,212032,12709,12351,67512,12183,66445,67895,269951,71934
o2s_m_103	Superoxide anion synthesis	19	57	0.333333	0.606753	0	22273,20537,12715,114479,14571,66171,246787,110208,241612,74419,109342,216019,15275,212032,21881,12709,21351,66445,56847
o2s_m_134	Superoxide anion synthesis	19	57	0.333333	0.606753	0	22273,20537,12715,114479,14571,66171,246787,110208,241612,74419,109342,216019,15275,212032,21881,12709,21351,66445,56847
o2s_m_16	Superoxide anion synthesis	19	57	0.333333	0.606753	0	22273,20537,66194,12715,114479,14571,66171,246787,110208,241612,74419,109342,216019,15275,212032,21881,12709,21351,66445
o2s_m_23	Superoxide anion synthesis	19	57	0.333333	0.606753	0	22273,20537,66194,12715,114479,14571,66171,246787,110208,241612,74419,109342,216019,15275,212032,21881,12709,21351,66445
o2s_m_47	Superoxide anion synthesis	19	57	0.333333	0.606753	0	22273,20537,12715,114479,14571,66171,246787,110208,241612,74419,109342,216019,15275,212032,21881,12709,21351,66445,56847
o2s_m_77	Superoxide anion synthesis	19	57	0.333333	0.606753	0	22273,20537,12715,114479,14571,66171,246787,110208,241612,74419,109342,216019,15275,212032,21881,12709,21351,66445,56847
o2s_m_94	Superoxide anion synthesis	19	57	0.333333	0.606753	0	22273,20537,12715,114479,14571,66171,246787,110208,241612,74419,109342,216019,15275,212032,21881,12709,21351,66445,56847
hdca_c_198	Hexadecanoate synthesis	37	111	0.333333	0.616848	0	50799,22273,56421,15929,110446,100705,54403,78894,67041,14194,20537,12715,11636,67863,11676,27402,13807,78830,67680,78920,224530,11409,230163,78801,246787,17448,14081,18642,216019,15275,212032,12709,78070,12183,57279,66445,67895
hdca_c_230	Hexadecanoate synthesis	37	111	0.333333	0.616848	0	50799,22273,218756,56421,15929,110446,100705,78894,67041,14194,20537,12715,114479,11636,67863,11676,27402,13807,78830,67680,78920,224530,11409,230163,78801,17448,14081,18642,216019,15275,212032,12709,78070,12183,57279,66445,67895
hdca_c_55	Hexadecanoate synthesis	37	111	0.333333	0.616848	0	50799,22273,218756,56421,15929,110446,100705,78894,67041,14194,20537,12715,11636,67863,11676,27402,13807,78830,67680,78920,224530,11409,230163,78801,246787,17448,14081,18642,216019,15275,212032,12709,78070,12183,57279,66445,67895
dag_hs_c_122	Diacylglycerol synthesis	38	114	0.333333	0.61755	0	50799,22273,68262,17768,56421,100705,54403,14194,20537,12715,11636,67863,11676,27402,13807,14571,78830,67680,78920,14732,11428,104112,230163,78801,246787,50784,17448,14081,18642,216019,15275,28169,212032,12709,67512,12183,66445,67895
dag_hs_c_152	Diacylglycerol synthesis	39	117	0.333333	0.618258	0	50799,22273,68262,218756,17768,56421,100705,54403,20544,14194,20537,12715,11636,67863,11676,27402,13807,14571,78830,67680,78920,14732,11428,104112,230163,78801,50784,17448,14081,18642,216019,15275,28169,212032,12709,67512,12183,66445,67895
dag_hs_c_228	Diacylglycerol synthesis	39	117	0.333333	0.618258	0	50799,22273,68262,17768,56421,17252,100705,54403,14194,20537,12715,11636,67863,11676,27402,13807,14571,78830,67680,78920,14732,11428,104112,230163,78801,246787,50784,17448,14081,18642,216019,15275,28169,212032,12709,67512,12183,66445,67895
dag_hs_c_96	Diacylglycerol synthesis	39	117	0.333333	0.618258	0	50799,22273,68262,218756,17768,56421,100705,54403,20544,14194,20537,12715,11636,67863,11676,27402,13807,14571,78830,67680,78920,14732,104112,230163,78801,50784,17448,14081,18642,216019,15275,28169,212032,12709,67512,12183,66445,67895,269951
hdca_c_212	Hexadecanoate synthesis	39	117	0.333333	0.618258	0	50799,22273,56421,15929,110446,100705,54403,78894,67041,14194,20537,12715,11636,67863,11676,27402,13807,78830,67680,78920,224530,11409,230163,78801,246787,17448,241612,14081,18642,109342,216019,15275,212032,12709,78070,12183,57279,66445,67895
pa_hs_c_82	Phosphatidic acid synthesis	39	117	0.333333	0.618258	0	50799,22273,68262,17768,56421,17252,100705,54403,14194,20537,12715,11636,67863,11676,27402,13807,14571,78830,67680,78920,14732,11428,104112,230163,78801,246787,319848,17448,14081,18642,216019,15275,28169,212032,12709,67512,12183,66445,67895
dag_hs_c_126	Diacylglycerol synthesis	40	120	0.333333	0.618972	0	50799,22273,68262,17768,56421,76459,100705,14194,20537,12715,11636,67863,11676,27402,13807,14571,78830,67680,78920,14732,104112,230163,78801,246787,50784,17448,14081,18642,216019,15275,28169,212032,12709,12351,67512,12183,66445,67895,269951,71934
dag_hs_c_129	Diacylglycerol synthesis	40	120	0.333333	0.618972	0	50799,22273,68262,17768,56421,100705,54403,20544,14194,20537,12715,114479,11636,67863,11676,27402,13807,14571,78830,67680,78920,14732,104112,230163,78801,246787,50784,17448,14081,18642,216019,15275,28169,212032,12709,67512,12183,66445,67895,269951
hdca_c_148	Hexadecanoate synthesis	40	120	0.333333	0.618972	0	50799,22273,56421,15929,110446,100705,54403,78894,67041,20544,14194,20537,12715,11636,67863,11676,27402,13807,78830,67680,78920,224530,11409,230163,78801,246787,17448,241612,14081,18642,109342,216019,15275,212032,12709,78070,12183,57279,66445,67895
hdca_c_243	Hexadecanoate synthesis	40	120	0.333333	0.618972	0	50799,22273,218756,56421,15929,110446,100705,78894,67041,20544,14194,20537,12715,11636,67863,11676,27402,13807,78830,67680,78920,224530,11409,230163,78801,246787,17448,241612,14081,18642,109342,216019,15275,212032,12709,78070,12183,57279,66445,67895
pa_hs_c_150	Phosphatidic acid synthesis	40	120	0.333333	0.618972	0	50799,22273,68262,218756,17768,56421,15929,17252,100705,54403,14194,20537,12715,11636,67863,11676,27402,13807,14571,78830,67680,78920,14732,104112,230163,107605,78801,246787,17448,14081,18642,216019,15275,28169,212032,12709,67512,12183,66445,67895
pa_hs_c_31	Phosphatidic acid synthesis	40	120	0.333333	0.618972	0	50799,22273,68262,17768,56421,76459,100705,54403,14194,20537,12715,11636,67863,11676,27402,13807,14571,78830,67680,78920,14732,104112,230163,78801,20515,17448,14081,18642,216019,15275,28169,212032,12709,12351,67512,12183,66445,67895,269951,71934
tag_hs_c_243	Triacylglycerol synthesis	40	120	0.333333	0.618972	0	50799,22273,68262,67800,17768,56421,100705,54403,20544,14194,20537,12715,11636,67863,11676,27402,13807,14571,78830,67680,78920,14732,104112,230163,78801,50784,17448,14081,18642,216019,15275,28169,212032,12709,67512,12183,66445,67895,269951,13350
dag_hs_c_101	Diacylglycerol synthesis	41	123	0.333333	0.61969	0	50799,22273,68262,218756,17768,56421,76459,100705,54403,14194,20537,12715,11636,67863,11676,27402,13807,14571,78830,67680,78920,14732,104112,230163,78801,50784,17448,14081,18642,216019,15275,28169,212032,12709,12351,67512,12183,66445,67895,269951,71934
dag_hs_c_199	Diacylglycerol synthesis	41	123	0.333333	0.61969	0	50799,22273,68262,17768,56421,76459,100705,54403,14194,20537,12715,114479,11636,67863,11676,27402,13807,14571,78830,67680,78920,14732,104112,230163,78801,50784,17448,14081,18642,216019,15275,28169,212032,12709,12351,67512,12183,66445,67895,269951,71934
hdca_c_226	Hexadecanoate synthesis	41	123	0.333333	0.61969	0	50799,22273,56421,15929,76459,110446,100705,54403,78894,67041,14194,12715,11636,67863,11676,27402,13807,78830,67680,78920,224530,11409,230163,78801,246787,17448,241612,14081,18642,109342,216019,15275,212032,12709,12351,78070,12183,57279,66445,67895,71934
hdca_c_263	Hexadecanoate synthesis	41	123	0.333333	0.61969	0	50799,22273,56421,15929,76459,110446,100705,54403,78894,67041,14194,12715,11636,67863,11676,27402,13807,78830,67680,78920,224530,11409,230163,78801,246787,17448,241612,14081,18642,109342,216019,15275,212032,12709,12351,78070,12183,57279,66445,67895,71934
hdca_c_71	Hexadecanoate synthesis	41	123	0.333333	0.61969	0	50799,22273,56421,15929,76459,110446,100705,78894,67041,14194,20537,12715,11636,67863,11676,27402,13807,78830,67680,78920,224530,11409,230163,78801,246787,17448,241612,14081,18642,109342,216019,15275,212032,12709,12351,78070,12183,57279,66445,67895,71934
pa_hs_c_177	Phosphatidic acid synthesis	41	123	0.333333	0.61969	0	50799,22273,68262,17768,56421,17252,100705,54403,14194,20537,12715,11636,67863,11676,27402,13807,14571,78830,67680,78920,14732,11428,104112,230163,78801,246787,20515,17448,241612,14081,18642,109342,216019,15275,28169,212032,12709,67512,12183,66445,67895
pa_hs_c_60	Phosphatidic acid synthesis	41	123	0.333333	0.61969	0	50799,22273,68262,17768,56421,76459,100705,14194,12715,11636,67863,11676,27402,13807,14571,78830,67680,78920,14732,11428,104112,230163,78801,246787,20515,17448,241612,14081,18642,109342,216019,15275,28169,212032,12709,12351,67512,12183,66445,67895,71934
tag_hs_c_205	Triacylglycerol synthesis	41	123	0.333333	0.61969	0	50799,22273,68262,67800,56421,100705,54403,20544,14194,12715,11636,67863,11676,27402,13807,78830,67680,78920,14732,14120,104112,230163,78801,246787,50784,17448,241612,14081,18642,109342,216019,15275,28169,212032,12709,67512,12183,66445,67895,269951,13350
tag_hs_c_209	Triacylglycerol synthesis	41	123	0.333333	0.61969	0	50799,22273,68262,218756,67800,17768,56421,15929,17252,100705,14194,20537,12715,11636,67863,11676,27402,13807,14571,78830,67680,78920,14732,104112,230163,78801,246787,50784,17448,14081,18642,216019,15275,28169,212032,12709,67512,12183,66445,67895,13350
tag_hs_c_84	Triacylglycerol synthesis	41	123	0.333333	0.61969	0	50799,22273,69519,68262,67800,56421,100705,54403,20544,14194,12715,11636,67863,11676,27402,13807,78830,67680,78920,14732,104112,230163,78801,246787,50784,17448,241612,14081,18642,109342,216019,15275,28169,212032,12709,67512,12183,66445,67895,269951,13350
dag_hs_c_105	Diacylglycerol synthesis	42	126	0.333333	0.620413	0	50799,22273,68262,17768,56421,15929,76459,100705,14194,20537,12715,11636,67863,11676,27402,13807,14571,78830,67680,78920,14732,104112,230163,78801,246787,50784,17448,241612,14081,18642,109342,216019,15275,28169,212032,12709,12351,67512,12183,66445,67895,71934
dag_hs_c_124	Diacylglycerol synthesis	42	126	0.333333	0.620413	0	50799,22273,68262,17768,56421,76459,100705,54403,14194,12715,11636,67863,11676,27402,13807,14571,78830,67680,78920,14732,104112,230163,78801,246787,50784,17448,241612,14081,18642,109342,216019,15275,28169,212032,12709,12351,67512,12183,66445,67895,269951,71934
dag_hs_c_131	Diacylglycerol synthesis	42	126	0.333333	0.620413	0	50799,22273,68262,17768,56421,76459,100705,54403,14194,12715,11636,67863,11676,27402,13807,14571,78830,67680,78920,14732,11428,104112,230163,78801,246787,50784,17448,241612,14081,18642,109342,216019,15275,28169,212032,12709,12351,67512,12183,66445,67895,71934
dag_hs_c_164	Diacylglycerol synthesis	42	126	0.333333	0.620413	0	50799,22273,68262,17768,56421,76459,100705,14194,20537,12715,11636,67863,11676,27402,13807,14571,78830,67680,78920,14732,11428,104112,230163,78801,246787,50784,17448,241612,14081,18642,109342,216019,15275,28169,212032,12709,12351,67512,12183,66445,67895,71934
dag_hs_c_175	Diacylglycerol synthesis	42	126	0.333333	0.620413	0	50799,22273,68262,17768,56421,76459,100705,54403,14194,12715,11636,67863,11676,27402,13807,14571,78830,67680,78920,14732,11428,104112,230163,78801,246787,50784,17448,241612,14081,18642,109342,216019,15275,28169,212032,12709,12351,67512,12183,66445,67895,71934
dag_hs_c_176	Diacylglycerol synthesis	42	126	0.333333	0.620413	0	50799,22273,68262,17768,56421,76459,100705,14194,20537,12715,11636,67863,11676,27402,13807,14571,78830,67680,78920,14732,11428,104112,230163,78801,246787,50784,17448,241612,14081,18642,109342,216019,15275,28169,212032,12709,12351,67512,12183,66445,67895,71934
dag_hs_c_180	Diacylglycerol synthesis	42	126	0.333333	0.620413	0	50799,22273,68262,17768,56421,76459,100705,14194,20537,12715,11636,67863,11676,27402,13807,14571,78830,67680,78920,14732,104112,230163,78801,246787,50784,17448,241612,14081,18642,109342,216019,15275,28169,212032,12709,12351,67512,12183,66445,67895,269951,71934
dag_hs_c_188	Diacylglycerol synthesis	42	126	0.333333	0.620413	0	50799,22273,68262,17768,56421,76459,100705,14194,20537,12715,11636,67863,11676,27402,13807,14571,78830,67680,78920,14732,104112,230163,78801,246787,50784,17448,241612,14081,18642,109342,216019,15275,28169,212032,12709,12351,67512,12183,66445,67895,269951,71934
dag_hs_c_31	Diacylglycerol synthesis	42	126	0.333333	0.620413	0	50799,22273,68262,17768,56421,15929,17252,100705,54403,14194,20537,12715,114479,11636,67863,11676,27402,13807,14571,78830,67680,78920,14732,104112,230163,78801,246787,50784,17448,241612,14081,18642,109342,216019,15275,28169,212032,12709,67512,12183,66445,67895
dag_hs_c_34	Diacylglycerol synthesis	42	126	0.333333	0.620413	0	50799,22273,68262,17768,56421,17252,76459,100705,54403,14194,20537,12715,114479,11636,67863,11676,27402,13807,14571,78830,67680,78920,14732,104112,230163,78801,50784,17448,14081,18642,216019,15275,28169,212032,12709,12351,67512,12183,66445,67895,269951,71934
dag_hs_c_47	Diacylglycerol synthesis	42	126	0.333333	0.620413	0	50799,22273,68262,17768,56421,17252,76459,100705,54403,14194,20537,12715,114479,11636,67863,11676,27402,13807,14571,78830,67680,78920,14732,104112,230163,78801,50784,17448,14081,18642,216019,15275,28169,212032,12709,12351,67512,12183,66445,67895,269951,71934
dag_hs_c_74	Diacylglycerol synthesis	42	126	0.333333	0.620413	0	50799,22273,68262,17768,56421,76459,100705,54403,14194,12715,11636,67863,11676,27402,13807,14571,78830,67680,78920,14732,11428,104112,230163,78801,246787,50784,17448,241612,14081,18642,109342,216019,15275,28169,212032,12709,12351,67512,12183,66445,67895,71934
dag_hs_c_87	Diacylglycerol synthesis	42	126	0.333333	0.620413	0	50799,22273,68262,218756,17768,56421,17252,76459,100705,54403,14194,20537,12715,11636,67863,11676,27402,13807,14571,78830,67680,78920,14732,104112,230163,78801,50784,17448,14081,18642,216019,15275,28169,212032,12709,12351,67512,12183,66445,67895,269951,71934
hdca_c_103	Hexadecanoate synthesis	42	126	0.333333	0.620413	0	50799,22273,218756,56421,15929,76459,110446,100705,78894,67041,14194,20537,12715,11636,67863,11676,27402,13807,78830,67680,78920,224530,11409,230163,78801,246787,17448,241612,14081,18642,109342,216019,15275,212032,12709,12351,78070,12183,57279,66445,67895,71934
hdca_c_193	Hexadecanoate synthesis	42	126	0.333333	0.620413	0	50799,22273,218756,56421,15929,76459,110446,100705,54403,78894,67041,14194,12715,11636,67863,11676,27402,13807,78830,67680,78920,224530,11409,230163,78801,246787,17448,241612,14081,18642,109342,216019,15275,212032,12709,12351,78070,12183,57279,66445,67895,71934
hdca_c_93	Hexadecanoate synthesis	42	126	0.333333	0.620413	0	50799,22273,56421,15929,76459,110446,100705,54403,78894,67041,14194,20537,12715,11636,67863,11676,27402,13807,78830,67680,78920,224530,11409,230163,78801,246787,17448,241612,14081,18642,109342,216019,15275,212032,12709,12351,78070,12183,57279,66445,67895,71934
pa_hs_c_156	Phosphatidic acid synthesis	42	126	0.333333	0.620413	0	50799,22273,68262,218756,17768,56421,76459,100705,14194,12715,11636,67863,11676,27402,13807,14571,78830,67680,78920,14732,104112,230163,78801,246787,319848,17448,241612,14081,18642,109342,216019,15275,28169,212032,12709,12351,67512,12183,66445,67895,269951,71934
pa_hs_c_159	Phosphatidic acid synthesis	42	126	0.333333	0.620413	0	50799,22273,68262,17768,56421,17252,76459,100705,14194,20537,12715,11636,67863,11676,27402,13807,14571,78830,67680,78920,14732,20505,104112,230163,78801,20515,17448,14081,18642,216019,15275,20531,28169,212032,12709,12351,67512,12183,66445,67895,269951,71934
pa_hs_c_202	Phosphatidic acid synthesis	42	126	0.333333	0.620413	0	50799,22273,68262,17768,56421,76459,100705,54403,14194,12715,11636,67863,11676,27402,13807,14571,78830,67680,78920,14732,104112,230163,78801,246787,20515,17448,241612,14081,18642,109342,216019,15275,28169,212032,12709,12351,67512,12183,66445,67895,269951,71934
pa_hs_c_4	Phosphatidic acid synthesis	42	126	0.333333	0.620413	0	50799,22273,68262,17768,56421,15929,76459,100705,54403,14194,12715,11636,67863,11676,27402,13807,14571,78830,67680,78920,14732,104112,230163,78801,246787,20515,17448,241612,14081,18642,109342,216019,15275,28169,212032,12709,12351,67512,12183,66445,67895,71934
pa_hs_c_44	Phosphatidic acid synthesis	42	126	0.333333	0.620413	0	50799,22273,68262,17768,56421,15929,76459,100705,54403,14194,12715,11636,67863,11676,27402,13807,14571,78830,67680,78920,14732,104112,230163,78801,246787,20515,17448,241612,14081,18642,109342,216019,15275,28169,212032,12709,12351,67512,12183,66445,67895,71934
pa_hs_c_83	Phosphatidic acid synthesis	42	126	0.333333	0.620413	0	50799,22273,68262,17768,56421,15929,76459,100705,54403,14194,12715,11636,67863,11676,27402,13807,14571,78830,67680,78920,14732,104112,230163,78801,246787,20515,17448,241612,14081,18642,109342,216019,15275,28169,212032,12709,12351,67512,12183,66445,67895,71934
pail_hs_c_83	Phosphatidylinositol synthesis	42	126	0.333333	0.620413	0	50799,22273,68262,17768,56421,15929,110446,100705,54403,78894,67041,14194,20537,12715,11636,67863,11676,27402,13807,14571,78830,67680,78920,14732,224530,20505,230163,78801,114663,17448,14081,18642,216019,15275,20531,28169,212032,12709,67512,12183,66445,67895
tag_hs_c_241	Triacylglycerol synthesis	42	126	0.333333	0.620413	0	50799,22273,68262,67800,17768,56421,76459,100705,20544,14194,20537,12715,11636,67863,11676,27402,13807,14571,78830,67680,78920,14732,104112,230163,78801,50784,17448,14081,18642,216019,15275,28169,212032,12709,12351,67512,12183,66445,67895,269951,13350,71934
dag_hs_c_153	Diacylglycerol synthesis	43	129	0.333333	0.62114	0	50799,22273,68262,17768,56421,17252,76459,100705,14194,20537,12715,11636,67863,11676,27402,13807,14571,78830,67680,78920,14732,11428,104112,230163,78801,246787,50784,17448,241612,14081,18642,109342,216019,15275,28169,212032,12709,12351,67512,12183,66445,67895,71934
dag_hs_c_198	Diacylglycerol synthesis	43	129	0.333333	0.62114	0	50799,22273,68262,17768,56421,15929,76459,100705,54403,14194,20537,12715,11636,67863,11676,27402,13807,14571,78830,67680,78920,14732,104112,230163,78801,246787,50784,17448,241612,14081,18642,109342,216019,15275,28169,212032,12709,12351,67512,12183,66445,67895,71934
dag_hs_c_20	Diacylglycerol synthesis	43	129	0.333333	0.62114	0	50799,22273,68262,17768,56421,76459,100705,20544,14194,20537,12715,11636,67863,11676,27402,13807,14571,78830,67680,78920,14732,11428,104112,230163,78801,246787,50784,17448,241612,14081,18642,109342,216019,15275,28169,212032,12709,12351,67512,12183,66445,67895,71934
dag_hs_c_204	Diacylglycerol synthesis	43	129	0.333333	0.62114	0	50799,22273,68262,17768,56421,17252,76459,100705,54403,14194,12715,11636,67863,11676,27402,13807,14571,78830,67680,78920,14732,104112,230163,78801,246787,50784,17448,241612,14081,18642,109342,216019,15275,28169,212032,12709,12351,67512,12183,66445,67895,269951,71934
dag_hs_c_28	Diacylglycerol synthesis	43	129	0.333333	0.62114	0	50799,22273,68262,17768,56421,15929,17252,76459,100705,14194,20537,12715,11636,67863,11676,27402,13807,14571,78830,67680,78920,14732,104112,230163,78801,246787,50784,17448,241612,14081,18642,109342,216019,15275,28169,212032,12709,12351,67512,12183,66445,67895,71934
hdca_c_138	Hexadecanoate synthesis	43	129	0.333333	0.62114	0	50799,22273,218756,56421,15929,17252,76459,110446,100705,78894,67041,14194,20537,12715,11636,67863,11676,27402,13807,78830,67680,78920,224530,11409,230163,78801,246787,17448,241612,14081,18642,109342,216019,15275,212032,12709,12351,78070,12183,57279,66445,67895,71934
hdca_c_219	Hexadecanoate synthesis	43	129	0.333333	0.62114	0	50799,22273,56421,15929,76459,110446,100705,54403,78894,67041,14194,20537,12715,114479,11636,67863,11676,27402,13807,78830,67680,78920,224530,11409,230163,78801,246787,17448,241612,14081,18642,109342,216019,15275,212032,12709,12351,78070,12183,57279,66445,67895,71934
pa_hs_c_12	Phosphatidic acid synthesis	43	129	0.333333	0.62114	0	50799,22273,68262,17768,56421,17252,100705,54403,20544,14194,20537,12715,114479,11636,67863,11676,27402,13807,14571,78830,67680,78920,14732,104112,230163,78801,246787,20515,17448,241612,14081,18642,109342,216019,15275,28169,212032,12709,67512,12183,66445,67895,269951
pa_hs_c_190	Phosphatidic acid synthesis	43	129	0.333333	0.62114	0	50799,22273,68262,218756,17768,56421,15929,17252,76459,100705,14194,20537,12715,11636,67863,11676,27402,13807,14571,78830,67680,78920,14732,104112,230163,78801,246787,17448,241612,14081,18642,109342,216019,15275,28169,212032,12709,12351,67512,12183,66445,67895,71934
pa_hs_c_237	Phosphatidic acid synthesis	43	129	0.333333	0.62114	0	50799,22273,68262,17768,56421,15929,76459,100705,54403,14194,20537,12715,11636,67863,11676,27402,13807,14571,78830,67680,78920,14732,104112,230163,78801,246787,20515,17448,241612,14081,18642,109342,216019,15275,28169,212032,12709,12351,67512,12183,66445,67895,71934
pa_hs_c_243	Phosphatidic acid synthesis	43	129	0.333333	0.62114	0	50799,22273,68262,218756,17768,56421,15929,76459,100705,54403,14194,12715,11636,67863,11676,27402,13807,14571,78830,67680,78920,14732,104112,230163,78801,246787,20515,17448,241612,14081,18642,109342,216019,15275,28169,212032,12709,12351,67512,12183,66445,67895,71934
pail_hs_c_222	Phosphatidylinositol synthesis	43	129	0.333333	0.62114	0	50799,22273,68262,56421,15929,100705,54403,14194,20537,12715,11636,67863,11676,27402,13807,78830,67680,78920,14732,11409,104112,230163,78801,246787,114663,20515,17448,241612,14081,18642,109342,216019,15275,28169,212032,12709,78070,67512,12183,57279,66445,67895,269951
tag_hs_c_105	Triacylglycerol synthesis	43	129	0.333333	0.62114	0	50799,22273,68262,67800,56421,76459,100705,54403,14194,20537,12715,11636,67863,11676,27402,13807,78830,67680,78920,14732,104112,230163,78801,246787,50784,17448,241612,14081,18642,109342,216019,15275,28169,212032,12709,12351,67512,12183,66445,67895,269951,13350,71934
tag_hs_c_184	Triacylglycerol synthesis	43	129	0.333333	0.62114	0	50799,22273,69519,68262,218756,67800,56421,76459,100705,54403,14194,20537,12715,11636,67863,11676,27402,13807,78830,67680,78920,14732,104112,230163,78801,246787,50784,17448,14081,18642,216019,15275,28169,212032,12709,12351,67512,12183,66445,67895,269951,13350,71934
tag_hs_c_195	Triacylglycerol synthesis	43	129	0.333333	0.62114	0	50799,22273,69519,68262,67800,56421,76459,100705,54403,20544,14194,20537,12715,114479,11636,67863,11676,27402,13807,78830,67680,78920,14732,104112,230163,78801,50784,17448,14081,18642,216019,15275,28169,212032,12709,12351,67512,12183,66445,67895,269951,13350,71934
tag_hs_c_89	Triacylglycerol synthesis	43	129	0.333333	0.62114	0	50799,22273,69519,68262,67800,56421,76459,100705,54403,20544,14194,20537,12715,114479,11636,67863,11676,27402,13807,78830,67680,78920,14732,104112,230163,78801,50784,17448,14081,18642,216019,15275,28169,212032,12709,12351,67512,12183,66445,67895,269951,13350,71934
dag_hs_c_156	Diacylglycerol synthesis	44	132	0.333333	0.62187	0	50799,22273,68262,17768,56421,17252,76459,100705,14194,20537,12715,114479,11636,67863,11676,27402,13807,14571,78830,67680,78920,14732,11428,104112,230163,78801,246787,50784,17448,241612,14081,18642,109342,216019,15275,28169,212032,12709,12351,67512,12183,66445,67895,71934
dag_hs_c_43	Diacylglycerol synthesis	44	132	0.333333	0.62187	0	50799,22273,68262,17768,56421,17252,76459,100705,54403,14194,20537,12715,11636,67863,11676,27402,13807,14571,78830,67680,78920,14732,104112,230163,78801,246787,50784,17448,241612,14081,18642,109342,216019,15275,28169,212032,12709,12351,67512,12183,66445,67895,269951,71934
hdca_c_132	Hexadecanoate synthesis	44	132	0.333333	0.62187	0	50799,22273,218756,56421,15929,17252,76459,110446,100705,78894,67041,14194,20537,12715,11636,67863,11676,27402,13807,78830,67680,78920,224530,11409,230163,107605,78801,246787,17448,241612,14081,18642,109342,216019,15275,212032,12709,12351,78070,12183,57279,66445,67895,71934
hdca_c_173	Hexadecanoate synthesis	44	132	0.333333	0.62187	0	50799,22273,56421,15929,17252,76459,110446,100705,54403,78894,67041,14194,20537,12715,114479,11636,67863,11676,27402,13807,78830,67680,78920,224530,11409,230163,78801,246787,17448,241612,14081,18642,109342,216019,15275,212032,12709,12351,78070,12183,57279,66445,67895,71934
pa_hs_c_105	Phosphatidic acid synthesis	44	132	0.333333	0.62187	0	50799,22273,68262,17768,56421,15929,17252,76459,100705,14194,20537,12715,11636,67863,11676,27402,13807,14571,78830,67680,78920,14732,20505,104112,230163,107605,78801,246787,20515,17448,14081,18642,216019,15275,20531,28169,212032,12709,12351,67512,12183,66445,67895,71934
pa_hs_c_11	Phosphatidic acid synthesis	44	132	0.333333	0.62187	0	50799,22273,68262,218756,17768,56421,17252,76459,100705,14194,20537,12715,11636,67863,11676,27402,13807,14571,78830,67680,78920,14732,104112,230163,78801,246787,319848,17448,241612,14081,18642,109342,216019,15275,28169,212032,12709,12351,67512,12183,66445,67895,269951,71934
pa_hs_c_137	Phosphatidic acid synthesis	44	132	0.333333	0.62187	0	50799,22273,68262,17768,56421,17252,76459,100705,54403,14194,20537,12715,11636,67863,11676,27402,13807,14571,78830,67680,78920,14732,104112,230163,78801,246787,319848,17448,241612,14081,18642,109342,216019,15275,28169,212032,12709,12351,67512,12183,66445,67895,269951,71934
pa_hs_c_161	Phosphatidic acid synthesis	44	132	0.333333	0.62187	0	50799,22273,68262,17768,56421,17252,76459,100705,54403,14194,20537,12715,11636,67863,11676,27402,13807,14571,78830,67680,78920,14732,11428,104112,230163,78801,246787,20515,17448,241612,14081,18642,109342,216019,15275,28169,212032,12709,12351,67512,12183,66445,67895,71934
pa_hs_c_172	Phosphatidic acid synthesis	44	132	0.333333	0.62187	0	50799,22273,68262,17768,56421,17252,76459,100705,14194,12715,11636,67863,11676,27402,13807,14571,78830,67680,78920,14732,11428,20505,104112,230163,78801,246787,20515,17448,241612,14081,18642,109342,216019,15275,20531,28169,212032,12709,12351,67512,12183,66445,67895,71934
pa_hs_c_205	Phosphatidic acid synthesis	44	132	0.333333	0.62187	0	50799,22273,68262,17768,56421,17252,76459,100705,14194,20537,12715,11636,67863,11676,27402,13807,14571,78830,67680,78920,14732,11428,20505,104112,230163,78801,246787,17448,241612,14081,18642,109342,216019,15275,20531,28169,212032,12709,12351,67512,12183,66445,67895,71934
pa_hs_c_3	Phosphatidic acid synthesis	44	132	0.333333	0.62187	0	50799,22273,68262,17768,56421,17252,76459,100705,54403,14194,20537,12715,11636,67863,11676,27402,13807,14571,78830,67680,78920,14732,104112,230163,78801,246787,20515,17448,241612,14081,18642,109342,216019,15275,28169,212032,12709,12351,67512,12183,66445,67895,269951,71934
pa_hs_c_53	Phosphatidic acid synthesis	44	132	0.333333	0.62187	0	50799,22273,68262,17768,56421,17252,76459,100705,54403,14194,12715,11636,67863,11676,27402,13807,14571,78830,67680,78920,14732,11428,20505,104112,230163,78801,246787,17448,241612,14081,18642,109342,216019,15275,20531,28169,212032,12709,12351,67512,12183,66445,67895,71934
tag_hs_c_172	Triacylglycerol synthesis	44	132	0.333333	0.62187	0	50799,22273,68262,218756,67800,56421,76459,100705,20544,14194,20537,12715,11636,67863,11676,27402,13807,78830,67680,78920,14732,104112,230163,78801,246787,50784,17448,241612,14081,18642,109342,216019,15275,28169,212032,12709,12351,67512,12183,66445,67895,269951,13350,71934
tag_hs_c_104	Triacylglycerol synthesis	45	135	0.333333	0.622604	0	50799,22273,68262,67800,17768,56421,17252,76459,100705,54403,14194,12715,11636,67863,11676,27402,13807,14571,78830,67680,78920,14732,11428,104112,230163,78801,246787,50784,17448,241612,14081,18642,109342,216019,15275,28169,212032,12709,12351,67512,12183,66445,67895,13350,71934
tag_hs_c_163	Triacylglycerol synthesis	45	135	0.333333	0.622604	0	50799,22273,68262,218756,67800,56421,17252,76459,100705,14194,20537,12715,114479,11636,67863,11676,27402,13807,78830,67680,78920,14732,104112,230163,78801,246787,50784,17448,241612,14081,18642,109342,216019,15275,28169,212032,12709,12351,67512,12183,66445,67895,269951,13350,71934
tag_hs_c_169	Triacylglycerol synthesis	45	135	0.333333	0.622604	0	50799,22273,68262,218756,67800,17768,56421,15929,17252,76459,100705,14194,12715,11636,67863,11676,27402,13807,14571,78830,67680,78920,14732,104112,230163,78801,246787,50784,17448,241612,14081,18642,109342,216019,15275,28169,212032,12709,12351,67512,12183,66445,67895,13350,71934
tag_hs_c_197	Triacylglycerol synthesis	45	135	0.333333	0.622604	0	50799,22273,68262,67800,17768,56421,15929,17252,76459,100705,54403,14194,12715,11636,67863,11676,27402,13807,14571,78830,67680,78920,14732,104112,230163,78801,246787,50784,17448,241612,14081,18642,109342,216019,15275,28169,212032,12709,12351,67512,12183,66445,67895,13350,71934
tag_hs_c_27	Triacylglycerol synthesis	45	135	0.333333	0.622604	0	50799,22273,68262,218756,67800,56421,17252,76459,100705,54403,14194,20537,12715,11636,67863,11676,27402,13807,78830,67680,78920,14732,104112,230163,78801,246787,50784,17448,241612,14081,18642,109342,216019,15275,28169,212032,12709,12351,67512,12183,66445,67895,269951,13350,71934
tag_hs_c_46	Triacylglycerol synthesis	45	135	0.333333	0.622604	0	50799,22273,68262,67800,56421,17252,76459,100705,54403,14194,20537,12715,11636,67863,11676,27402,13807,78830,67680,78920,14732,14120,104112,230163,78801,246787,50784,17448,241612,14081,18642,109342,216019,15275,28169,212032,12709,12351,67512,12183,66445,67895,269951,13350,71934
tag_hs_c_96	Triacylglycerol synthesis	45	135	0.333333	0.622604	0	50799,22273,68262,67800,17768,56421,17252,76459,100705,20544,14194,20537,12715,114479,11636,67863,11676,27402,13807,14571,78830,67680,78920,14732,104112,230163,78801,246787,50784,17448,14081,18642,216019,15275,28169,212032,12709,12351,67512,12183,66445,67895,269951,13350,71934
tag_hs_c_165	Triacylglycerol synthesis	46	138	0.333333	0.62334	0	50799,22273,69519,68262,67800,56421,17252,76459,100705,54403,20544,14194,20537,12715,11636,67863,11676,27402,13807,78830,67680,78920,14732,104112,230163,78801,246787,50784,17448,241612,14081,18642,109342,216019,15275,28169,212032,12709,12351,67512,12183,66445,67895,269951,13350,71934
tag_hs_c_176	Triacylglycerol synthesis	46	138	0.333333	0.62334	0	50799,22273,68262,67800,17768,56421,17252,76459,100705,20544,14194,20537,12715,11636,67863,11676,27402,13807,14571,78830,67680,78920,14732,11428,104112,230163,78801,246787,50784,17448,241612,14081,18642,109342,216019,15275,28169,212032,12709,12351,67512,12183,66445,67895,13350,71934
tag_hs_c_234	Triacylglycerol synthesis	46	138	0.333333	0.62334	0	50799,22273,69519,68262,67800,56421,17252,76459,100705,54403,14194,20537,12715,114479,11636,67863,11676,27402,13807,78830,67680,78920,14732,104112,230163,78801,246787,50784,17448,241612,14081,18642,109342,216019,15275,28169,212032,12709,12351,67512,12183,66445,67895,269951,13350,71934
tag_hs_c_97	Triacylglycerol synthesis	46	138	0.333333	0.62334	0	50799,22273,68262,67800,17768,56421,15929,17252,76459,100705,54403,14194,12715,11636,67863,11676,27402,13807,14571,78830,67680,78920,14732,104112,230163,107605,78801,246787,50784,17448,241612,14081,18642,109342,216019,15275,28169,212032,12709,12351,67512,12183,66445,67895,13350,71934
pail_hs_c_112	Phosphatidylinositol synthesis	47	141	0.333333	0.624079	0	50799,22273,68262,17768,56421,76459,110446,100705,78894,67041,14194,20537,12715,114479,11636,67863,11676,27402,13807,14571,78830,67680,78920,14732,224530,230163,78801,246787,114663,20515,17448,241612,14081,18642,109342,216019,15275,28169,212032,12709,12351,67512,12183,66445,67895,269951,71934
pail_hs_c_37	Phosphatidylinositol synthesis	48	144	0.333333	0.62482	0	50799,22273,68262,56421,15929,17252,76459,100705,54403,14194,20537,12715,11636,67863,11676,27402,13807,78830,67680,78920,14732,11409,20505,104112,230163,78801,246787,114663,17448,241612,14081,18642,109342,216019,15275,20531,28169,212032,12709,12351,78070,67512,12183,57279,66445,67895,269951,71934
pail_hs_c_1	Phosphatidylinositol synthesis	49	147	0.333333	0.625563	0	50799,22273,68262,17768,56421,17252,76459,110446,100705,54403,78894,67041,14194,20537,12715,114479,11636,67863,11676,27402,13807,14571,78830,67680,78920,14732,224530,230163,78801,246787,114663,20515,17448,241612,14081,18642,109342,216019,15275,28169,212032,12709,12351,67512,12183,66445,67895,269951,71934
pail_hs_c_70	Phosphatidylinositol synthesis	49	147	0.333333	0.625563	0	50799,22273,68262,218756,17768,56421,17252,76459,110446,100705,54403,78894,67041,20544,14194,12715,11636,67863,11676,27402,13807,14571,78830,67680,78920,14732,224530,230163,78801,246787,114663,20515,17448,241612,14081,18642,109342,216019,15275,28169,212032,12709,12351,67512,12183,66445,67895,269951,71934
pa_hs_c_74	Phosphatidic acid synthesis	36	109	0.330275	0.642989	0	50799,22273,68262,56421,100705,54403,14194,20537,12715,11636,67863,11676,27402,13807,78830,67680,78920,14732,104112,230163,78801,246787,319848,17448,14081,18642,216019,15275,28169,212032,12709,67512,12183,66445,67895,269951
dag_hs_c_201	Diacylglycerol synthesis	37	112	0.330357	0.643345	0	50799,22273,68262,17768,56421,100705,54403,14194,20537,12715,11636,67863,11676,27402,13807,14571,78830,67680,78920,14732,104112,230163,78801,50784,17448,14081,18642,216019,15275,28169,212032,12709,67512,12183,66445,67895,269951
hdca_c_232	Hexadecanoate synthesis	37	112	0.330357	0.643345	0	50799,22273,56421,15929,110446,100705,54403,78894,67041,14194,20537,12715,114479,11636,67863,11676,27402,13807,78830,67680,78920,224530,11409,230163,78801,17448,14081,18642,216019,15275,212032,12709,78070,12183,57279,66445,67895
o2s_m_140	Superoxide anion synthesis	18	55	0.327273	0.643518	0	22273,20537,12715,114479,14571,66171,246787,110208,241612,74419,109342,216019,15275,212032,21881,12709,21351,66445
o2s_m_3	Superoxide anion synthesis	18	55	0.327273	0.643518	0	22273,20537,12715,114479,14571,66171,246787,110208,241612,74419,109342,216019,15275,212032,21881,12709,21351,66445
o2s_m_33	Superoxide anion synthesis	18	55	0.327273	0.643518	0	22273,20537,12715,114479,14571,66171,246787,110208,241612,74419,109342,216019,15275,212032,21881,12709,21351,66445
dag_hs_c_41	Diacylglycerol synthesis	38	115	0.330435	0.64372	0	50799,22273,68262,17768,56421,100705,54403,20544,14194,20537,12715,11636,67863,11676,27402,13807,14571,78830,67680,78920,14732,104112,230163,78801,50784,17448,14081,18642,216019,15275,28169,212032,12709,67512,12183,66445,67895,269951
dag_hs_c_55	Diacylglycerol synthesis	38	115	0.330435	0.64372	0	50799,22273,68262,17768,56421,100705,54403,14194,20537,12715,11636,67863,11676,27402,13807,14571,78830,67680,78920,14732,11428,104112,230163,78801,246787,50784,17448,14081,18642,216019,15275,28169,212032,12709,67512,12183,66445,67895
dag_hs_c_65	Diacylglycerol synthesis	38	115	0.330435	0.64372	0	50799,22273,68262,218756,17768,56421,100705,14194,20537,12715,11636,67863,11676,27402,13807,14571,78830,67680,78920,14732,11428,104112,230163,78801,246787,50784,17448,14081,18642,216019,15275,28169,212032,12709,67512,12183,66445,67895
pa_hs_c_245	Phosphatidic acid synthesis	38	115	0.330435	0.64372	0	50799,22273,68262,17768,56421,100705,54403,14194,20537,12715,11636,67863,11676,27402,13807,14571,78830,67680,78920,14732,104112,230163,78801,246787,319848,17448,14081,18642,216019,15275,28169,212032,12709,67512,12183,66445,67895,269951
dag_hs_c_111	Diacylglycerol synthesis	39	118	0.330508	0.644114	0	50799,22273,68262,17768,56421,17252,100705,54403,14194,20537,12715,114479,11636,67863,11676,27402,13807,14571,78830,67680,78920,14732,104112,230163,78801,50784,17448,14081,18642,216019,15275,28169,212032,12709,67512,12183,66445,67895,269951
dag_hs_c_117	Diacylglycerol synthesis	39	118	0.330508	0.644114	0	50799,22273,68262,218756,17768,56421,15929,17252,100705,14194,20537,12715,11636,67863,11676,27402,13807,14571,78830,67680,78920,14732,104112,230163,78801,246787,50784,17448,14081,18642,216019,15275,28169,212032,12709,67512,12183,66445,67895
hdca_c_151	Hexadecanoate synthesis	39	118	0.330508	0.644114	0	50799,22273,218756,56421,15929,110446,100705,54403,78894,67041,14194,12715,11636,67863,11676,27402,13807,78830,67680,78920,224530,11409,230163,78801,246787,17448,241612,14081,18642,109342,216019,15275,212032,12709,78070,12183,57279,66445,67895
hdca_c_164	Hexadecanoate synthesis	39	118	0.330508	0.644114	0	50799,22273,56421,15929,110446,100705,54403,78894,67041,14194,20537,12715,11636,67863,11676,27402,13807,78830,67680,78920,224530,11409,230163,78801,246787,17448,241612,14081,18642,109342,216019,15275,212032,12709,78070,12183,57279,66445,67895
hdca_c_183	Hexadecanoate synthesis	39	118	0.330508	0.644114	0	50799,22273,218756,56421,15929,110446,100705,54403,78894,67041,14194,12715,11636,67863,11676,27402,13807,78830,67680,78920,224530,11409,230163,78801,246787,17448,241612,14081,18642,109342,216019,15275,212032,12709,78070,12183,57279,66445,67895
hdca_c_205	Hexadecanoate synthesis	39	118	0.330508	0.644114	0	50799,22273,56421,15929,110446,100705,54403,78894,67041,14194,20537,12715,11636,67863,11676,27402,13807,78830,67680,78920,224530,11409,230163,78801,246787,17448,241612,14081,18642,109342,216019,15275,212032,12709,78070,12183,57279,66445,67895
hdca_c_236	Hexadecanoate synthesis	39	118	0.330508	0.644114	0	50799,22273,56421,15929,110446,100705,54403,78894,67041,14194,20537,12715,11636,67863,11676,27402,13807,78830,67680,78920,224530,11409,230163,78801,246787,17448,241612,14081,18642,109342,216019,15275,212032,12709,78070,12183,57279,66445,67895
hdca_c_68	Hexadecanoate synthesis	39	118	0.330508	0.644114	0	50799,22273,56421,15929,110446,100705,54403,78894,67041,14194,20537,12715,11636,67863,11676,27402,13807,78830,67680,78920,224530,11409,230163,78801,246787,17448,241612,14081,18642,109342,216019,15275,212032,12709,78070,12183,57279,66445,67895
hdca_c_89	Hexadecanoate synthesis	39	118	0.330508	0.644114	0	50799,22273,56421,15929,110446,100705,54403,78894,67041,14194,20537,12715,11636,67863,11676,27402,13807,78830,67680,78920,224530,11409,230163,78801,246787,17448,241612,14081,18642,109342,216019,15275,212032,12709,78070,12183,57279,66445,67895
pa_hs_c_197	Phosphatidic acid synthesis	39	118	0.330508	0.644114	0	50799,22273,68262,17768,56421,15929,100705,54403,14194,20537,12715,11636,67863,11676,27402,13807,14571,78830,67680,78920,14732,104112,230163,78801,246787,17448,241612,14081,18642,109342,216019,15275,28169,212032,12709,67512,12183,66445,67895
pa_hs_c_220	Phosphatidic acid synthesis	39	118	0.330508	0.644114	0	50799,22273,69519,68262,56421,17252,100705,54403,14194,20537,12715,11636,67863,11676,27402,13807,78830,67680,78920,14732,20505,104112,230163,78801,246787,17448,14081,18642,216019,15275,20531,28169,212032,12709,67512,12183,66445,67895,269951
pa_hs_c_229	Phosphatidic acid synthesis	39	118	0.330508	0.644114	0	50799,22273,68262,17768,56421,17252,100705,54403,14194,20537,12715,11636,67863,11676,27402,13807,14571,78830,67680,78920,14732,104112,230163,78801,246787,319848,17448,14081,18642,216019,15275,28169,212032,12709,67512,12183,66445,67895,269951
tag_hs_c_178	Triacylglycerol synthesis	39	118	0.330508	0.644114	0	50799,22273,69519,68262,67800,56421,100705,54403,20544,14194,12715,11636,67863,11676,27402,13807,78830,67680,78920,14732,104112,230163,78801,246787,50784,17448,14081,18642,216019,15275,28169,212032,12709,67512,12183,66445,67895,269951,13350
tag_hs_c_19	Triacylglycerol synthesis	39	118	0.330508	0.644114	0	50799,22273,68262,67800,56421,100705,54403,20544,14194,12715,11636,67863,11676,27402,13807,78830,67680,78920,14732,14120,104112,230163,78801,246787,50784,17448,14081,18642,216019,15275,28169,212032,12709,67512,12183,66445,67895,269951,13350
dag_hs_c_134	Diacylglycerol synthesis	40	121	0.330579	0.644525	0	50799,22273,68262,218756,17768,56421,17252,100705,14194,20537,12715,114479,11636,67863,11676,27402,13807,14571,78830,67680,78920,14732,11428,104112,230163,78801,246787,50784,17448,14081,18642,216019,15275,28169,212032,12709,67512,12183,66445,67895
dag_hs_c_160	Diacylglycerol synthesis	40	121	0.330579	0.644525	0	50799,22273,68262,17768,56421,76459,100705,54403,14194,20537,12715,11636,67863,11676,27402,13807,14571,78830,67680,78920,14732,104112,230163,78801,50784,17448,14081,18642,216019,15275,28169,212032,12709,12351,67512,12183,66445,67895,269951,71934
dag_hs_c_209	Diacylglycerol synthesis	40	121	0.330579	0.644525	0	50799,22273,68262,17768,56421,76459,100705,54403,14194,20537,12715,11636,67863,11676,27402,13807,14571,78830,67680,78920,14732,104112,230163,78801,50784,17448,14081,18642,216019,15275,28169,212032,12709,12351,67512,12183,66445,67895,269951,71934
dag_hs_c_229	Diacylglycerol synthesis	40	121	0.330579	0.644525	0	50799,22273,68262,17768,56421,76459,100705,54403,14194,20537,12715,11636,67863,11676,27402,13807,14571,78830,67680,78920,14732,104112,230163,78801,50784,17448,14081,18642,216019,15275,28169,212032,12709,12351,67512,12183,66445,67895,269951,71934
hdca_c_106	Hexadecanoate synthesis	40	121	0.330579	0.644525	0	50799,22273,218756,56421,15929,17252,110446,100705,54403,78894,67041,14194,12715,11636,67863,11676,27402,13807,78830,67680,78920,224530,11409,230163,78801,246787,17448,241612,14081,18642,109342,216019,15275,212032,12709,78070,12183,57279,66445,67895
hdca_c_223	Hexadecanoate synthesis	40	121	0.330579	0.644525	0	50799,22273,56421,15929,17252,110446,100705,54403,78894,67041,14194,20537,12715,11636,67863,11676,27402,13807,78830,67680,78920,224530,11409,230163,78801,246787,17448,241612,14081,18642,109342,216019,15275,212032,12709,78070,12183,57279,66445,67895
hdca_c_237	Hexadecanoate synthesis	40	121	0.330579	0.644525	0	50799,22273,56421,15929,17252,110446,100705,54403,78894,67041,14194,20537,12715,11636,67863,11676,27402,13807,78830,67680,78920,224530,11409,230163,78801,246787,17448,241612,14081,18642,109342,216019,15275,212032,12709,78070,12183,57279,66445,67895
hdca_c_250	Hexadecanoate synthesis	40	121	0.330579	0.644525	0	50799,22273,218756,56421,15929,76459,110446,100705,54403,78894,67041,14194,20537,12715,11636,67863,11676,27402,13807,78830,67680,78920,224530,11409,230163,78801,17448,14081,18642,216019,15275,212032,12709,12351,78070,12183,57279,66445,67895,71934
hdca_c_6	Hexadecanoate synthesis	40	121	0.330579	0.644525	0	50799,22273,56421,15929,76459,110446,100705,54403,78894,67041,14194,20537,12715,114479,11636,67863,11676,27402,13807,78830,67680,78920,224530,11409,230163,78801,17448,14081,18642,216019,15275,212032,12709,12351,78070,12183,57279,66445,67895,71934
hdca_c_78	Hexadecanoate synthesis	40	121	0.330579	0.644525	0	50799,22273,56421,15929,17252,110446,100705,54403,78894,67041,14194,20537,12715,11636,67863,11676,27402,13807,78830,67680,78920,224530,11409,230163,78801,246787,17448,241612,14081,18642,109342,216019,15275,212032,12709,78070,12183,57279,66445,67895
pa_hs_c_68	Phosphatidic acid synthesis	40	121	0.330579	0.644525	0	50799,22273,68262,17768,56421,15929,100705,54403,20544,14194,20537,12715,114479,11636,67863,11676,27402,13807,14571,78830,67680,78920,14732,104112,230163,78801,246787,319848,17448,14081,18642,216019,15275,28169,212032,12709,67512,12183,66445,67895
pa_hs_c_88	Phosphatidic acid synthesis	40	121	0.330579	0.644525	0	50799,22273,68262,17768,56421,76459,100705,54403,14194,20537,12715,11636,67863,11676,27402,13807,14571,78830,67680,78920,14732,11428,104112,230163,78801,20515,17448,14081,18642,216019,15275,28169,212032,12709,12351,67512,12183,66445,67895,71934
tag_hs_c_182	Triacylglycerol synthesis	40	121	0.330579	0.644525	0	50799,22273,68262,67800,17768,56421,100705,54403,20544,14194,12715,11636,67863,11676,27402,13807,14571,78830,67680,78920,14732,11428,104112,230163,78801,246787,50784,17448,14081,18642,216019,15275,28169,212032,12709,67512,12183,66445,67895,13350
tag_hs_c_211	Triacylglycerol synthesis	40	121	0.330579	0.644525	0	50799,22273,68262,67800,17768,56421,17252,100705,54403,14194,20537,12715,11636,67863,11676,27402,13807,14571,78830,67680,78920,14732,11428,104112,230163,78801,50784,17448,14081,18642,216019,15275,28169,212032,12709,67512,12183,66445,67895,13350
tag_hs_c_99	Triacylglycerol synthesis	40	121	0.330579	0.644525	0	50799,22273,68262,67800,56421,100705,54403,20544,14194,12715,11636,67863,11676,27402,13807,78830,67680,78920,14732,104112,230163,78801,246787,50784,17448,241612,14081,18642,109342,216019,15275,28169,212032,12709,67512,12183,66445,67895,269951,13350
dag_hs_c_172	Diacylglycerol synthesis	41	124	0.330645	0.644952	0	50799,22273,68262,17768,56421,17252,100705,54403,14194,20537,12715,11636,67863,11676,27402,13807,14571,78830,67680,78920,14732,11428,104112,230163,78801,246787,50784,17448,241612,14081,18642,109342,216019,15275,28169,212032,12709,67512,12183,66445,67895
dag_hs_c_82	Diacylglycerol synthesis	41	124	0.330645	0.644952	0	50799,22273,68262,17768,56421,15929,76459,100705,14194,20537,12715,114479,11636,67863,11676,27402,13807,14571,78830,67680,78920,14732,104112,230163,78801,246787,50784,17448,14081,18642,216019,15275,28169,212032,12709,12351,67512,12183,66445,67895,71934
dag_hs_c_86	Diacylglycerol synthesis	41	124	0.330645	0.644952	0	50799,22273,68262,17768,56421,17252,100705,54403,14194,20537,12715,11636,67863,11676,27402,13807,14571,78830,67680,78920,14732,104112,230163,78801,246787,50784,17448,241612,14081,18642,109342,216019,15275,28169,212032,12709,67512,12183,66445,67895,269951
dag_hs_c_99	Diacylglycerol synthesis	41	124	0.330645	0.644952	0	50799,22273,68262,17768,56421,76459,100705,54403,14194,20537,12715,114479,11636,67863,11676,27402,13807,14571,78830,67680,78920,14732,11428,104112,230163,78801,50784,17448,14081,18642,216019,15275,28169,212032,12709,12351,67512,12183,66445,67895,71934
hdca_c_190	Hexadecanoate synthesis	41	124	0.330645	0.644952	0	50799,22273,56421,15929,17252,110446,100705,54403,78894,67041,14194,20537,12715,11636,67863,11676,27402,13807,78830,67680,78920,224530,11409,230163,107605,78801,246787,17448,241612,14081,18642,109342,216019,15275,212032,12709,78070,12183,57279,66445,67895
hdca_c_58	Hexadecanoate synthesis	41	124	0.330645	0.644952	0	50799,22273,56421,15929,76459,110446,100705,78894,67041,14194,20537,12715,11636,67863,11676,27402,13807,78830,67680,78920,224530,11409,230163,78801,246787,17448,241612,14081,18642,109342,216019,15275,212032,12709,12351,78070,12183,57279,66445,67895,71934
pa_hs_c_121	Phosphatidic acid synthesis	41	124	0.330645	0.644952	0	50799,22273,68262,17768,56421,17252,100705,54403,14194,20537,12715,114479,11636,67863,11676,27402,13807,14571,78830,67680,78920,14732,11428,104112,230163,78801,246787,17448,241612,14081,18642,109342,216019,15275,28169,212032,12709,67512,12183,66445,67895
pa_hs_c_129	Phosphatidic acid synthesis	41	124	0.330645	0.644952	0	50799,22273,68262,17768,56421,76459,100705,54403,14194,20537,12715,11636,67863,11676,27402,13807,14571,78830,67680,78920,14732,11428,104112,230163,78801,246787,20515,17448,14081,18642,216019,15275,28169,212032,12709,12351,67512,12183,66445,67895,71934
pa_hs_c_179	Phosphatidic acid synthesis	41	124	0.330645	0.644952	0	50799,22273,68262,17768,56421,17252,100705,54403,14194,12715,11636,67863,11676,27402,13807,14571,78830,67680,78920,14732,11428,20505,104112,230163,78801,246787,17448,241612,14081,18642,109342,216019,15275,20531,28169,212032,12709,67512,12183,66445,67895
pa_hs_c_93	Phosphatidic acid synthesis	41	124	0.330645	0.644952	0	50799,22273,68262,17768,56421,15929,76459,100705,54403,14194,20537,12715,11636,67863,11676,27402,13807,14571,78830,67680,78920,14732,20505,104112,230163,78801,17448,14081,18642,216019,15275,20531,28169,212032,12709,12351,67512,12183,66445,67895,71934
pail_hs_c_233	Phosphatidylinositol synthesis	41	124	0.330645	0.644952	0	50799,22273,68262,17768,56421,110446,100705,54403,78894,67041,14194,20537,12715,11636,67863,11676,27402,13807,14571,78830,67680,78920,14732,224530,230163,78801,114663,20515,17448,14081,18642,216019,15275,28169,212032,12709,67512,12183,66445,67895,269951
tag_hs_c_224	Triacylglycerol synthesis	41	124	0.330645	0.644952	0	50799,22273,68262,67800,56421,76459,100705,54403,14194,20537,12715,11636,67863,11676,27402,13807,78830,67680,78920,14732,14120,104112,230163,78801,50784,17448,14081,18642,216019,15275,28169,212032,12709,12351,67512,12183,66445,67895,269951,13350,71934
tag_hs_c_9	Triacylglycerol synthesis	41	124	0.330645	0.644952	0	50799,22273,68262,67800,17768,56421,76459,100705,14194,20537,12715,11636,67863,11676,27402,13807,14571,78830,67680,78920,14732,11428,104112,230163,78801,50784,17448,14081,18642,216019,15275,28169,212032,12709,12351,67512,12183,66445,67895,13350,71934
dag_hs_c_29	Diacylglycerol synthesis	42	127	0.330709	0.645393	0	50799,22273,68262,17768,56421,15929,76459,100705,54403,14194,12715,11636,67863,11676,27402,13807,14571,78830,67680,78920,14732,104112,230163,78801,246787,50784,17448,241612,14081,18642,109342,216019,15275,28169,212032,12709,12351,67512,12183,66445,67895,71934
dag_hs_c_42	Diacylglycerol synthesis	42	127	0.330709	0.645393	0	50799,22273,68262,17768,56421,15929,76459,100705,54403,14194,12715,11636,67863,11676,27402,13807,14571,78830,67680,78920,14732,104112,230163,78801,246787,50784,17448,241612,14081,18642,109342,216019,15275,28169,212032,12709,12351,67512,12183,66445,67895,71934
dag_hs_c_84	Diacylglycerol synthesis	42	127	0.330709	0.645393	0	50799,22273,68262,17768,56421,17252,76459,100705,54403,14194,20537,12715,114479,11636,67863,11676,27402,13807,14571,78830,67680,78920,14732,104112,230163,78801,50784,17448,14081,18642,216019,15275,28169,212032,12709,12351,67512,12183,66445,67895,269951,71934
dag_hs_c_85	Diacylglycerol synthesis	42	127	0.330709	0.645393	0	50799,22273,68262,17768,56421,15929,76459,100705,54403,14194,12715,11636,67863,11676,27402,13807,14571,78830,67680,78920,14732,104112,230163,78801,246787,50784,17448,241612,14081,18642,109342,216019,15275,28169,212032,12709,12351,67512,12183,66445,67895,71934
hdca_c_108	Hexadecanoate synthesis	42	127	0.330709	0.645393	0	50799,22273,56421,15929,76459,110446,100705,78894,67041,20544,14194,20537,12715,11636,67863,11676,27402,13807,78830,67680,78920,224530,11409,230163,78801,246787,17448,241612,14081,18642,109342,216019,15275,212032,12709,12351,78070,12183,57279,66445,67895,71934
hdca_c_109	Hexadecanoate synthesis	42	127	0.330709	0.645393	0	50799,22273,218756,56421,15929,76459,110446,100705,54403,78894,67041,14194,12715,11636,67863,11676,27402,13807,78830,67680,78920,224530,11409,230163,78801,246787,17448,241612,14081,18642,109342,216019,15275,212032,12709,12351,78070,12183,57279,66445,67895,71934
hdca_c_113	Hexadecanoate synthesis	42	127	0.330709	0.645393	0	50799,22273,56421,15929,76459,110446,100705,54403,78894,67041,14194,20537,12715,11636,67863,11676,27402,13807,78830,67680,78920,224530,11409,230163,78801,246787,17448,241612,14081,18642,109342,216019,15275,212032,12709,12351,78070,12183,57279,66445,67895,71934
hdca_c_126	Hexadecanoate synthesis	42	127	0.330709	0.645393	0	50799,22273,56421,15929,76459,110446,100705,54403,78894,67041,14194,20537,12715,11636,67863,11676,27402,13807,78830,67680,78920,224530,11409,230163,78801,246787,17448,241612,14081,18642,109342,216019,15275,212032,12709,12351,78070,12183,57279,66445,67895,71934
hdca_c_13	Hexadecanoate synthesis	42	127	0.330709	0.645393	0	50799,22273,56421,15929,76459,110446,100705,78894,67041,20544,14194,20537,12715,11636,67863,11676,27402,13807,78830,67680,78920,224530,11409,230163,78801,246787,17448,241612,14081,18642,109342,216019,15275,212032,12709,12351,78070,12183,57279,66445,67895,71934
hdca_c_251	Hexadecanoate synthesis	42	127	0.330709	0.645393	0	50799,22273,218756,56421,15929,76459,110446,100705,54403,78894,67041,14194,12715,11636,67863,11676,27402,13807,78830,67680,78920,224530,11409,230163,78801,246787,17448,241612,14081,18642,109342,216019,15275,212032,12709,12351,78070,12183,57279,66445,67895,71934
hdca_c_253	Hexadecanoate synthesis	42	127	0.330709	0.645393	0	50799,22273,56421,15929,76459,110446,100705,78894,67041,20544,14194,20537,12715,11636,67863,11676,27402,13807,78830,67680,78920,224530,11409,230163,78801,246787,17448,241612,14081,18642,109342,216019,15275,212032,12709,12351,78070,12183,57279,66445,67895,71934
pa_hs_c_2	Phosphatidic acid synthesis	42	127	0.330709	0.645393	0	50799,22273,68262,17768,56421,15929,76459,100705,54403,14194,12715,11636,67863,11676,27402,13807,14571,78830,67680,78920,14732,104112,230163,78801,246787,319848,17448,241612,14081,18642,109342,216019,15275,28169,212032,12709,12351,67512,12183,66445,67895,71934
pa_hs_c_27	Phosphatidic acid synthesis	42	127	0.330709	0.645393	0	50799,22273,68262,17768,56421,17252,76459,100705,54403,14194,20537,12715,11636,67863,11676,27402,13807,14571,78830,67680,78920,14732,20505,104112,230163,78801,17448,14081,18642,216019,15275,20531,28169,212032,12709,12351,67512,12183,66445,67895,269951,71934
pa_hs_c_72	Phosphatidic acid synthesis	42	127	0.330709	0.645393	0	50799,22273,68262,17768,56421,17252,100705,54403,20544,14194,12715,11636,67863,11676,27402,13807,14571,78830,67680,78920,14732,20505,104112,230163,78801,246787,17448,241612,14081,18642,109342,216019,15275,20531,28169,212032,12709,67512,12183,66445,67895,269951
tag_hs_c_220	Triacylglycerol synthesis	42	127	0.330709	0.645393	0	50799,22273,68262,67800,17768,56421,15929,76459,100705,54403,14194,20537,12715,11636,67863,11676,27402,13807,14571,78830,67680,78920,14732,104112,230163,78801,50784,17448,14081,18642,216019,15275,28169,212032,12709,12351,67512,12183,66445,67895,13350,71934
tag_hs_c_36	Triacylglycerol synthesis	42	127	0.330709	0.645393	0	50799,22273,68262,218756,67800,56421,76459,100705,54403,20544,14194,12715,11636,67863,11676,27402,13807,78830,67680,78920,14732,104112,230163,78801,246787,50784,17448,14081,18642,216019,15275,28169,212032,12709,12351,67512,12183,66445,67895,269951,13350,71934
dag_hs_c_168	Diacylglycerol synthesis	43	130	0.330769	0.645848	0	50799,22273,68262,218756,17768,56421,17252,76459,100705,14194,12715,11636,67863,11676,27402,13807,14571,78830,67680,78920,14732,104112,230163,78801,246787,50784,17448,241612,14081,18642,109342,216019,15275,28169,212032,12709,12351,67512,12183,66445,67895,269951,71934
dag_hs_c_196	Diacylglycerol synthesis	43	130	0.330769	0.645848	0	50799,22273,68262,17768,56421,17252,76459,100705,14194,20537,12715,11636,67863,11676,27402,13807,14571,78830,67680,78920,14732,104112,230163,78801,246787,50784,17448,241612,14081,18642,109342,216019,15275,28169,212032,12709,12351,67512,12183,66445,67895,269951,71934
dag_hs_c_32	Diacylglycerol synthesis	43	130	0.330769	0.645848	0	50799,22273,68262,17768,56421,15929,17252,76459,100705,54403,14194,12715,11636,67863,11676,27402,13807,14571,78830,67680,78920,14732,104112,230163,78801,246787,50784,17448,241612,14081,18642,109342,216019,15275,28169,212032,12709,12351,67512,12183,66445,67895,71934
hdca_c_118	Hexadecanoate synthesis	43	130	0.330769	0.645848	0	50799,22273,218756,56421,15929,17252,76459,110446,100705,78894,67041,14194,20537,12715,11636,67863,11676,27402,13807,78830,67680,78920,224530,11409,230163,78801,246787,17448,241612,14081,18642,109342,216019,15275,212032,12709,12351,78070,12183,57279,66445,67895,71934
hdca_c_145	Hexadecanoate synthesis	43	130	0.330769	0.645848	0	50799,22273,56421,15929,17252,76459,110446,100705,54403,78894,67041,14194,20537,12715,11636,67863,11676,27402,13807,78830,67680,78920,224530,11409,230163,78801,246787,17448,241612,14081,18642,109342,216019,15275,212032,12709,12351,78070,12183,57279,66445,67895,71934
hdca_c_162	Hexadecanoate synthesis	43	130	0.330769	0.645848	0	50799,22273,56421,15929,76459,110446,100705,54403,78894,67041,14194,20537,12715,114479,11636,67863,11676,27402,13807,78830,67680,78920,224530,11409,230163,78801,246787,17448,241612,14081,18642,109342,216019,15275,212032,12709,12351,78070,12183,57279,66445,67895,71934
hdca_c_208	Hexadecanoate synthesis	43	130	0.330769	0.645848	0	50799,22273,218756,56421,15929,17252,76459,110446,100705,54403,78894,67041,14194,12715,11636,67863,11676,27402,13807,78830,67680,78920,224530,11409,230163,78801,246787,17448,241612,14081,18642,109342,216019,15275,212032,12709,12351,78070,12183,57279,66445,67895,71934
pa_hs_c_228	Phosphatidic acid synthesis	43	130	0.330769	0.645848	0	50799,22273,68262,17768,56421,17252,76459,100705,14194,20537,12715,11636,67863,11676,27402,13807,14571,78830,67680,78920,14732,11428,104112,230163,78801,246787,20515,17448,241612,14081,18642,109342,216019,15275,28169,212032,12709,12351,67512,12183,66445,67895,71934
pa_hs_c_23	Phosphatidic acid synthesis	43	130	0.330769	0.645848	0	50799,22273,68262,218756,17768,56421,17252,76459,100705,20544,14194,20537,12715,114479,11636,67863,11676,27402,13807,14571,78830,67680,78920,14732,104112,230163,78801,319848,17448,14081,18642,216019,15275,28169,212032,12709,12351,67512,12183,66445,67895,269951,71934
pa_hs_c_62	Phosphatidic acid synthesis	43	130	0.330769	0.645848	0	50799,22273,68262,17768,56421,15929,76459,100705,54403,14194,20537,12715,11636,67863,11676,27402,13807,14571,78830,67680,78920,14732,104112,230163,78801,246787,319848,17448,241612,14081,18642,109342,216019,15275,28169,212032,12709,12351,67512,12183,66445,67895,71934
pa_hs_c_70	Phosphatidic acid synthesis	43	130	0.330769	0.645848	0	50799,22273,68262,17768,56421,17252,100705,54403,20544,14194,20537,12715,114479,11636,67863,11676,27402,13807,14571,78830,67680,78920,14732,104112,230163,78801,246787,319848,17448,241612,14081,18642,109342,216019,15275,28169,212032,12709,67512,12183,66445,67895,269951
pa_hs_c_8	Phosphatidic acid synthesis	43	130	0.330769	0.645848	0	50799,22273,68262,17768,56421,17252,76459,100705,14194,20537,12715,114479,11636,67863,11676,27402,13807,14571,78830,67680,78920,14732,11428,104112,230163,78801,246787,17448,241612,14081,18642,109342,216019,15275,28169,212032,12709,12351,67512,12183,66445,67895,71934
pail_hs_c_89	Phosphatidylinositol synthesis	43	130	0.330769	0.645848	0	50799,22273,68262,218756,17768,56421,15929,110446,100705,78894,67041,14194,20537,12715,114479,11636,67863,11676,27402,13807,14571,78830,67680,78920,14732,224530,230163,78801,246787,114663,20515,17448,14081,18642,216019,15275,28169,212032,12709,67512,12183,66445,67895
tag_hs_c_100	Triacylglycerol synthesis	43	130	0.330769	0.645848	0	50799,22273,68262,67800,17768,56421,17252,76459,100705,54403,14194,20537,12715,11636,67863,11676,27402,13807,14571,78830,67680,78920,14732,11428,104112,230163,78801,50784,17448,14081,18642,216019,15275,28169,212032,12709,12351,67512,12183,66445,67895,13350,71934
tag_hs_c_137	Triacylglycerol synthesis	43	130	0.330769	0.645848	0	50799,22273,68262,67800,17768,56421,17252,76459,100705,54403,14194,20537,12715,11636,67863,11676,27402,13807,14571,78830,67680,78920,14732,11428,104112,230163,78801,50784,17448,14081,18642,216019,15275,28169,212032,12709,12351,67512,12183,66445,67895,13350,71934
tag_hs_c_69	Triacylglycerol synthesis	43	130	0.330769	0.645848	0	50799,22273,68262,67800,17768,56421,17252,76459,100705,14194,20537,12715,114479,11636,67863,11676,27402,13807,14571,78830,67680,78920,14732,11428,104112,230163,78801,50784,17448,14081,18642,216019,15275,28169,212032,12709,12351,67512,12183,66445,67895,13350,71934
dag_hs_c_150	Diacylglycerol synthesis	44	133	0.330827	0.646316	0	50799,22273,68262,218756,17768,56421,17252,76459,100705,14194,20537,12715,11636,67863,11676,27402,13807,14571,78830,67680,78920,14732,11428,104112,230163,78801,246787,50784,17448,241612,14081,18642,109342,216019,15275,28169,212032,12709,12351,67512,12183,66445,67895,71934
dag_hs_c_155	Diacylglycerol synthesis	44	133	0.330827	0.646316	0	50799,22273,68262,17768,56421,17252,76459,100705,14194,20537,12715,11636,67863,11676,27402,13807,14571,78830,67680,78920,14732,104112,230163,107605,78801,246787,50784,17448,241612,14081,18642,109342,216019,15275,28169,212032,12709,12351,67512,12183,66445,67895,269951,71934
dag_hs_c_37	Diacylglycerol synthesis	44	133	0.330827	0.646316	0	50799,22273,68262,17768,56421,15929,17252,76459,100705,54403,14194,12715,11636,67863,11676,27402,13807,14571,78830,67680,78920,14732,104112,230163,107605,78801,246787,50784,17448,241612,14081,18642,109342,216019,15275,28169,212032,12709,12351,67512,12183,66445,67895,71934
dag_hs_c_89	Diacylglycerol synthesis	44	133	0.330827	0.646316	0	50799,22273,68262,17768,56421,17252,76459,100705,54403,14194,20537,12715,11636,67863,11676,27402,13807,14571,78830,67680,78920,14732,104112,230163,78801,246787,50784,17448,241612,14081,18642,109342,216019,15275,28169,212032,12709,12351,67512,12183,66445,67895,269951,71934
hdca_c_179	Hexadecanoate synthesis	44	133	0.330827	0.646316	0	50799,22273,56421,15929,17252,76459,110446,100705,54403,78894,67041,14194,20537,12715,11636,67863,11676,27402,13807,78830,67680,78920,224530,11409,230163,107605,78801,246787,17448,241612,14081,18642,109342,216019,15275,212032,12709,12351,78070,12183,57279,66445,67895,71934
pa_hs_c_160	Phosphatidic acid synthesis	44	133	0.330827	0.646316	0	50799,22273,68262,17768,56421,17252,76459,100705,20544,14194,20537,12715,11636,67863,11676,27402,13807,14571,78830,67680,78920,14732,11428,104112,230163,78801,246787,319848,17448,241612,14081,18642,109342,216019,15275,28169,212032,12709,12351,67512,12183,66445,67895,71934
pail_hs_c_49	Phosphatidylinositol synthesis	44	133	0.330827	0.646316	0	50799,22273,68262,218756,17768,56421,17252,110446,100705,54403,78894,67041,14194,20537,12715,11636,67863,11676,27402,13807,14571,78830,67680,78920,14732,224530,20505,230163,78801,114663,17448,14081,18642,216019,15275,20531,28169,212032,12709,67512,12183,66445,67895,269951
pail_hs_c_61	Phosphatidylinositol synthesis	44	133	0.330827	0.646316	0	50799,22273,68262,17768,56421,110446,100705,54403,78894,67041,14194,20537,12715,11636,67863,11676,27402,13807,14571,78830,67680,78920,14732,224530,230163,78801,246787,114663,20515,17448,241612,14081,18642,109342,216019,15275,28169,212032,12709,67512,12183,66445,67895,269951
tag_hs_c_128	Triacylglycerol synthesis	44	133	0.330827	0.646316	0	50799,22273,68262,67800,56421,76459,100705,54403,20544,14194,20537,12715,11636,67863,11676,27402,13807,78830,67680,78920,14732,104112,230163,78801,246787,50784,17448,241612,14081,18642,109342,216019,15275,28169,212032,12709,12351,67512,12183,66445,67895,269951,13350,71934
tag_hs_c_81	Triacylglycerol synthesis	44	133	0.330827	0.646316	0	50799,22273,68262,67800,56421,76459,100705,54403,20544,14194,20537,12715,11636,67863,11676,27402,13807,78830,67680,78920,14732,104112,230163,78801,246787,50784,17448,241612,14081,18642,109342,216019,15275,28169,212032,12709,12351,67512,12183,66445,67895,269951,13350,71934
pail_hs_c_11	Phosphatidylinositol synthesis	45	136	0.330882	0.646796	0	50799,22273,68262,17768,56421,110446,100705,54403,78894,67041,20544,14194,12715,11636,67863,11676,27402,13807,14571,78830,67680,78920,14732,224530,20505,230163,78801,246787,114663,17448,241612,14081,18642,109342,216019,15275,20531,28169,212032,12709,67512,12183,66445,67895,269951
pail_hs_c_156	Phosphatidylinositol synthesis	45	136	0.330882	0.646796	0	50799,22273,68262,56421,15929,100705,54403,14194,20537,12715,11636,67863,11676,27402,13807,78830,67680,78920,14732,11409,20505,104112,230163,78801,246787,114663,20515,17448,241612,14081,18642,109342,216019,15275,20531,28169,212032,12709,78070,67512,12183,57279,66445,67895,269951
tag_hs_c_187	Triacylglycerol synthesis	45	136	0.330882	0.646796	0	50799,22273,68262,67800,56421,17252,76459,100705,54403,14194,20537,12715,11636,67863,11676,27402,13807,78830,67680,78920,14732,14120,104112,230163,78801,246787,50784,17448,241612,14081,18642,109342,216019,15275,28169,212032,12709,12351,67512,12183,66445,67895,269951,13350,71934
tag_hs_c_213	Triacylglycerol synthesis	45	136	0.330882	0.646796	0	50799,22273,69519,68262,67800,56421,17252,76459,100705,54403,14194,20537,12715,11636,67863,11676,27402,13807,78830,67680,78920,14732,104112,230163,78801,246787,50784,17448,241612,14081,18642,109342,216019,15275,28169,212032,12709,12351,67512,12183,66445,67895,269951,13350,71934
pail_hs_c_175	Phosphatidylinositol synthesis	47	142	0.330986	0.647787	0	50799,22273,68262,17768,56421,76459,110446,100705,78894,67041,14194,20537,12715,11636,67863,11676,27402,13807,14571,78830,67680,78920,14732,224530,20505,230163,78801,246787,114663,17448,241612,14081,18642,109342,216019,15275,20531,28169,212032,12709,12351,67512,12183,66445,67895,269951,71934
pail_hs_c_223	Phosphatidylinositol synthesis	47	142	0.330986	0.647787	0	50799,22273,68262,17768,56421,76459,110446,100705,54403,78894,67041,14194,20537,12715,11636,67863,11676,27402,13807,14571,78830,67680,78920,14732,224530,230163,78801,246787,114663,20515,17448,241612,14081,18642,109342,216019,15275,28169,212032,12709,12351,67512,12183,66445,67895,269951,71934
pail_hs_c_64	Phosphatidylinositol synthesis	47	142	0.330986	0.647787	0	50799,22273,68262,17768,56421,76459,110446,100705,78894,67041,14194,20537,12715,11636,67863,11676,27402,13807,14571,78830,67680,78920,14732,224530,20505,230163,78801,246787,114663,17448,241612,14081,18642,109342,216019,15275,20531,28169,212032,12709,12351,67512,12183,66445,67895,269951,71934
tag_hs_c_70	Triacylglycerol synthesis	47	142	0.330986	0.647787	0	50799,22273,68262,218756,67800,56421,17252,76459,100705,20544,14194,20537,12715,114479,11636,67863,11676,27402,13807,78830,67680,78920,14732,104112,230163,107605,78801,246787,50784,17448,241612,14081,18642,109342,216019,15275,28169,212032,12709,12351,67512,12183,66445,67895,269951,13350,71934
pail_hs_c_109	Phosphatidylinositol synthesis	48	145	0.331034	0.648298	0	50799,22273,68262,218756,17768,56421,15929,17252,76459,110446,100705,78894,67041,14194,20537,12715,11636,67863,11676,27402,13807,14571,78830,67680,78920,14732,224530,230163,78801,246787,114663,20515,17448,241612,14081,18642,109342,216019,15275,28169,212032,12709,12351,67512,12183,66445,67895,71934
pail_hs_c_32	Phosphatidylinositol synthesis	48	145	0.331034	0.648298	0	50799,22273,68262,218756,56421,15929,76459,100705,14194,20537,12715,11636,67863,11676,27402,13807,78830,67680,78920,14732,11409,20505,104112,230163,78801,246787,114663,20515,17448,241612,14081,18642,109342,216019,15275,20531,28169,212032,12709,12351,78070,67512,12183,57279,66445,67895,269951,71934
pail_hs_c_82	Phosphatidylinositol synthesis	48	145	0.331034	0.648298	0	50799,22273,68262,56421,15929,17252,76459,100705,54403,14194,20537,12715,114479,11636,67863,11676,27402,13807,78830,67680,78920,14732,11409,104112,230163,78801,246787,114663,20515,17448,241612,14081,18642,109342,216019,15275,28169,212032,12709,12351,78070,67512,12183,57279,66445,67895,269951,71934
pail_hs_c_196	Phosphatidylinositol synthesis	49	148	0.331081	0.648818	0	50799,22273,68262,17768,56421,17252,76459,110446,100705,54403,78894,67041,14194,20537,12715,114479,11636,67863,11676,27402,13807,14571,78830,67680,78920,14732,224530,230163,78801,246787,114663,20515,17448,241612,14081,18642,109342,216019,15275,28169,212032,12709,12351,67512,12183,66445,67895,269951,71934
pail_hs_c_202	Phosphatidylinositol synthesis	49	148	0.331081	0.648818	0	50799,22273,68262,56421,15929,17252,76459,100705,54403,14194,20537,12715,114479,11636,67863,11676,27402,13807,78830,67680,78920,14732,11409,20505,104112,230163,78801,246787,114663,17448,241612,14081,18642,109342,216019,15275,20531,28169,212032,12709,12351,78070,67512,12183,57279,66445,67895,269951,71934
pa_hs_c_104	Phosphatidic acid synthesis	35	107	0.327103	0.668956	0	50799,22273,68262,218756,56421,100705,14194,20537,12715,11636,67863,11676,27402,13807,78830,67680,78920,14732,104112,230163,78801,246787,17448,14081,18642,216019,15275,28169,212032,12709,67512,12183,66445,67895,269951
pa_hs_c_125	Phosphatidic acid synthesis	35	107	0.327103	0.668956	0	50799,22273,68262,218756,56421,100705,14194,20537,12715,11636,67863,11676,27402,13807,78830,67680,78920,14732,104112,230163,78801,246787,17448,14081,18642,216019,15275,28169,212032,12709,67512,12183,66445,67895,269951
pa_hs_c_85	Phosphatidic acid synthesis	36	110	0.327273	0.66896	0	50799,22273,68262,56421,100705,54403,14194,20537,12715,11636,67863,11676,27402,13807,78830,67680,78920,14732,104112,230163,78801,246787,319848,17448,14081,18642,216019,15275,28169,212032,12709,67512,12183,66445,67895,269951
pa_hs_c_97	Phosphatidic acid synthesis	36	110	0.327273	0.66896	0	50799,22273,68262,218756,56421,100705,14194,20537,12715,11636,67863,11676,27402,13807,78830,67680,78920,14732,104112,230163,78801,246787,20515,17448,14081,18642,216019,15275,28169,212032,12709,67512,12183,66445,67895,269951
hdca_c_168	Hexadecanoate synthesis	37	113	0.327434	0.668998	0	50799,22273,56421,15929,110446,100705,54403,78894,67041,14194,20537,12715,11636,67863,11676,27402,13807,78830,67680,78920,224530,11409,230163,78801,246787,17448,14081,18642,216019,15275,212032,12709,78070,12183,57279,66445,67895
pa_hs_c_189	Phosphatidic acid synthesis	37	113	0.327434	0.668998	0	50799,22273,68262,17768,56421,15929,100705,54403,14194,20537,12715,11636,67863,11676,27402,13807,14571,78830,67680,78920,14732,104112,230163,78801,20515,17448,14081,18642,216019,15275,28169,212032,12709,67512,12183,66445,67895
dag_hs_c_60	Diacylglycerol synthesis	38	116	0.327586	0.669068	0	50799,22273,68262,17768,56421,17252,100705,54403,14194,20537,12715,11636,67863,11676,27402,13807,14571,78830,67680,78920,14732,104112,230163,78801,50784,17448,14081,18642,216019,15275,28169,212032,12709,67512,12183,66445,67895,269951
hdca_c_195	Hexadecanoate synthesis	38	116	0.327586	0.669068	0	50799,22273,56421,15929,110446,100705,54403,78894,67041,20544,14194,20537,12715,11636,67863,11676,27402,13807,78830,67680,78920,224530,11409,230163,78801,246787,17448,14081,18642,216019,15275,212032,12709,78070,12183,57279,66445,67895
dag_hs_c_64	Diacylglycerol synthesis	39	119	0.327731	0.669167	0	50799,22273,68262,17768,56421,100705,54403,20544,14194,20537,12715,11636,67863,11676,27402,13807,14571,78830,67680,78920,14732,104112,230163,78801,246787,50784,17448,14081,18642,216019,15275,28169,212032,12709,67512,12183,66445,67895,269951
hdca_c_22	Hexadecanoate synthesis	39	119	0.327731	0.669167	0	50799,22273,56421,15929,110446,100705,54403,78894,67041,14194,20537,12715,11636,67863,11676,27402,13807,78830,67680,78920,224530,11409,230163,78801,246787,17448,241612,14081,18642,109342,216019,15275,212032,12709,78070,12183,57279,66445,67895
hdca_c_260	Hexadecanoate synthesis	39	119	0.327731	0.669167	0	50799,22273,56421,15929,76459,110446,100705,54403,78894,67041,14194,20537,12715,11636,67863,11676,27402,13807,78830,67680,78920,224530,11409,230163,78801,17448,14081,18642,216019,15275,212032,12709,12351,78070,12183,57279,66445,67895,71934
pa_hs_c_14	Phosphatidic acid synthesis	39	119	0.327731	0.669167	0	50799,22273,68262,17768,56421,17252,100705,54403,14194,20537,12715,11636,67863,11676,27402,13807,14571,78830,67680,78920,14732,104112,230163,78801,246787,20515,17448,14081,18642,216019,15275,28169,212032,12709,67512,12183,66445,67895,269951
pa_hs_c_166	Phosphatidic acid synthesis	39	119	0.327731	0.669167	0	50799,22273,68262,17768,56421,76459,100705,54403,14194,20537,12715,11636,67863,11676,27402,13807,14571,78830,67680,78920,14732,104112,230163,78801,17448,14081,18642,216019,15275,28169,212032,12709,12351,67512,12183,66445,67895,269951,71934
tag_hs_c_144	Triacylglycerol synthesis	39	119	0.327731	0.669167	0	50799,22273,69519,68262,67800,56421,100705,54403,20544,14194,12715,11636,67863,11676,27402,13807,78830,67680,78920,14732,104112,230163,78801,246787,50784,17448,14081,18642,216019,15275,28169,212032,12709,67512,12183,66445,67895,269951,13350
dag_hs_c_113	Diacylglycerol synthesis	40	122	0.327869	0.669294	0	50799,22273,68262,218756,17768,56421,76459,100705,14194,20537,12715,11636,67863,11676,27402,13807,14571,78830,67680,78920,14732,11428,104112,230163,78801,50784,17448,14081,18642,216019,15275,28169,212032,12709,12351,67512,12183,66445,67895,71934
dag_hs_c_144	Diacylglycerol synthesis	40	122	0.327869	0.669294	0	50799,22273,68262,17768,56421,76459,100705,54403,14194,20537,12715,11636,67863,11676,27402,13807,14571,78830,67680,78920,14732,104112,230163,78801,50784,17448,14081,18642,216019,15275,28169,212032,12709,12351,67512,12183,66445,67895,269951,71934
dag_hs_c_63	Diacylglycerol synthesis	40	122	0.327869	0.669294	0	50799,22273,68262,218756,17768,56421,76459,100705,14194,20537,12715,11636,67863,11676,27402,13807,14571,78830,67680,78920,14732,104112,230163,78801,50784,17448,14081,18642,216019,15275,28169,212032,12709,12351,67512,12183,66445,67895,269951,71934
hdca_c_147	Hexadecanoate synthesis	40	122	0.327869	0.669294	0	50799,22273,218756,56421,15929,76459,110446,100705,78894,67041,14194,20537,12715,114479,11636,67863,11676,27402,13807,78830,67680,78920,224530,11409,230163,78801,17448,14081,18642,216019,15275,212032,12709,12351,78070,12183,57279,66445,67895,71934
hdca_c_15	Hexadecanoate synthesis	40	122	0.327869	0.669294	0	50799,22273,218756,56421,15929,110446,100705,54403,78894,67041,20544,14194,12715,11636,67863,11676,27402,13807,78830,67680,78920,224530,11409,230163,78801,246787,17448,241612,14081,18642,109342,216019,15275,212032,12709,78070,12183,57279,66445,67895
hdca_c_155	Hexadecanoate synthesis	40	122	0.327869	0.669294	0	50799,22273,56421,15929,76459,110446,100705,54403,78894,67041,14194,20537,12715,114479,11636,67863,11676,27402,13807,78830,67680,78920,224530,11409,230163,78801,17448,14081,18642,216019,15275,212032,12709,12351,78070,12183,57279,66445,67895,71934
hdca_c_247	Hexadecanoate synthesis	40	122	0.327869	0.669294	0	50799,22273,218756,56421,15929,76459,110446,100705,54403,78894,67041,14194,20537,12715,11636,67863,11676,27402,13807,78830,67680,78920,224530,11409,230163,78801,17448,14081,18642,216019,15275,212032,12709,12351,78070,12183,57279,66445,67895,71934
pa_hs_c_151	Phosphatidic acid synthesis	40	122	0.327869	0.669294	0	50799,22273,68262,17768,56421,15929,76459,100705,54403,14194,20537,12715,11636,67863,11676,27402,13807,14571,78830,67680,78920,14732,104112,230163,78801,20515,17448,14081,18642,216019,15275,28169,212032,12709,12351,67512,12183,66445,67895,71934
pa_hs_c_175	Phosphatidic acid synthesis	40	122	0.327869	0.669294	0	50799,22273,68262,17768,56421,15929,76459,100705,14194,20537,12715,11636,67863,11676,27402,13807,14571,78830,67680,78920,14732,104112,230163,78801,246787,20515,17448,14081,18642,216019,15275,28169,212032,12709,12351,67512,12183,66445,67895,71934
tag_hs_c_141	Triacylglycerol synthesis	40	122	0.327869	0.669294	0	50799,22273,68262,67800,17768,56421,17252,100705,54403,14194,20537,12715,11636,67863,11676,27402,13807,14571,78830,67680,78920,14732,11428,104112,230163,78801,50784,17448,14081,18642,216019,15275,28169,212032,12709,67512,12183,66445,67895,13350
dag_hs_c_11	Diacylglycerol synthesis	41	125	0.328	0.669447	0	50799,22273,68262,17768,56421,17252,76459,100705,54403,14194,20537,12715,11636,67863,11676,27402,13807,14571,78830,67680,78920,14732,104112,230163,78801,50784,17448,14081,18642,216019,15275,28169,212032,12709,12351,67512,12183,66445,67895,269951,71934
dag_hs_c_17	Diacylglycerol synthesis	41	125	0.328	0.669447	0	50799,22273,68262,17768,56421,15929,76459,100705,14194,12715,11636,67863,11676,27402,13807,14571,78830,67680,78920,14732,104112,230163,78801,246787,50784,17448,241612,14081,18642,109342,216019,15275,28169,212032,12709,12351,67512,12183,66445,67895,71934
dag_hs_c_3	Diacylglycerol synthesis	41	125	0.328	0.669447	0	50799,22273,68262,17768,56421,15929,76459,100705,14194,12715,11636,67863,11676,27402,13807,14571,78830,67680,78920,14732,104112,230163,78801,246787,50784,17448,241612,14081,18642,109342,216019,15275,28169,212032,12709,12351,67512,12183,66445,67895,71934
dag_hs_c_51	Diacylglycerol synthesis	41	125	0.328	0.669447	0	50799,22273,68262,17768,56421,15929,76459,100705,14194,12715,11636,67863,11676,27402,13807,14571,78830,67680,78920,14732,104112,230163,78801,246787,50784,17448,241612,14081,18642,109342,216019,15275,28169,212032,12709,12351,67512,12183,66445,67895,71934
dag_hs_c_75	Diacylglycerol synthesis	41	125	0.328	0.669447	0	50799,22273,68262,218756,17768,56421,17252,100705,54403,20544,14194,20537,12715,11636,67863,11676,27402,13807,14571,78830,67680,78920,14732,11428,104112,230163,107605,78801,50784,17448,14081,18642,216019,15275,28169,212032,12709,67512,12183,66445,67895
dag_hs_c_76	Diacylglycerol synthesis	41	125	0.328	0.669447	0	50799,22273,68262,17768,56421,17252,76459,100705,54403,14194,20537,12715,11636,67863,11676,27402,13807,14571,78830,67680,78920,14732,11428,104112,230163,78801,50784,17448,14081,18642,216019,15275,28169,212032,12709,12351,67512,12183,66445,67895,71934
hdca_c_12	Hexadecanoate synthesis	41	125	0.328	0.669447	0	50799,22273,56421,15929,76459,110446,100705,78894,67041,14194,20537,12715,11636,67863,11676,27402,13807,78830,67680,78920,224530,11409,230163,78801,246787,17448,241612,14081,18642,109342,216019,15275,212032,12709,12351,78070,12183,57279,66445,67895,71934
hdca_c_159	Hexadecanoate synthesis	41	125	0.328	0.669447	0	50799,22273,56421,15929,76459,110446,100705,78894,67041,14194,20537,12715,11636,67863,11676,27402,13807,78830,67680,78920,224530,11409,230163,78801,246787,17448,241612,14081,18642,109342,216019,15275,212032,12709,12351,78070,12183,57279,66445,67895,71934
hdca_c_16	Hexadecanoate synthesis	41	125	0.328	0.669447	0	50799,22273,218756,56421,15929,76459,110446,100705,78894,67041,14194,12715,11636,67863,11676,27402,13807,78830,67680,78920,224530,11409,230163,78801,246787,17448,241612,14081,18642,109342,216019,15275,212032,12709,12351,78070,12183,57279,66445,67895,71934
hdca_c_161	Hexadecanoate synthesis	41	125	0.328	0.669447	0	50799,22273,56421,15929,76459,110446,100705,78894,67041,14194,20537,12715,11636,67863,11676,27402,13807,78830,67680,78920,224530,11409,230163,78801,246787,17448,241612,14081,18642,109342,216019,15275,212032,12709,12351,78070,12183,57279,66445,67895,71934
hdca_c_192	Hexadecanoate synthesis	41	125	0.328	0.669447	0	50799,22273,56421,15929,76459,110446,100705,78894,67041,14194,20537,12715,11636,67863,11676,27402,13807,78830,67680,78920,224530,11409,230163,78801,246787,17448,241612,14081,18642,109342,216019,15275,212032,12709,12351,78070,12183,57279,66445,67895,71934
hdca_c_28	Hexadecanoate synthesis	41	125	0.328	0.669447	0	50799,22273,218756,56421,15929,17252,110446,100705,54403,78894,67041,14194,20537,12715,11636,67863,11676,27402,13807,78830,67680,78920,224530,11409,230163,78801,246787,17448,241612,14081,18642,109342,216019,15275,212032,12709,78070,12183,57279,66445,67895
hdca_c_95	Hexadecanoate synthesis	41	125	0.328	0.669447	0	50799,22273,56421,15929,76459,110446,100705,78894,67041,14194,20537,12715,11636,67863,11676,27402,13807,78830,67680,78920,224530,11409,230163,78801,246787,17448,241612,14081,18642,109342,216019,15275,212032,12709,12351,78070,12183,57279,66445,67895,71934
hdca_c_98	Hexadecanoate synthesis	41	125	0.328	0.669447	0	50799,22273,218756,56421,15929,17252,110446,100705,78894,67041,20544,14194,20537,12715,11636,67863,11676,27402,13807,78830,67680,78920,224530,11409,230163,78801,246787,17448,241612,14081,18642,109342,216019,15275,212032,12709,78070,12183,57279,66445,67895
pa_hs_c_234	Phosphatidic acid synthesis	41	125	0.328	0.669447	0	50799,22273,68262,17768,56421,76459,100705,54403,14194,20537,12715,114479,11636,67863,11676,27402,13807,14571,78830,67680,78920,14732,11428,104112,230163,78801,20515,17448,14081,18642,216019,15275,28169,212032,12709,12351,67512,12183,66445,67895,71934
pa_hs_c_73	Phosphatidic acid synthesis	41	125	0.328	0.669447	0	50799,22273,68262,17768,56421,76459,100705,54403,14194,20537,12715,114479,11636,67863,11676,27402,13807,14571,78830,67680,78920,14732,11428,104112,230163,78801,20515,17448,14081,18642,216019,15275,28169,212032,12709,12351,67512,12183,66445,67895,71934
pa_hs_c_75	Phosphatidic acid synthesis	41	125	0.328	0.669447	0	50799,22273,68262,218756,17768,56421,17252,76459,100705,14194,20537,12715,11636,67863,11676,27402,13807,14571,78830,67680,78920,14732,104112,230163,78801,20515,17448,14081,18642,216019,15275,28169,212032,12709,12351,67512,12183,66445,67895,269951,71934
dag_hs_c_110	Diacylglycerol synthesis	42	128	0.328125	0.669623	0	50799,22273,68262,17768,56421,15929,76459,100705,54403,14194,12715,11636,67863,11676,27402,13807,14571,78830,67680,78920,14732,104112,230163,78801,246787,50784,17448,241612,14081,18642,109342,216019,15275,28169,212032,12709,12351,67512,12183,66445,67895,71934
hdca_c_101	Hexadecanoate synthesis	42	128	0.328125	0.669623	0	50799,22273,56421,15929,76459,110446,100705,54403,78894,67041,14194,20537,12715,11636,67863,11676,27402,13807,78830,67680,78920,224530,11409,230163,78801,246787,17448,241612,14081,18642,109342,216019,15275,212032,12709,12351,78070,12183,57279,66445,67895,71934
hdca_c_188	Hexadecanoate synthesis	42	128	0.328125	0.669623	0	50799,22273,218756,56421,15929,76459,110446,100705,54403,78894,67041,14194,12715,11636,67863,11676,27402,13807,78830,67680,78920,224530,11409,230163,78801,246787,17448,241612,14081,18642,109342,216019,15275,212032,12709,12351,78070,12183,57279,66445,67895,71934
hdca_c_257	Hexadecanoate synthesis	42	128	0.328125	0.669623	0	50799,22273,56421,15929,76459,110446,100705,78894,67041,20544,14194,20537,12715,11636,67863,11676,27402,13807,78830,67680,78920,224530,11409,230163,78801,246787,17448,241612,14081,18642,109342,216019,15275,212032,12709,12351,78070,12183,57279,66445,67895,71934
hdca_c_82	Hexadecanoate synthesis	42	128	0.328125	0.669623	0	50799,22273,56421,15929,17252,76459,110446,100705,78894,67041,14194,20537,12715,11636,67863,11676,27402,13807,78830,67680,78920,224530,11409,230163,78801,246787,17448,241612,14081,18642,109342,216019,15275,212032,12709,12351,78070,12183,57279,66445,67895,71934
pa_hs_c_123	Phosphatidic acid synthesis	42	128	0.328125	0.669623	0	50799,22273,68262,218756,17768,56421,17252,76459,100705,54403,14194,20537,12715,11636,67863,11676,27402,13807,14571,78830,67680,78920,14732,11428,104112,230163,78801,20515,17448,14081,18642,216019,15275,28169,212032,12709,12351,67512,12183,66445,67895,71934
[truncated: 741 more rows]

## Sheet: NS vs Nh
TaskID	Description	#deregulated	#total genes	percentage	pvalue	FDR	entrezids
h2o2_m_101	Hydrogen peroxide synthesis	21	56	0.375	0.0310225	0	56421,13806,54403,20537,18655,14751,21991,13807,230163,110208,18642,216019,15275,15277,212032,21881,14121,12183,21351,71934,232156
[truncated: 1,897 more rows]

## Sheet: Sh vs Nh
TaskID	Description	#deregulated	#total genes	percentage	pvalue	FDR	entrezids
[truncated: 1,898 more rows]

[truncated: 4 more sheets: NSm vs Sm, NS vs Nm, Sm vs Nm, B6]
