# Supplementary material for: Investigating the deregulation of metabolic tasks via Minimum Network Enrichment Analysis (MiNEA) as applied to nonalcoholic fatty liver disease using mouse and human omics data
Source: PLoS Comput Biol. 2019 Apr 19;15(4):e1006760. doi: 10.1371/journal.pcbi.1006760 (PMC6493771; doi:10.1371/journal.pcbi.1006760)
Supplement: S5 Table — (XLSX) [file pcbi.1006760.s005.xlsx]

## Sheet: Symbol
h	Human
m	Mouse
N	Normal
S	Steatosis
NS	Nonalcoholic steatohepatitis
MTs	Metabolic task
AMiNF	Alternative minimal frequency that measures how many synthesis networks are siginificantly deregulated for a given MT (computed by #dereg MiNs/ #total MiNs)
#dereg MiNs	Number of deregulated minimal-size synthesis networks(MiNs)
#total MiNs	Total number of minimal-size synthesis networks
comb. pvals	All p-value for deregualted MiNs
comb. MiNs	All task ids of deregualted MiNs

## Sheet: NSh vs Sh
MTs	AMiNF	#dereg MiNs	#total MiNs	comb. pvals	comb. MiNs
Cholesterol synthesis	0.7	42	60	0.020449 0.020449 0.020449 0.020449 0.020449 0.026984 0.026984 0.026984 0.026984 0.026984 0.026984 0.026984 0.026984 0.028511 0.028511 0.03006 0.031712 0.031712 0.035095 0.035095 0.035095 0.036811 0.03707 0.03891 0.03891 0.03891 0.03914 0.03914 0.040765 0.040765 0.043104 0.045105 0.045105 0.045105 0.045105 0.047709 0.047709 0.047709 0.049138 0.049138 0.049864 0.049864	chsterol_c_11|chsterol_c_22|chsterol_c_27|chsterol_c_36|chsterol_c_58|chsterol_c_2|chsterol_c_25|chsterol_c_26|chsterol_c_33|chsterol_c_34|chsterol_c_55|chsterol_c_59|chsterol_c_60|chsterol_c_51|chsterol_c_56|chsterol_c_1|chsterol_c_38|chsterol_c_46|chsterol_c_44|chsterol_c_52|chsterol_c_7|chsterol_c_24|chsterol_c_39|chsterol_c_12|chsterol_c_15|chsterol_c_8|chsterol_c_17|chsterol_c_28|chsterol_c_…

## Sheet: NSh vs Nh
MTs	AMiNF	#dereg MiNs	#total MiNs	comb. pvals	comb. MiNs
Hydrogen peroxide synthesis	0.142857	18	126	0.031022 0.031022 0.031022 0.039869 0.039869 0.039869 0.039869 0.039869 0.039869 0.039869 0.039869 0.039869 0.039869 0.048244 0.048244 0.048244 0.048244 0.048244	h2o2_m_101|h2o2_m_44|h2o2_m_89|h2o2_m_111|h2o2_m_113|h2o2_m_122|h2o2_m_123|h2o2_m_124|h2o2_m_18|h2o2_m_3|h2o2_m_77|h2o2_m_95|h2o2_m_99|h2o2_m_100|h2o2_m_42|h2o2_m_61|h2o2_m_80|h2o2_m_90
Triacylglycerol synthesis	0.015564	4	257	0.037318 0.048203 0.048203 0.048207	tag_hs_c_252|tag_hs_c_18|tag_hs_c_222|tag_hs_c_72
Phosphatidic acid synthesis	0.004082	1	245	0.045082	pa_hs_c_42

## Sheet: Sh vs Nh
MTs	AMiNF	#dereg MiNs	#total MiNs	comb. pvals	comb. MiNs

## Sheet: NSm vs Sm
MTs	AMiNF	#dereg MiNs	#total MiNs	comb. MiNs	comb. pvalues
Alanine synthesis	1	39	39	0.0001373 0.0001373 0.0001373 0.00020174 0.00020789 0.0003029 0.0003029 0.0003029 0.0003029 0.00036892 0.00051021 0.00052233 0.00052233 0.00052233 0.0006512 0.00075254 0.00075254 0.00075254 0.00075254 0.00076462 0.00076462 0.00076462 0.00076462 0.00090829 0.00093353 0.00093353 0.0010919 0.0013074 0.0018479 0.0018479 0.001848 0.001848 0.0021934 0.0025872 0.0025872 0.0048355 0.0048981 0.0056912 0.0…	ala-L_c_21|ala-L_c_24|ala-L_c_34|ala-L_c_3|ala-L_c_14|ala-L_c_25|ala-L_c_28|ala-L_c_33|ala-L_c_4|ala-L_c_29|ala-L_c_10|ala-L_c_23|ala-L_c_37|ala-L_c_6|ala-L_c_30|ala-L_c_1|ala-L_c_13|ala-L_c_26|ala-L_c_36|ala-L_c_16|ala-L_c_18|ala-L_c_20|ala-L_c_32|ala-L_c_17|ala-L_c_2|ala-L_c_5|ala-L_c_39|ala-L_c_8|ala-L_c_27|ala-L_c_38|ala-L_c_19|ala-L_c_22|ala-L_c_31|ala-L_c_11|ala-L_c_9|ala-L_c_15|ala-L_c_35|…
Glutamine synthesis	1	34	34	0.00014197 0.00017435 0.00018584 0.00020789 0.00021328 0.00025426 0.00025991 0.00030976 0.00030976 0.00031554 0.00032027 0.00037592 0.00037592 0.00037592 0.00037592 0.0004545 0.00054747 0.00054747 0.00065706 0.00065706 0.00078825 0.00078825 0.00078825 0.00093643 0.0011098 0.0011098 0.0011121 0.0011121 0.0013104 0.0013104 0.0013163 0.001826 0.001826 0.0025006	glu-L_c_14|glu-L_c_22|glu-L_c_12|glu-L_c_11|glu-L_c_6|glu-L_c_24|glu-L_c_15|glu-L_c_25|glu-L_c_3|glu-L_c_27|glu-L_c_9|glu-L_c_13|glu-L_c_17|glu-L_c_30|glu-L_c_8|glu-L_c_34|glu-L_c_23|glu-L_c_31|glu-L_c_20|glu-L_c_4|glu-L_c_16|glu-L_c_21|glu-L_c_7|glu-L_c_29|glu-L_c_26|glu-L_c_32|glu-L_c_10|glu-L_c_5|glu-L_c_1|glu-L_c_18|glu-L_c_33|glu-L_c_19|glu-L_c_2|glu-L_c_28
Phosphatidylserine synthesis	0.833333	5	6	0.0097963 0.015306 0.017716 0.022868 0.028735	ps_hs_c_1|ps_hs_c_6|ps_hs_c_4|ps_hs_c_3|ps_hs_c_5
Ceramide synthesis	1	8	8	0.011753 0.015446 0.020157 0.025276 0.028196 0.032441 0.034828 0.039606	crm_hs_c_2|crm_hs_c_3|crm_hs_c_7|crm_hs_c_4|crm_hs_c_6|crm_hs_c_5|crm_hs_c_1|crm_hs_c_8
Phosphatidylethanolamine synthesis	0.714286	5	7	0.016001 0.024444 0.03753 0.042019 0.045114	pe_hs_c_7|pe_hs_c_2|pe_hs_c_3|pe_hs_c_1|pe_hs_c_5

## Sheet: NSm vs Nm
MTs	AMiNF	#dereg MiNs	#total MiNs	comb. MiNs	comb. pvalues

## Sheet: Sm vs Nm
MTs	AMiNF	#dereg MiNs	#total MiNs	comb. MiNs	comb. pvalues

## Sheet: B6
MTs	AMiNF	#dereg MiNs	#total MiNs	comb. MiNs	comb. pvalues

## Sheet: MainTable
			Nm	NSm	Sm	Metabolic Tasks
		Nh
					1	Alanine synthesis
					1	Glutamine synthesis
					0.833333	Phosphatidylserine synthesis
		NSh			1	Ceramide synthesis
					0.714286	Phosphatidylethanolamine synthesis
			0.142857			Hydrogen peroxide synthesis									Alanine synthesis	1
			0.015564			Triacylglycerol synthesis									Glutamine synthesis	1
			0.004082			Phosphatidic acid synthesis									Phosphatidylserine synthesis	0.833333
															Ceramide synthesis	1
		Sh		0.7		Cholesterol synthesis									Phosphatidylethanolamine synthesis	0.714286
															Cholesterol synthesis	0.7
															Hydrogen peroxide synthesis	0.142857
															Triacylglycerol synthesis	0.015564
															Phosphatidic acid synthesis	0.004082
